# Exploring different virulent proteins of human respiratory syncytial virus for designing a novel epitope-based polyvalent vaccine: Immunoinformatics and molecular dynamics approaches

Abu Tayab Moin<sup>1,¶</sup>, Md. Asad Ullah<sup>2,¶</sup>, Rajesh B. Patil<sup>3</sup>, Nairita Ahsan Faruqui<sup>4</sup>, Bishajit Sarkar<sup>2</sup>, Yusha Araf<sup>5</sup>, Sowmen Das<sup>6</sup>, Khaza Md. Kapil Uddin<sup>1</sup>, Md Shakhawat Hossain<sup>1</sup>, Md. Faruque Miah<sup>5</sup>, Mohammad Ali Moni<sup>7, 8</sup>, Dil Umme Salma Chowdhury<sup>1\*</sup>, Saiful Islam<sup>9\*</sup>

<sup>1</sup>Department of Genetic Engineering and Biotechnology, Faculty of Biological Sciences, University of Chittagong, Chattogram, Bangladesh

<sup>2</sup>Department of Biotechnology and Genetic Engineering, Faculty of Biological Sciences, Jahangirnagar University, Savar, Dhaka, Bangladesh

<sup>3</sup>Sinhgad Technical Education Society's, Sinhgad College of Pharmacy, Department of Pharmaceutical Chemistry, Maharashtra, India

<sup>4</sup>Biotechnology Program, Department of Mathematics and Natural Sciences, School of Data and Sciences, BRAC University, Dhaka, Bangladesh

<sup>5</sup>Department of Genetic Engineering and Biotechnology, School of Life Sciences, Shahjalal University of Science and Technology, Sylhet, Bangladesh

<sup>6</sup>Department of Computer Science and Engineering, School of Physical Sciences, Shahjalal University of Science and Technology, Sylhet, Bangladesh

<sup>7</sup>Bone Biology Division, The Garvan Institute of Medical Research, Darlinghurst, NSW Sydney, Australia

<sup>8</sup>WHO Collaborating Centre on eHealth, UNSW Digital Health, School of Public Health and Community Medicine, Faculty of Medicine, UNSW Sydney, Australia

<sup>9</sup>Bangladesh Council of Scientific and Industrial Research (BCSIR), Chattogram Laboratories, Chattogram, Bangladesh

<sup>¶</sup>These authors contributed equally to this work

31

32 \*Corresponding author:

33 Dil Umme Salma Chowdhury (dilgeb@cu.ac.bd), &

34 Saiful Islam (saifbiology80@gmail.com)

35

36

37

38

39

40

41

42

43

44

45

46

47

48

49 **Abstract**

50 Human Respiratory Syncytial Virus (RSV) is one of the most prominent causes of lower  
51 respiratory tract infections (LRTI), contributory to infecting people from all age groups - a  
52 majority of which comprises infants and children. The implicated severe RSV infections lead  
53 to numerous deaths of multitudes of the overall population, predominantly the children, every  
54 year. Consequently, despite several distinctive efforts to develop a vaccine against the RSV as  
55 a potential countermeasure, there is no approved or licensed vaccine available yet, to control  
56 the RSV infection effectively. Therefore, through the utilization of immunoinformatics tools,  
57 a computational approach was taken in this study, to design and construct a multi-epitope  
58 polyvalent vaccine against the RSV-A and RSV-B strains of the virus. Potential predictions of  
59 the T-cell and B-cell epitopes were followed by extensive tests of antigenicity, allergenicity,  
60 toxicity, conservancy, homology to human proteome, transmembrane topology, and cytokine-  
61 inducing ability. The most promising epitopes (i.e. 13 CTL epitopes, 9 HTL epitopes, and 10  
62 LBL epitopes) exhibiting full conservancy were then selected for designing the peptide fusion  
63 with appropriate linkers, having hBD-3 as the adjuvant. The peptide vaccine was modeled,  
64 refined, and validated to further improve the structural attributes. Following this, molecular  
65 docking analysis with specific TLRs was carried out which revealed excellent interactions and  
66 global binding energies. Additionally, molecular dynamics (MD) simulation was conducted  
67 which ensured the stability of the interactions between vaccine and TLR. Furthermore,  
68 mechanistic approaches to imitate and predict the potential immune response generated by the  
69 administration of vaccines were determined through immune simulations. Owing to an overall  
70 evaluation, *in silico* cloning was carried out in efforts to generate recombinant pETite plasmid  
71 vectors for subsequent mass production of the vaccine peptide, incorporated within *E.coli*.  
72 However, more *in vitro* and *in vivo* experiments can further validate its efficacy against RSV  
73 infections.

74

75 **Keywords:** Human syncytial respiratory virus; Polyvalent multi-epitope vaccine;  
76 Immunoinformatics; Molecular docking; Molecular dynamics simulation; Immune simulation

77

78

79

80

81

82

83

84

85

86

87

88

89

90

91

92

## 93 **1. Introduction**

94 The Human Respiratory Syncytial Virus (hRSV), a member of the family of *Paramyxoviridae*,  
95 is known to be the primary cause of lower respiratory tract infections (LRTI), including

96 pneumonia and bronchiolitis, in infants, children, as well as elderly and immunocompromised  
97 individuals [1-2]. RSV is an enveloped virus that contains a single-stranded, negative-sense  
98 RNA with a genome size of about 15.2 kb. As of yet, two major RSV antigenic subtypes have  
99 been identified, RSV-A and RSV-B, exhibiting differential sequence divergence throughout  
100 their genome; RSV-A has been seen to be more prevalent than RSV-B [2-3]. Antibody cross-  
101 reactivity patterns revealed these two antigenic subgroups (A and B) for RSV, which were then  
102 divided into genotypes based on genetic divergence within the highly variable G gene [4-6].  
103 Contributory to the fact that the RSV attachment (G) protein has a central conserved domain  
104 (CCD) with a CX3C motif, which has been known to be linked to the generation of protective  
105 antibodies, vaccine candidates including the G protein are of considerable interest [7]. A novel  
106 genotype of RSV-A, known as RSV-A ON1 was found in Ontario, Canada, in 2010. RSV-A  
107 ON1 has a 72-nucleotide duplication at the G Protein's C terminus [8], which has been linked  
108 to an increased risk of pneumonia and lower respiratory tract infections [9]. However, the two  
109 subgroups can coexist and thrive, owing to RSV reinfections being common throughout the  
110 life of an infected individual, indicating that cross-immunity against distinct strains is only  
111 partial [10]. RSV-A infection is commonly followed by RSV-B infection, although the scenario  
112 may vary upon several factors [11]. A claim owing to the antigenic diversity of the G protein  
113 states that, both within and between antigenic subgroups, this prominent diversity aids in  
114 evading pre-existing host immune responses [12, 13].

115

116

117 RSV severely affects immunocompromised infants and the geriatric population with weaned  
118 immune systems. The implicated virus infection is considered globally to be the second largest  
119 cause of death, in children under one year of age. RSV-associated acute LRTI is responsible  
120 for around 33 million serious respiratory infections a year, according to the World Health  
121 Organisation (WHO); resulting in more than 3 million hospitalizations and about 60,000 deaths  
122 of children under 5 years of age, and 6.7% of all deaths in infants younger than one-year-old.  
123 About a half of these hospitalizations and deaths have since been confirmed to be in infants  
124 younger than 6 months of age [14]. Additionally, RSV was identified as the third leading cause  
125 of fatal childhood pneumonia after *Streptococcus pneumoniae* and *Haemophilus influenzae* in  
126 2005, responsible for approximately 66,000 to 199,000 deaths from pneumonia in children  
127 younger than 5 years [1]. The consequential impact of RSV on older people may be similar to  
128 that of influenza, according to epidemiological research, both in the community and in long-  
129 term care institutions. In nursing facilities, attack rates are around 5–10 percent per year, with  
130 pneumonia (10–20 percent) and mortality (2–5 percent) being quite common. Moreover, RSV  
131 infections cause around 10,000 deaths yearly among those aged 64 and over, according to  
132 estimates based on US healthcare databases and viral surveillance results [15]. RSV infects the  
133 cells lining the human respiration pathway, including the ciliated epithelial cells, and causes  
134 upper and lower respiratory tract complications. Influenza-like diseases and LRTI display  
135 clinical symptoms of serious RSV infection. However, the most frequent and serious  
136 occurrence of infection in younger children is bronchiolitis. Also, over the lifespan of adults,  
137 reinfection by the same and separate strains of RSV is considered to be normal, and therefore,  
138 RSV is often termed as a chronic virus [2].

139

140 Consequently, over the past two decades, RSV has become a major focus for vaccination  
141 studies to decrease the morbidity of lower respiratory tract infections. Several vaccinations and

142 antiviral drugs have been formulated and implemented over the years since its identification,  
143 and while multiple vaccines, prophylactic and monoclonal antibody candidates are available in  
144 clinical trials, no approved RSV vaccine is currently available to counter RSV [16]. The first  
145 RSV vaccine, composed of the formalin-inactivated virus (FI-RSV) from the Bernett strain,  
146 was studied in a clinical trial back in 1966. Unfortunately, however, the FI-RSV vaccine had a  
147 disastrous effect as it struggled to induce an effective neutralizing antibody response, thus  
148 preventing infection [2]. Large quantities of eosinophils were discovered in the lungs of  
149 children and infants with severe illness, but not in individuals who had a normal RSV infection.  
150 Following this unanticipated outcome, it was crucial to design a safe RSV vaccine, which  
151 included increased testing for vaccine-induced illnesses [17-21]. The inability of the vaccine  
152 to elicit effective neutralizing antibodies or memory CD8+ T cells, as well as the production  
153 of a significant inflammatory CD4 T cell response, contributed to this vaccine-induced illness  
154 [22-25].

155 Numerous modified RSV vaccine candidates have been designed after the failure of the FI-  
156 RSV vaccine trial and many of them are now in clinical trials. However, none of those vaccine  
157 candidates being licensed have so far made it to the international economy, for mass production  
158 and administration. Although live-attenuated vaccines can stimulate both a humoral and  
159 cellular immune response, clinical trials have revealed some potential drawbacks.  
160 Chimpanzees are used to compare the amount of attenuation of vaccinations that are candidates  
161 for use in humans. Karron et al. found that RSV vaccines that were temperature sensitive and  
162 had a high degree of attenuation in chimps could cause infection in the lower respiratory tract  
163 in children [26]. Furthermore, recombinant vector-based vaccinations allow for the  
164 presentation of one or more antigens encoded on a viral vector such as PIV3 or adenovirus  
165 [27]. Intranasal delivery of a new BLP (bacterial-like particle) conjugated to the RSV fusion  
166 protein stimulates both mucosal IgA responses and increased IFN-production in a different sort

167 of vaccination approach [28]. Although both represent effective approaches, further assays to  
168 evaluate the long-lasting immune responses are paramount [29].

169 In addition, it has been observed that, with the use of RSV vaccine candidates, palliative  
170 treatment with RSV anti-infective drugs is also required [30]. Merely two approved RSV  
171 antivirals are currently available, which include, palivizumab, a humanized preventive  
172 monoclonal antibody, and aerosolized ribavirin for therapy. The symptoms of RSV infections  
173 can be alleviated by these two antivirals, although they cannot serve prophylactic measures  
174 [31]. While studies are underway to identify an effective antiviral therapy or countermeasure  
175 to prevent RSV spread and infection, these studies have not been able to deliver any satisfactory  
176 findings that can be used to tackle RSV infections [32].

177 The production of a viable vaccine candidate against a specific pathogen by traditional means  
178 can often take many years [33]. However, the age of vaccine production, especially the novel  
179 epitope-based "subunit vaccines," has been enriched by today's modern technology and the  
180 availability of genomic information for almost all pathogens. These subunit vaccines consist  
181 only of the antigenic protein segments of the target pathogen and hence, toxic and  
182 immunogenic or allergenic parts of the antigen can be dissipated during the construction of the  
183 specific vaccine [34]. Again, the development of vaccines using these computer-based  
184 approaches takes far less time, and thus greatly reduces the expense of construction and  
185 development [35, 36].

186 The immunoinformatics approach in this study was used to establish successful polyvalent  
187 vaccines against the virulent strains of both forms of RSV, i.e. RSV-A and RSV-B respectively.  
188 Immunoinformatics is a vaccine modeling process that allows predictions using several  
189 computational methods. The novel antigens of a pathogen or virus are identified in  
190 immunoinformatics by dissecting its genomic data and then, through the utilization of various  
191 *in silico* biology and bioinformatics tools for vaccine design and development, by analyzing



192 the target pathogen genome [35, 37]. In our research, a polyvalent epitope-based vaccine  
193 blueprint was produced that could produce a significant immune response to both RSV-A and  
194 RSV-B forms, targeting the phosphoprotein (P protein), nucleoprotein (N protein), fusion  
195 glycoprotein (F protein), and major surface glycoprotein (mG protein) of these viruses. Since  
196 RSV-A is more prevalent than RSV-B, as a model, the vaccine was developed using RSV-A  
197 [2]. For the T-cell and B-cell epitope prediction, the RSV-A P protein, N protein, F protein,  
198 and mG protein were used and then the epitopes with 100 % conservancy in both species along  
199 with some other selection criteria were selected for vaccine construction. The criteria for  
200 selecting the epitopes include i.e., antigenicity (the parameter that measures whether the  
201 epitopes stimulate a high antigenic response), non-allergenicity (to ensure that the epitopes do  
202 not cause any unintended allergic reaction inside the body), non-toxicity, conservancy across  
203 the selected organisms, as well as non-homologation of the human proteome. It is, therefore,  
204 expected that the vaccine will be effective against both the subtypes - RSV-A and RSV-B. The  
205 most common vaccine target for RSV is known to be the F protein [574 amino acids (aa) in  
206 length], which is a highly conserved protein in both RSV forms. The F protein mediates the  
207 fusion and attachment of the virus to its target cells along with the mG protein, thus facilitating  
208 viral entry [2, 38]. The F1 (aa 137–574) and F2 (aa 1–109) subunits form a homotrimer in the  
209 mature F protein, and the F1 subunit is required for membrane fusion. The F protein has two  
210 different conformations i.e., the pre-fusion and post-fusion conformations [39, 40]. The protein  
211 rearranges to a more stable post-fusion form during infection to allow viral entrance into the  
212 host cell. Antibodies having neutralizing activity identify at least two antigenic sites on both  
213 the pre-fusion and post-fusion forms of F (sites II and IV) [41-43]. In this study, the precursor  
214 F0 protein was targeted to retrieve all of the potential antigenic epitopes. The possible  
215 conformational change of the F protein, as well as the cleavage sites of the protein sequence,  
216 were taken into account while generating the potential epitopes [39, 40].

217

218 The viral genome of RSV is surrounded by N protein, and the P protein is a vital component  
219 of the viral RNA-dependent RNA polymerase complex which is necessary for the proper  
220 replication and transcription of RSV [44]. Therefore, in our study, these four proteins were  
221 used as possible targets to design a vaccine to suppress these viral proteins, preventing viral  
222 entry, and thus interfering with the life cycle of the virus.

223

## 224 **2. Methods and Materials**

225 The high throughput immunoinformatics and MD approaches of vaccine designing are  
226 illustrated in a step-by-step processes in **Fig 1**.

227

228 **Fig 1.** The step-by-step procedures of immunoinformatics and molecular dynamics approaches  
229 used in the vaccine designing study.

### 230 **2.1. Protein sequences identification and retrieval**

231 Through existing literature reviews in the National Center for Biotechnology Information  
232 (NCBI) (<https://www.ncbi.nlm.nih.gov/>) database, the RSV-A and RSV-B viruses were  
233 identified and selected along with their target proteins (i.e., P protein, N protein, F protein, and  
234 mG protein). The sequences of target proteins of the selected strains (i.e., RSV strain A2 and  
235 RSV strain B1) were then extracted from the UniProt (<https://www.uniprot.org/>) database in  
236 FASTA format. The NCBI Protein database is a collection of SwissProt, PIR, PRF, and PDB  
237 sequences. It also includes GenBank, RefSeq, and TPA translations from elucidated coding  
238 regions.

## 239 **2.2. Prediction of antigenicity and analysis of physicochemical** 240 **properties of the selected proteins**

241 Using the online antigenicity prediction tool, VaxiJen v2.0 ([http://www.ddg-](http://www.ddg-pharmfac.net/vaxijen/VaxiJen/VaxiJen.html)  
242 [pharmfac.net/vaxijen/VaxiJen/VaxiJen.html](http://www.ddg-pharmfac.net/vaxijen/VaxiJen/VaxiJen.html)), the antigenicity of the target protein sequences  
243 was predicted with the prediction precision parameter threshold kept at 0.4. This tool uses the  
244 method of transformation of auto cross-covariance (ACC) to predict the antigenicity of query  
245 proteins or peptides and provides results with an accuracy of 70% to 89%. For this reason, this  
246 server is the widely used and accepted server to determine the antigenicity of query proteins  
247 [45]. ProtParam tool of the ExPASy server (<https://web.expasy.org/protparam/>) has  
248 subsequently determined numerous physicochemical properties, i.e. the number of amino  
249 acids, molecular weight, number of total atoms, theoretical pI, instability index, extinction  
250 coefficient, half-life, grand average of hydropathicity (GRAVY), etc. of the target proteins  
251 [46].

## 252 **2.3. Prediction of T-cell and B-cell epitopes**

253 The two major types of T-cells, cytotoxic T-cells, and Helper T-cells are both considered  
254 essential for the successful design of the vaccine [47]. For specific antigen recognition of the  
255 major histocompatibility complex class I (MHC-I) or CD8<sup>+</sup> cytotoxic T-lymphocytic (CTL)  
256 epitopes on the surface of the antigen-presenting cells (APCs), the cytotoxic T-cells are  
257 important. Additionally, the helper T-cells are considered to be a crucial component of adaptive  
258 immunity that interacts on the surface of APCs with major histocompatibility complex class II  
259 (MHC-II) or CD4<sup>+</sup> helper T-lymphocytic (HTL) epitopes. They function in activating the B-  
260 cell, macrophages, and even cytotoxic T-cells [48, 49]. On the other hand, B-cells produce  
261 antigen-specific immunoglobulins after their activation [50]. They can identify solvent-

262 exposed antigens via membrane-bound immunoglobulins called B cell receptors (BCRs) [51].  
263 B-cell epitopes are important for defense against viral infections because they are the essential  
264 immune system components that activate an adaptive immune response in response to a  
265 specific viral infection. Therefore, the B-cell epitopes are used as one of the crucial building  
266 blocks of the subunit vaccine. There are two types of B-cell epitopes: linear B-cell epitopes  
267 (LBL) and conformational B-cell epitopes, also known as continuous and discontinuous B-cell  
268 epitopes, respectively [52].

269 The T-cell and B-cell epitope prediction was performed using the Immune Epitope Database  
270 or IEDB (<https://www.iedb.org/>), which contains extensive experimental data on antibodies  
271 and epitopes [53]. For the prediction of MHC Class-I or CTL epitopes for several human  
272 leukocyte antigen (HLA) alleles, i.e., HLA A\*01:01, HLA A\*03:01, HLA A\*11-01, HLA  
273 A\*02:01, HLA A\*02:06, and HLA A\*29:02, the recommended IEDB NetMHCpan 4.0  
274 prediction method was used. The default prediction method selection of the server is 'IEDB  
275 recommended' which utilizes the best available technique for a specific MHC molecule based  
276 on the availability of predictors and observes the predicted performance for a specific allele. It  
277 is updated regularly based on predictor availability. NetMHCpan EL 4.1 is currently used  
278 across all alleles for peptide: MHC Class-I binding prediction. Again, for the prediction of  
279 MHC class-II or HTL epitopes for DRB1\*03:01, DRB1\*04:01, DRB1\*15:01, DRB3\*01:01,  
280 DRB5\*01:01, and DRB4\*01:01 alleles, the recommended IEDB 2.22 prediction method was  
281 used. If any corresponding predictor is available for the MHC molecule, the IEDB  
282 recommended method employs the Consensus method, combining NN-align, SMM-align,  
283 CombLib, and Sturniolo; otherwise, NetMHCIIpan is used. If any three of the four approaches  
284 are available, the Consensus approach evaluates them all, with Sturniolo as the final option.  
285 Henceforth, based on their ranking, the top-scored HTL and CTL epitopes that were found to  
286 be common for all of the selected corresponding HLA alleles were considered for further

287 analyses. All the parameters were retained by opting for default during the T-cell epitope  
288 prediction. Subsequently, B-cell epitopes of the proteins were predicted using the BepiPred  
289 linear epitope prediction method 2.0, maintaining all the default parameters. Using a Random  
290 Forest algorithm trained on epitope and non-epitope amino acids obtained from crystal  
291 structures, the BepiPred-2.0 server predicted linear B-cell epitopes from a protein sequence.  
292 Following this, a sequential prediction smoothing was conducted. Residues with scores greater  
293 than the threshold (default value of 0.5) were thought to constitute epitopes [54]. Finally, the  
294 top-scored LBL epitopes containing more than ten amino acids were primarily regarded as  
295 potential candidates for further analysis.

296 Conformational or discontinuous B-cell epitopes are critical components to induce antibody-  
297 mediated humoral immunity within the body. While designing a vaccine, efficient  
298 conformational B-cell epitopes should be included alongside the LBLs to elicit a better  
299 immunogenic response against the pathogen. The conformational B-cell epitopes of the  
300 modeled 3D structure of the vaccine were predicted using IEDB ElliPro, an online server  
301 (<http://tools.iedb.org/ellipro/>) using the default parameters of a minimum score of 0.5 and a  
302 maximum distance of 6 angstroms [55]. ElliPro uses three algorithms to predict the protein  
303 shape as an ellipsoid, measure the residue PI, and estimate adjacent cluster residues based on  
304 their protrusion index (PI) values [56]. ElliPro calculates a score for each output epitope based  
305 on an average PI value over the residues of each epitope. Protein residues are contained in 90%  
306 of ellipsoids with a PI value of 0.9, while 10% of residues are outside ellipsoids. The center of  
307 residue mass residing outside the largest ellipsoid possible was used to calculate the PI value  
308 for each epitope residue [57].

## 309 **2.4. Assessment of antigenicity, allergenicity, toxicity, and topology**

### 310 **prediction of the epitopes**

311 In this step, several methods for predicting their conservancy, antigenicity, allergenicity, and  
312 toxicity were used to evaluate the initially predicted T-cell and B-cell epitopes. To assess the  
313 conservancy of the chosen epitopes [58], the conservancy prediction method of the IEDB  
314 server (<https://www.iedb.org/conservancy/>) was used. Additionally, the components of the  
315 vaccine should be highly antigenic, non-allergenic at the same time, and also devoid of toxic  
316 reactions. In this step, the antigenicity determination tool VaxiJen v2.0 ([http://www.ddg-](http://www.ddg-pharmfac.net/vaxijen/VaxiJen/VaxiJen.html)  
317 [pharmfac.net/vaxijen/VaxiJen/VaxiJen.html](http://www.ddg-pharmfac.net/vaxijen/VaxiJen/VaxiJen.html)) was used again for the determination of  
318 antigenicity [45]. Two different tools were then used, i.e. AllerTOP v2.0 ([https://www.ddg-](https://www.ddg-pharmfac.net/AllerTOP/)  
319 [pharmfac.net/AllerTOP/](https://www.ddg-pharmfac.net/AllerTOP/)) and AllergenFP v1.0 (<http://ddg-pharmfac.net/AllergenFP/>) to obtain  
320 the highest precision for prediction of allergenicity. Both of the tools are based on auto cross-  
321 covariance (ACC) transformation of protein sequences into uniform equal-length vectors.  
322 However, the AllerTOP v2.0 server has a better 88.7 % prediction accuracy than the  
323 AllergenFP v1.0 server (87.9 %) [59, 60]. In addition, the ToxinPred  
324 (<http://crdd.osdd.net/raghava/toxinpred/>) server was used to predict toxicity for all epitopes by  
325 using the Support Vector Machine (SVM) prediction method to keep all the default parameters.  
326 The SVM is a widely accepted machine learning technique for toxicity prediction since it can  
327 differentiate the toxic and non-toxic epitopes quite efficiently [61]. Finally, using the TMHMM  
328 v2.0 server (<http://www.cbs.dtu.dk/services/TMHMM/>), the transmembrane topology  
329 prediction of all the epitopes was performed to predict whether the epitopes were exposed  
330 inside or outside, keeping the parameters at their default values. TMHMM uses an algorithm  
331 called N-best (or 1-best in this case) to predict the most probable location and orientation of  
332 transmembrane helices in the sequence [62].

## 333 **2.5. Cytokine inducing capacity prediction of the epitopes**

334 Several cytokine types, including IFN- $\gamma$ , IL-4 (interleukin-4), and IL-10 (interleukin-10) are  
335 produced by helper T cells to activate various immune cells, i.e. cytotoxic T cells,  
336 macrophages, etc. [63]. As a result, it is crucial to know whether HTL epitopes are capable of  
337 producing key cytokines to induce an immune response against the virus before designing a  
338 vaccine. The induction capacity of the predicted HTL epitopes for interferon- $\gamma$  (IFN- $\gamma$ ) was  
339 determined using the IFNepitope (<http://crdd.osdd.net/raghava/ifnepitope/>) server. Based on  
340 analyzing a dataset that includes IFN- $\gamma$  inducing and non-inducing peptides, the server  
341 determines the probable IFN- $\gamma$  inducing epitopes. To determine the IFN- $\gamma$  inducing capacity,  
342 the Design module and the Hybrid (Motif + SVM) prediction approach were used. The Hybrid  
343 prediction approach is considered to be a highly precise approach to the prediction of the  
344 epitope-inducing capacity of IFN- $\gamma$  [64]. In addition, IL-4 and IL-10 inducing HTL epitope  
345 properties were determined using the servers IL4pred  
346 (<https://webs.iiitd.edu.in/raghava/il4pred/index.php>) and IL10pred  
347 (<http://crdd.osdd.net/raghava/IL-10pred/>) [65, 66]. The SVM method was used on both servers,  
348 where the default threshold values were kept at 0.2 and -0.3, respectively.

## 349 **2.6. Conservancy and human proteome homology prediction**

350 The conservancy analysis of the specified epitopes was conducted using the IEDB server's  
351 epitope conservancy analysis module (<https://www.iedb.org/conservancy/>) [58]. The epitopes  
352 that were found to be fully conserved among the selected strains were taken for the construction  
353 of the vaccine since this will ensure and facilitate the broad-spectrum activity of the polyvalent  
354 vaccine over the two selected RSV species or types. The homology of the human proteome  
355 epitopes was determined by the BLAST (BlastP) protein module of the BLAST tool  
356 (<https://blast.ncbi.nlm.nih.gov/Blast.cgi>), where Homo sapiens (taxid:9606) was used for  
357 comparison, keeping all other default parameters. An e-value cut-off of 0.05 was set and

358 epitopes were selected as non-homologous pathogen peptides that showed no hits below the e-  
359 value inclusion threshold [67]. The epitopes found to be highly antigenic, non-allergenic, non-  
360 toxic, fully conserved, and non-homologous to the human proteome were considered among  
361 all the initially selected epitopes to be the best-selected epitopes or the most promising epitopes,  
362 and only these selected epitopes were used in the construction of the vaccine.

## 363 **2.7. Population coverage and cluster analyses of the epitopes and** 364 **their MHC alleles**

365 A crucial requirement is to consider the distribution of unique HLA alleles among the different  
366 populations and ethnicities around the world to design a multi-epitope vaccine since the  
367 expression of different HLA alleles can vary from population to population. The IEDB resource  
368 for population coverage (<http://tools.iedb.org/population/>) was used for analyzing the  
369 population coverage of the most promising epitopes across several HLA alleles in various  
370 regions around the world. Denominated MHC restriction of T cell responses and polymorphic  
371 HLA combinations were considered in the analysis. All the parameters were maintained at their  
372 default conditions during the study.

373 Furthermore, the human MHC genomic region or HLA is enormously polymorphic, with  
374 thousands of alleles; many of which code for a different molecule. MHCcluster is a program  
375 that organizes the MHC molecules into functional clusters based on their predicted binding  
376 specificity. The approach provides a user-friendly online interface that allows the user to  
377 include any MHC in the analysis. A static heat map and graphical tree-based visualizations of  
378 the functional relationship between the MHC variants are included in the output as well as a  
379 dynamic TreeViewer interface that displays both the functional relationship and the individual  
380 binding specificities of the MHC molecules [68]. To evaluate the relationship between the  
381 selected MHC alleles, cluster analysis of the MHC alleles was done using the online tool



382 MHCcluster 2.0 (<https://services.healthtech.dtu.dk/service.php?MHCcluster-2.0>). During the  
383 study, 50,000 peptides to be used were retained, 100 bootstrap measurements were retained,  
384 and both HLA super-type (MHC Class-I) and HLA-DR (MHC class-II) members were chosen.

## 385 **2.8. Designing of the multi-epitope subunit vaccine**

386 The most promising antigenic epitopes have been linked with each other to create a fusion  
387 peptide using an adjuvant and linkers. Human beta-defensin-3 (hBD-3) used an adjuvant  
388 sequence that was linked to the epitopes by EAAAK linkers. Adjuvants are considered to play  
389 important roles in improving the antigenicity, immunogenicity, stability, and durability of the  
390 developed vaccine. The hBD-3 plays a vital role in host immune responses against the  
391 pathogens (i.e., innate mucosal defense within the respiratory tract) and is highly significant  
392 against respiratory infections [69-71].

393 The epitopes were also appended to the pan HLA-DR epitope (PADRE) sequence. By  
394 enhancing the ability of CTL vaccine epitopes, the PADRE sequence activates the immune  
395 responses [34]. In the conjugation of the CTL, HTL, and LBL epitopes, the AAY, GPGPG,  
396 and KK linkers were used, respectively. The EAAAK linkers have a viable partition of  
397 bifunctional fusion protein domains [72], while the GPGPG linkers are ideal for preventing  
398 junctional epitope production and optimizing the processing and presentation of the immune  
399 system [73]. The AAY linker is also commonly used in the design trials of the *in silico* vaccine  
400 since this linker offers successful and efficient epitope conjugation [74]. In addition, bi-lysine  
401 (KK) linkers are active in the autonomous immunological function of vaccine epitopes [75].

## 402 **2.9. Physicochemical property analyses of the vaccine with** 403 **antigenicity and allergenicity test**

404 To build a timely and successful immune response to the pathogenic attack, the constructed  
405 vaccine should be strongly antigenic. The antigenicity of the vaccine model was estimated  
406 using VaxiJen v2.0 (<http://www.ddg-pharmfac.net/vaxijen/VaxiJen/VaxiJen.htm>), keeping the  
407 threshold value fixed at 0.4 [45]. The findings of the Vaxijen v2.0 server were further cross-  
408 checked by the ANTIGENpro module of the SCRATCH protein predictor  
409 (<http://scratch.proteomics.ics.uci.edu/>), holding all the default parameters [76], to achieve  
410 better prediction precision. Three separate online methods have estimated the allergenicity of  
411 the vaccine structures, i.e. AlgPred (<http://crdd.osdd.net/raghava/algpred/>), AllerTop v2.0  
412 (<https://www.ddgpharmfac.net/AllerTOP/>) and AllergenFP v1.0 ([http://dg-](http://dg-pharmfac.net/AllergenFP/)  
413 [pharmfac.net/AllergenFP/](http://dg-pharmfac.net/AllergenFP/)), to ensure optimum prediction precision. The AlgPred  
414 (<http://crdd.osdd.net/raghava/algpred/>) server aims to combine multiple allergenicity  
415 determination methods to reliably determine possible allergenic proteins [77, 78]. To predict  
416 the vaccine's allergenicity, the MEME/MAST motif prediction approach was used. The  
417 physicochemical properties of the built vaccine were then estimated by the same online  
418 instrument, ProtParam (<https://web.expasy.org/protparam/>)[15], which was previously  
419 utilized. The solubility of vaccine constructs was also estimated alongside the physicochemical  
420 property study by the SOLpro module of the SCRATCH protein predictor  
421 (<http://scratch.proteomics.ics.uci.edu/>) and later further explained by the Protein-Sol server  
422 (<https://protein-sol.manchester.ac.uk/>). The solubility of a query protein is predicted by all  
423 these servers with remarkable precision. SolPro produces its predictions based on the SVM  
424 method, while Protein-Sol uses a rapid method of deciding the results based on sequence [76,  
425 79]. All the parameters of the servers were maintained at their default values during the  
426 solubility review.

## 427 **2.10. Secondary and tertiary structure prediction of the vaccine**

### 428 **construct**

429 The vaccine construct was subjected to secondary structure prediction following  
430 physicochemical analysis. For this, several online resources were used to preserve all the  
431 default parameters, i.e. PSIPRED (<http://bioinf.cs.ucl.ac.uk/psipred/>) (using the PSIPRED 4.0  
432 prediction method), GOR IV ([https://npsa-prabi.ibcp.fr/cgi-bin/npsa\\_automat.pl?page=/NPSA/npsa\\_gor4.html](https://npsa-prabi.ibcp.fr/cgi-bin/npsa_automat.pl?page=/NPSA/npsa_gor4.html)), SOPMA ([https://npsa-prabi.ibcp.fr/cgi-bin/npsa\\_automat.pl?page=/NPSA/npsa\\_sopma.html](https://npsa-prabi.ibcp.fr/cgi-bin/npsa_automat.pl?page=/NPSA/npsa_sopma.html)) and SIMPA96  
433 ([https://npsaprabi.ibcp.fr/cgi-bin/npsa\\_automat.pl?page=/NPSA/npsa\\_npsa.html](https://npsaprabi.ibcp.fr/cgi-bin/npsa_automat.pl?page=/NPSA/npsa_npsa.html)) and SIMPA96  
434 (<https://npsa.npsa.npsa.npsa.npsa>). To predict the percentages or quantities of amino acids in  $\alpha$   
435 helix,  $\beta$ -sheet, and coil structure formations, these servers are considered to be reliable, quick,  
436 and effective [80-84]. Moreover, determination of the tertiary or 3D structure of the vaccine  
437 construct was carried out using the RaptorX online server (<http://raptorx.uchicago.edu/>). Using  
438 an easy and powerful template-based method [85], the server predicts the tertiary or 3D  
439 structure of a query protein. Furthermore, RaptorX uses a deep learning method to enable  
440 distance-based protein folding. This server has also been rated first in contact prediction in both  
441 CASP12 and CASP13, making it an ideal server for 3D structure determination [86].

## 444 **2.11. Refinement and validation of tertiary structure of the vaccine**

445 The tertiary structure prediction of the proteins using computational methods also requires  
446 extensive refinement, to turn predicted models with lower resolution into models that closely  
447 match the native protein structure. Therefore, a GalaxyWEB server (<http://galaxy.seoklab.org/>)  
448 using the GalaxyRefine module further refined the created tertiary structure of the proposed  
449 vaccine model. The server uses dynamic simulation and the refinement approach is tested by  
450 CASP10 to refine the tertiary protein structures [87, 88]. Furthermore, validation of the refined  
451 protein was carried out by analyzing the Ramachandran plot created by the PROCHECK  
452 (<https://servicesn.mbi.ucla.edu/PROCHECK/>) tool [89, 90]. Along with PROCHECK for  
453 protein validation, another online platform, ProSA-web

454 (<https://prosa.services.came.sbg.ac.at/prosa.php>) was also used. A z-score that expresses the  
455 consistency of a query protein structure is created by the PROCHECK server. In the latest PDB  
456 database, a z-score residing within the z-score spectrum of all experimentally defined protein  
457 chains represents a higher consistency of the query protein [91].

## 458 **2.12. Vaccine protein disulfide engineering analysis**

459 Disulfide bonds are more likely to form in a few regions within a protein structure, providing  
460 stability through reduced conformational entropy and increased free energy concerning the  
461 denatured state. However, disulfide engineering is the process of introducing disulfide bonds  
462 to a target protein to increase its stability. In this experiment, the Disulfide by Design (DbD)2  
463 v12.2 (<http://cptweb.cpt.wayne.edu/DbD2/>) online tool was used to predict the locations and  
464 further design the disulfide bonds within the vaccine proteins [92]. The tool was developed  
465 using computational approaches to predict the protein structure [93, 94], and the algorithm of  
466 this server accurately estimates the  $\chi_3$  torsion angle based on the C $\beta$ -C $\beta$  distance using a  
467 geometric model derived from native disulfide bonds. The Caf-C $\beta$ -S $\gamma$  angle is allowed some  
468 tolerance in the DbD2 server based on the wide range found in native disulfides. To facilitate  
469 the ranking process, DbD2 estimates an energy value for each potential disulfide and mutant  
470 PDB files may be generated for selected disulfides [95].

471 The  $\chi_3$  angle was held at  $-87^\circ$  or  $+97^\circ \pm 10$  during the experiment to cast off various putative  
472 disulfides that were generated using the default angles of  $+97^\circ \pm 30^\circ$  and  $-87^\circ \pm 30^\circ$ .  
473 Additionally, the angle of Caf-C $\beta$ -S $\gamma$  was set to its default value of  $114.6^\circ \pm 10$ . Finally, to  
474 allow disulfide bridge formation, residue pairs with energy less than 2.2 Kcal/mol were selected  
475 and mutated to cysteine residue [96]. The energy value of 2.2 Kcal/mol was chosen as the  
476 disulfide bond selection threshold since 90% of native disulfide bonds are usually considered  
477 to have an energy value of less than 2.2 Kcal/mol [92].

## 478 **2.13. Post-translational modification analysis**

479 For posttranslational modification analysis of the vaccine construct comprising of the B-cell  
480 and T-cell epitopes, the NetNGlyc-1.0 (<http://www.cbs.dtu.dk/services/NetNGlyc-1.0>),  
481 NetOGlyc4.0 (<http://www.cbs.dtu.dk/services/NetOGlyc-4.0>), and NetPhos-3.1  
482 (<http://www.cbs.dtu.dk/services/NetPhos-3.1>) servers were utilized. The NetNglyc server uses  
483 artificial neural networks to predict N-glycosylation sites in human proteins by examining the  
484 sequence context of Asn-Xaa-Ser/Thr sequons [97]. Any potential that exceeds the default  
485 threshold of 0.5 indicates a predicted glycosylated site. The average output of nine neural  
486 networks is used to get the 'potential' score. The NetOglyc server  
487 (<http://www.cbs.dtu.dk/services/NetOGlyc-4.0>) predicts mucin type GalNAc O-glycosylation  
488 sites in mammalian proteins using neural networks [98].

489 This server provides a list of probable glycosylation sites for each input sequence, together  
490 with their positions in the sequence and prediction confidence scores. Only locations with a  
491 score greater than 0.5 are expected to be glycosylated and the string "POSITIVE" is added to  
492 the remark box. Using ensembles of neural networks, the NetPhos 3.1 server  
493 (<http://www.cbs.dtu.dk/services/NetPhos-3.1>) predicts serine, threonine, or tyrosine  
494 phosphorylation sites in eukaryotic proteins. Predictions are made for both generic and kinase-  
495 specific kinases. A prediction score greater than 0.5 indicates a positive prediction.

## 496 **2.14. Analysis of protein-protein docking**

497 The vaccine protein was docked against several toll-like receptors (TLRs) in protein-protein  
498 docking analysis. A strong binding affinity should be present between the vaccine and the  
499 TLRs. This is crucial because, after identifying the vaccine that resembles the initial viral  
500 infections, TLR proteins generate possible immune responses, and thus help to produce  
501 immunity against the pathogen [99]. In this study, different TLRs have been docked with the

502 vaccine protein, i.e. TLR-1 (PDB ID: 6NIH), TLR-2 (PDB ID: 3A7C), TLR-3 (PDB ID:  
503 2A0Z), TLR-4 (PDB ID: 4G8A), and TLR9 (PDB ID: 3WPF). ClusPro v2.0  
504 (<https://cluspro.bu.edu/login.php>) was used to conduct the docking, where the lower energy  
505 score corresponds to the stronger binding affinity. Based on the following equation, the ClusPro  
506 server calculates the energy score:

$$507 \quad E = 0.40E_{rep} + (-0.40E_{att}) + 600E_{elec} + 1.00E_{DARS} [54 - 55].$$

508 The repulsions and attraction energies owing to van der Waals interactions are denoted by  $E_{rep}$   
509 and  $E_{attr}$ , respectively, whereas  $E_{elec}$  signifies the electrostatic energy component. The Decoys'  
510 pairwise structure-based potential is represented by  $E_{DARS}$  as the Reference State (DARS)  
511 method. Furthermore, another round of docking was carried out using the ZDOCK server  
512 which is a rigid-body protein-protein docking tool that employs a combination of shape  
513 complementarity, electrostatics, and statistical potential terms for scoring and uses the Fast  
514 Fourier Transform algorithm to enable an efficient global docking search on a 3D grid. In the  
515 most current benchmark version (Accelerating protein docking in ZDOCK utilizing an  
516 advanced 3D convolution library), ZDOCK achieves high predictive accuracy on protein-  
517 protein docking benchmarks, with >70 % success in the top 1000 predictions for rigid-body  
518 instances [100].

## 519 **2.15. Molecular dynamics simulation studies and MM-PBSA** 520 **calculations**

521 The docked complexes from the ZDOCK server were used in MD simulations. The complexes  
522 being protein-protein in nature with multiple chains, the MD simulations were computationally  
523 expensive and performed on the HPC cluster at Bioinformatics Resources and Applications  
524 Facility (BRAAF), C-DAC, Pune with Gromacs 2020.4 [101] MD simulation package. The  
525 CHARMM-36 force field parameters [102, 103] were employed to prepare the topology of

526 protein chains. The system of each TLR along with the bound vaccine was solvated with the  
527 single point charge water model [104] in the dodecahedron unit cells and neutralized with the  
528 addition of Na<sup>+</sup> or Cl<sup>-</sup> counter-ions. The solvated systems were initially energy minimized to  
529 relieve the steric clashes if any with the steepest descent criteria until the threshold (Fmax < 10  
530 kJ/mol) was reached. These energy minimized systems were then equilibrated at constant  
531 volume and temperature conditions 300 K using modified Berendsen thermostat [105] and then  
532 at constant volume and pressure Berendsen barostat [106] for 100 ps each. The equilibrated  
533 systems were later subjected to 100 ns production phase MD simulations, where the modified  
534 Berendsen thermostat and Parrinello-Rahman barostat [107] were used with covalent bonds  
535 restrained using the LINCS algorithm [108]. The long-range electrostatic interaction energies  
536 were measured with the cut-off of 12 Å, with the Particle Mesh Ewald method (PME) [109].  
537 The resulting trajectories were analyzed for root mean square deviations (RMSD) in protein  
538 backbone atoms, root mean square fluctuations (RMSF) in the side chain atoms of individual  
539 chains in each protein complex, the radius of gyration (Rg), and several hydrogen bonds formed  
540 between vaccine protein chain and the respective TLR protein chain.

## 541 **2.16. Immune simulation studies**

542 To forecast the immunogenicity and immune response profile of the proposed vaccine, an  
543 immune simulation analysis was performed. For the immune simulation study, the C-ImmSim  
544 server (<http://150.146.2.1/CIMMSIM/index.php>) was used to predict real-life immune  
545 interactions using machine learning techniques and PSSM (Position-Specific Scoring Matrix)  
546 [110]. During the experiment, all the variables except for the time steps were kept at their  
547 default parameters. However, the time steps at 1, 84, and 170 were retained (time step 1 is  
548 injection at time = 0), and the number of simulation steps was set to 1050. Thus, three injections  
549 at four-week intervals were administered to induce recurrent antigen exposure [111].

## 550 **2.17. Codon adaptation and *in silico* cloning within *E.coli* System**

551 Codon adaptation and *in silico* cloning are two significant steps that are conducted to express  
552 multi-epitope vaccine construction within an *Escherichia coli* (*E.coli*) K12 strain. In different  
553 organisms, an amino acid can be encoded by more than one codon, which is known as codon  
554 bias wherefore, the codon adaptation study is carried out to predict an appropriate codon that  
555 effectively encodes a specific amino acid in a specific organism. Java Codon Adaptation Tool  
556 or JCat server (<http://www.jcat.de/>) was used for codon optimization [112], and the optimized  
557 codon sequence was further analyzed for expression parameters, codon adaptation index (CAI),  
558 and GC-content %. The optimum CAI value is 1.0, while a score of > 0.8 is considered  
559 acceptable, and the optimum GC content ranges from 30 to 70% [113]. For *in silico* cloning  
560 simulation, the pETite vector plasmid was selected which contains a small ubiquitin-like  
561 modifier (SUMO) tag as well as a 6x polyhistidine (6X-His) tag, which will facilitate the  
562 solubilization and affinity purification of the recombinant vaccine construct [114]. Also, 6X-  
563 His can facilitate the swift detection of the recombinant vaccine construct in  
564 immunochromatographic assays [115]. The vaccine protein sequence was reverse-translated to  
565 the optimized DNA sequence by the server to which EaeI and StyI restriction sites were  
566 incorporated at the N-terminal and C-terminal sites, respectively. The newly adapted DNA  
567 sequence was then inserted between the EaeI and StyI restriction sites of the pETite vector  
568 using the SnapGene restriction cloning software (<https://www.snapgene.com/free-trial/>) to  
569 confirm the expression of the vaccine [116, 117].

## 570 **2.18. Prediction of the vaccine mRNA secondary structure**

571 Two servers, i.e. Mfold (<http://unafold.rna.albany.edu/?q=mfold>) and RNAfold  
572 (<http://rna.tbi.univie.ac.at/cgi-bin/RNAWebSuite/RNAfold.cgi>), were used for the mRNA  
573 secondary structure prediction. Both of these servers thermodynamically predict the mRNA



574 secondary structures and provide each of the generated structures with minimum free energy  
575 ('G Kcal/mol'). The more stable the folded mRNA is, the lower the minimum free energy and  
576 vice versa [55][118-120]. To analyze the mRNA folding and secondary vaccine structure, the  
577 optimized DNA sequence was first taken from the JCat server and converted via the DNA<-  
578 >RNA->Protein tool (<http://biomodel.uah.es/en/lab/cybertory/analysis/trans.htm>) to a possible  
579 RNA sequence. The RNA sequence was then gathered from the tool and utilized for prediction  
580 into the Mfold and RNAfold servers using the default settings for all the parameters.

581

## 582 **3. Results**

### 583 **3.1. Protein sequences identification and retrieval**

584 From the NCBI database, the RSV viral strains and the query proteins were identified.  
585 Following that, the four RSV-A and RSV-B Query Proteins including P protein, N protein, F  
586 protein, and mG, were retrieved from the UniProt online database. The UniProt Accession  
587 Number and the length of the query proteins are listed in **Table 1**.

588

589 **Table 01.**

| Name of the Virus | Name of the Protein | UniProt Accession Number of the Protein | Length (aa) of the Protein Sequence |
|-------------------|---------------------|-----------------------------------------|-------------------------------------|
| RSV-A             | P protein           | P03421                                  | 241                                 |
|                   | N protein           | P03418                                  | 391                                 |
|                   | F protein           | P03420                                  | 574                                 |
|                   | mG protein          | P03423                                  | 298                                 |
| RSV-B             | P protein           | O42062                                  | 241                                 |
|                   | N protein           | O42053                                  | 391                                 |

|  |            |        |     |
|--|------------|--------|-----|
|  | F protein  | O36634 | 574 |
|  | mG protein | O36633 | 299 |

590 List of the proteins with their accession numbers used in the vaccine designing study.

591

## 592 **3.2. Prediction of antigenicity and analysis of physicochemical** 593 **properties of the selected proteins**

594 The selected proteins were analyzed for antigenicity and physicochemical properties through  
595 the VaxiJen v2.0 server and ProtParam tool of the ExPASy server, respectively. To be a vaccine  
596 candidate, antigenicity is a prerequisite for a protein or amino acid sequence. All of the selected  
597 proteins were found to be antigenic in VaxiJen v2.0 server at threshold 0.4. In addition, while  
598 P protein and N protein of RSV-A and RSV-B were found to have an acidic theoretical pI (pH  
599 lower than 7), F protein and mG protein were found to have a basic theoretical pI (pH higher  
600 than 7). The protein having an acidic theoretical pI belongs to negatively charged proteins.  
601 Again, in the mammalian cell culture system, all the query proteins had a similar half-life of  
602 30 h and a high aliphatic index (over 60.00) as well. All of the proteins had quite low GRAVY  
603 values (lower than -0.909). P protein of the RSV-A and RSV-B had the highest GRAVY value  
604 of -0.909 and -0.827, respectively. Whereas, the F protein of RSV-A and RSV-B had the lowest  
605 GRAVY value of -0.028 and -0.033, respectively. Furthermore, the F protein of the RSV-A  
606 and RSV-B had the highest aliphatic index of 99.97 and 102.35, respectively. **S1 Table** lists  
607 the results of the analysis of physicochemical properties of all the query proteins.

## 608 **3.3. Epitope prediction and sorting the most promising epitopes**

609 The RSV-A proteins were selected as models during the prediction of the T-cell and B-cell  
610 epitopes by the IEDB server for the construction of the polyvalent vaccine, meaning that the

611 epitopes were selected using only the RSV-A proteins and then only the fully conserved  
 612 epitopes were taken therefore, the epitopes should confer immunity to the selected strains of  
 613 both RSV-A and RSV-B. These epitopes were anticipated to induce potential T-cell and B-cell  
 614 immune responses after the vaccine administration. Based on the ranking, the top CTL and  
 615 HTL epitopes as well as top B-cell epitopes with lengths over ten amino acids were taken into  
 616 consideration for further analysis. Following this, a few criteria were selected to filter the best  
 617 epitopes which included, high antigenicity, non-allergenicity, non-toxicity, conservancy, and  
 618 human proteome non-homology. Furthermore, the cytokine (i.e., IFN- $\gamma$ , IL-4, and IL-10)  
 619 inducing ability of HTL epitopes was also considered to determine whether they can produce  
 620 at least one of these cytokines. Finally, the epitopes that met these criteria were listed as the  
 621 most promising epitopes in **Table 02** and were later used for the construction of the vaccine.  
 622 The analysis of transmembrane topology by the TMHMM v2.0 server of the most promising  
 623 epitopes revealed that PEFHGEDANNR, SFKEDPTPSDNPFS, EVAPEYRHDSPP,  
 624 VFPSDEFDASISQVNEK,  
 625 IPNKKPGKKTTHKPTKKPTLKTTHKDPKPQTTHKSKEVPTTKP were exposed outside.  
 626 **S2 Table** listed the potential epitopes of P protein and **S3 Table** listed the potential epitopes of  
 627 N protein. The potential epitopes of F protein are listed in **S4 Table** and the potential epitopes  
 628 of mG protein are listed in **S5 Table**.

629

630 **Table 02.**

| Name of the Protein | MHC class-I epitopes | MHC class-II epitopes | B cell epitopes                    |
|---------------------|----------------------|-----------------------|------------------------------------|
| P protein           | VSLNPTSEK            | LGMLHTLVVASAGPT       | PEFHGEDANNR                        |
|                     | QTNDNITAR            | LHTLVVASAGPTSAR       | EVTKESPITSNSTIINPTNETDDTAGNKPNYQRK |
|                     | -                    | -                     | SFKEDPTPSDNPFS                     |

|            |           |                 |                                                        |
|------------|-----------|-----------------|--------------------------------------------------------|
|            | -         | -               | RNEESEKMAKDTSDDEVSLNPTSEK                              |
| N protein  | CIAALVITK | EVLTLASLTTEIQIN | EVAPEYRHDSPE                                           |
|            | RSGLTAVIR | -               | EYRGTPRNQDLYDA                                         |
|            | SVKNIMLGH | -               | -                                                      |
| F protein  | KTNVTLISK | IVIIILLSLIAVGL  | VFPSDEFDASISQVNEK                                      |
|            | KSALLSTNK | VIIILLSLIAVGLL  | -                                                      |
|            | IASGVAVSK | EEFYQSTCSAVSKGY | -                                                      |
|            | KQLLPIVNK | -               | -                                                      |
|            | ITIELSNIK | -               | -                                                      |
|            | LTSKVLDLK | -               | -                                                      |
| mG protein | TTTQTQPSK | LSILAMIISTSLIIA | TSQIKNTTPTYLTQNPQLGISPSNPSEITS                         |
|            | IFIASANHK | TLSILAMIISTSLII | IPNKKPGKKTTKPTKKPTLKTTKKDPKPQTTKSKEVPTTKP<br>TEEPTINTT |
|            | -         | QNPQLGISPSNPSEI | SNTTGNPELTSQ                                           |

631 List of the epitopes eventually selected for the construction of the vaccine (selection criteria:  
632 antigenicity, non-allergenicity, non-toxicity, 100 % conservancy and non-homolog to the  
633 human proteome).

634

### 635 **3.4. Population coverage and cluster analyses of the epitopes and** 636 **their MHC alleles**

637 The population coverage analysis showed that 85.70% and 87.92% of the world population  
638 were covered by the MHC class-I and class-II alleles and their epitopes, respectively, and  
639 84.62% of the world population was covered by the combined MHC class-I and class-II. While  
640 India had the highest percentage of population coverage for the CTL epitopes (87.56 %) as  
641 well as HTL epitopes (93.51 %), China had the highest percentage of population coverage for  
642 CTL and HTL epitopes in combination (91.80 %) (**Fig 2**).

643

644 **Fig 2.** The result of the population coverage analysis of the most promising epitopes and their  
645 selected MHC alleles

646

647 Cluster analysis of the potential alleles of MHC class I and MHC class II that may interfere  
648 with the predicted epitopes of the RSV query proteins was also conducted. The study was  
649 carried out using the online tool MHCcluster 2.0, which phylogenetically demonstrates the  
650 relation of the allele clusters. **S1 Fig** shows the outcome of the experiment where a strong  
651 interaction is shown in the red zone and a weaker interaction in the yellow zone.

### 652 **3.5. Designing of the multi-epitope subunit vaccine**

653 The most promising T-cell and B-cell epitopes were used to design the multi-epitope vaccine  
654 incorporating adjuvant and appropriate linkers. The hBD-3 was used as an adjuvant to design  
655 the vaccine and the PADRE sequence was also used as a potent inducer of immunity. The  
656 adjuvant was linked with the epitopes by the EAAAK linker. Furthermore, AAY, GPGPG, and  
657 KK were used to associate the epitopes with each other at their appropriate positions as given  
658 in **Fig 3**.

659

660 **Fig 3.** (A) Schematic representation of the potential vaccine construct with linkers (EAAAK,  
661 AAY, GPGPG, and KK), PADRE sequence, adjuvant (hBD-3) and epitopes (CTL, HTL, and LBL)  
662 in a sequential and appropriate manner (B) Sequence of the vaccine protein. The letters in bold  
663 represent the linker sequences.

664

### 665 **3.6. Prediction of antigenicity, allergenicity and Physicochemical** 666 **property analysis of the vaccine**

667 The vaccine protein was observed to be both a potent antigen and a non-allergen. The vaccine  
668 had a high theoretical (basic) pI of 9.75. It had a reasonably adequate half-life in mammalian  
669 cells of 30 h and of more than 10 h in the *E. coli* cell culture system. The GRAVY value of the  
670 vaccine was considered to be significantly negative at -0.362. Additionally, both servers, Sol-  
671 Pro and Protein-sol, have also shown that the vaccine protein is soluble, attesting to its negative  
672 value. The instability index of the protein was found to be less than 40 (27.55), indicating the  
673 vaccine to be quite stable. The extinction coefficient and the aliphatic index of the vaccine were  
674 also found to be high with values, 45770 M<sup>-1</sup> cm<sup>-1</sup> and 80.85, respectively.

### 675 **3.7. Secondary and tertiary structure prediction of the vaccine**

676 The secondary structure of the vaccine protein revealed that the coil structure had the largest  
677 number of amino acids, while the  $\beta$ -strand showed the lowest percentage. The predictions  
678 provided by all four servers are depicted in **Fig 4**. The amino acid percentages of  $\alpha$ -helix,  $\beta$ -  
679 strand, and coil structure of the vaccine protein produced from four different servers are listed  
680 in **Table 03**. All of the servers revealed almost similar predictions and the overall analysis also  
681 showed that the adjuvant generated potential variations in the secondary structure of the  
682 vaccine protein. The vaccine construct's 3D structure was predicted by the RaptorX online  
683 server. The constructed vaccine protein had a surprisingly low p-value of 8.71e-05 in 4  
684 domains, which demonstrated that the accuracy of the proposed 3D structure was significantly  
685 good. Using 1KJ6A as the template from the Protein Data Bank, the homology modeling of  
686 the vaccine construct was completed. Furthermore, the vaccine structure was modeled using  
687 Modeller, as shown in **Fig 5**, to further improve the quality.

688 **Table 03.**

| Secondary structure elements | PRISPRED | GOR IV | SOPMA  | SIMPA96 |
|------------------------------|----------|--------|--------|---------|
| $\alpha$ -helix              | 33.51%   | 32.98% | 30.56% | 29.61%  |

|                 |        |        |        |        |
|-----------------|--------|--------|--------|--------|
| $\beta$ -strand | 16.22% | 15.58% | 18.46% | 14.50% |
| Coil structure  | 50.25% | 51.44% | 50.98% | 55.74% |

689 Results of the secondary structure analysis of the vaccine construct.

690 **Fig 4.** The results of the secondary structure prediction of the vaccine. (A) PRISPRED  
691 prediction, (B) GOR IV prediction, (C) SOPMA prediction, (D) SIMPA96 prediction.

692 **Fig 5.** (A) The tertiary or 3D structure of the vaccine construct modeled, refined and visualized  
693 by RaptorX, GalaxyWEB server, and BIOVIA Discovery Studio Visualizer v. 17.2  
694 respectively. (B) The results of the Ramachandran plot analysis generated by PROCHECK  
695 server and (C) quality score or z-score graph generated by the ProSA-web server of the refined  
696 vaccine construct. In the Ramachandran plots, the orange and deep yellow colored regions are  
697 the allowed regions, the light yellow regions are the generously allowed regions and the white  
698 regions are the outlier regions and the glycine residues are represented as triangles.

699

### 700 **3.8. Refinement and validation of tertiary structure of the vaccine**

701 The 3D structure of the vaccine protein produced by the RaptorX server was refined to predict  
702 a structure that closely resembles the native protein structure. The refined protein structure was  
703 then validated by evaluating the PROCHECK server-generated Ramachandran plot and the  
704 ProSA-web server-generated z-score. The Ramachandran plot study found that in the most  
705 preferred region, the vaccine protein had 93.5 % of amino acids, while in the additional  
706 approved regions, 5.4 % of amino acids, 0.4 % of amino acids in the generously permitted  
707 regions, and 0.7 % of amino acids in the disallowed regions. In comparison, the z-score of the  
708 engineered vaccine was -6.58, which is beyond the range of all experimentally confirmed X-  
709 ray crystal protein structures from the Protein Data Bank. The protein validation analysis  
710 estimated that there was a reasonably good consistency structure in the distilled form (**Fig 5**).

### 711 **3.9. Prediction of conformational B-lymphocytic epitopes**

712 The conformational B-cell epitopes of the vaccine protein were predicted using the ElliPro  
713 server which predicts conformational epitopes from tertiary structures of the protein. A score  
714 of 0.50 or higher was selected for the prediction of discontinuous peptides by Ellipro. Three  
715 discontinuous B-cell epitopes were predicted to include 333 amino acid residues, with values  
716 ranging from 0.506 to 0.675. The size of the conformation epitopes varied from 4 to 394  
717 residues. Three-dimensional representation of conformational B cell epitopes of the designed  
718 multi-epitope-based RSV vaccine and the epitope residues are shown in **Fig 6** and listed in **S6**  
719 **Table**.

720

721 **Fig 6.** Graphical representations of the predicted conformational B-cell epitopes of the modeled  
722 vaccine indicated by yellow coloured ball-shaped structures.

723

### 724 **3.10. Vaccine protein disulfide engineering analysis**

725 The disulfide bonds of the vaccine structure were predicted using the DbD2 server in protein  
726 disulfide engineering. Based on certain classification criteria, the server recognizes pairs of  
727 amino acids with the ability to form disulfide bonds. Only those amino acid pairs that had bond  
728 energy smaller than 2.2 kcal/mol were chosen in this experiment. Three pairs of amino acids  
729 with bond energy below 2.2 kcal/mol were provided by the RSV: 23 Cys and 38 Cys, 414 Ala  
730 and 414 Lys, and 513 Tyr- 516 Thr. The selected pairs of amino acids have formed the mutant  
731 vaccine in the DbD2 server, which contains potential disulfide bonds within (**S2 Fig**). This  
732 indicates the probable stability of the designed multi-epitope vaccine construct.



### 733 **3.11. Post-translational modification analysis**

734 The posttranslational modification analysis was performed to see whether the vaccine construct  
735 would undergo any substantial changes after being administered to mammalian cells. Four N-  
736 glycosylation sites and sixty-three O-glycosylation sites were predicted in the vaccine construct  
737 sequence. The findings suggest that a significant amount of glycosylation may have occurred  
738 inside the predicted vaccine construct, which might improve the vaccine's efficacy and  
739 immunogenicity. In addition, the vaccine protein sequence has ninety-six phosphorylated  
740 residues (i.e., serine residues (S), threonine (T), and tyrosine (Y) phosphorylation sites)  
741 according to the NetPhos v2.0 server output. The server-provided plots containing the N-  
742 glycosylation sites and phosphorylation are given in **S3 Fig**.

### 743 **3.12. Analysis of protein-protein docking**

744 Protein-protein docking analysis was performed to demonstrate the vaccine's ability to interact  
745 with various crucial molecular immune components i.e., TLRs. When docked using ClusPro  
746 2.0, it demonstrated very high binding affinities with all its targets (TLRs). It has been further  
747 studied using the ZDOCK server where the vaccine protein also displayed very strong  
748 interaction with the TLRs. The lowest energy level obtained for docking between the vaccine  
749 construct and TLR-1, TLR-2, TLR-3, TLR-4, and TLR-9 were -986.1, -1236.7, -1084.4, -  
750 1260.8, and -1226.4, respectively. The lowest energy level between the vaccine and TLRs  
751 indicated the highest binding affinity.

### 752 **3.13. Molecular dynamics simulation studies and MM-PBSA** 753 **calculations**

754 MD simulation is an effective method for the analysis of biological systems and it provides  
755 many mechanistic insights into the possible behavior of the system under a simulated biological

756 environment [121]. Gromacs 2020.4 was used to carry out the production phase MD and the  
757 analysis of resulting trajectories was undertaken to understand the structural properties, and  
758 interaction between different TLRs and the predicted vaccine protein at a molecular level. The  
759 snapshots of equilibrated structures of each TLR-vaccine complex and the snapshots of the last  
760 trajectories are shown in **Fig 7**. The visual inspection of trajectories at different time intervals  
761 suggested that the side chains of the vaccine make different interactions with chain A of all  
762 TLRs except TLR1, where vaccine side chains were found to be interacting with side chains  
763 of both A and B chains.

764

765 **Fig 7**. Snapshots of equilibrated (initial) systems and last trajectories. Vaccine bound  
766 complexes of A) TLR1, B) TLR2, C) TLR3, D) TLR4, and E) TLR9 (For each snapshot the  
767 surface representation and cartoon representations are shown)

768

769 Root mean square deviations (RMSD) analysis gives insights into how the backbone atoms  
770 move relative to the initial equilibrated positions. Lower the RMSD, better the stability of the  
771 corresponding system. In the present work, we measured the RMSD in backbone atoms of  
772 entire protein-protein complexes of TLRs with a vaccine. **Fig 8A** shows the RMSD in the  
773 investigated systems. The evaluation of root means square fluctuations (RMSF) provides  
774 insights into the possible changes in the secondary structure of protein under investigation. In  
775 the present work, the RMSF in the side chain atoms of residues in each system was measured.  
776 As the TLR-vaccine systems have multiple chains, the RMSF evaluation is performed on each  
777 chain of the complex to understand which residues are involved in the key contacts. The RMSF  
778 in the TLR side-chain atoms is shown in **Fig 8B**. The RMSF in other chains in each of the  
779 TLRs is given in **S4 Fig**. The analysis of radius of gyration (Rg) provides the overall  
780 measurement of compactness of the system [122]. The results of total Rg are shown in **Fig 8C**.

781 Analysis of non-bonded interactions such as hydrogen bonds is quite challenging in protein-  
782 protein complexes. The side chains of the proteins participate in hydrogen bond interactions.  
783 The hydrogen bond analysis of all the trajectories was performed with the h-bond module of  
784 Gromacs, while the key residues at the interface of the TLR chain and vaccine chain were  
785 analyzed through the chimeraX program [123]. The results of the hydrogen bond analysis are  
786 shown in **S5 Fig**.

787

788 **Fig 8:** Results of the (A) Root mean square deviations in the investigated systems, (B) Root  
789 mean square fluctuations in the side chain atoms of vaccine, and (C) Radius of gyration of the  
790 vaccine.

791

### 792 **3.14. Immune simulation studies**

793 The immune simulation study of the designed vaccine was conducted using the C-ImmSimm  
794 server which forecasts the activation of adaptive immunity as well as the immune interactions  
795 of the epitopes with their specific targets [63]. The analysis exhibited that the primary immune  
796 reaction to the vaccine could be stimulated substantially after administration of the vaccine, as  
797 demonstrated by a steady rise in the levels of different immunoglobulins i.e., (IgG1 + IgG2,  
798 and IgG + IgM antibodies) (**Fig 9A**). It was also expected that the concentrations of active B  
799 cells (**Fig 9B** and **Fig 9C**), plasma B cells (**Fig 9D**), helper T cells (**Fig 9E** and **Fig 9F**), and  
800 cytotoxic T cells (**Fig 9H** and **Fig 9I**) could steadily increase, reflecting the vaccine's capacity  
801 to create a very high secondary immune response and healthy immune memory. However, **Fig**  
802 **9G** demonstrates that the concentration of regulatory T cells would gradually decrease  
803 throughout the phases of the injections, which represents the decrease in suppression of  
804 vaccine-induced immunity by regulatory T cells [124].

805 In comparison, the rise in macrophage and dendritic cell concentrations showed that these  
806 APCs had a competent presentation of antigen (**Fig 9J** and **Fig 9K**). The simulation result also

807 predicted that the constructed vaccine could generate numerous forms of cytokines, including  
808 IFN- $\gamma$ , IL-23, IL-10, and IFN- $\beta$ ; some of the most critical cytokines for producing an immune  
809 response to viral infections (**Fig 9L**). Therefore, the overall immune simulation analysis  
810 showed that after administration, the proposed polyvalent multi-epitope vaccine would be able  
811 to elicit a robust immunogenic response.

### 812 **3.15. Codon adaptation, *in silico* cloning, and interpretation of the** 813 **vaccine mRNA secondary structure**

814 The protein sequence of the vaccine was adapted by the JCat server for *in-silico* cloning and  
815 plasmid construction. The CAI value was found to be 0.98, suggesting that the DNA sequences  
816 contained a larger proportion of the codons most likely to be included in the target organism's  
817 (K12 strain of *E.coli*) cellular machinery [118, 119]. Furthermore, GC content of the formed  
818 sequence was found to be 50.23 %, within the desired range. The graph demonstrating the  
819 sequence after codon adaptation is shown in **S6 Fig**. Following codon adaptation, the projected  
820 vaccine DNA sequence was inserted between the EaeI and StyI restriction sites into the pETite  
821 vector plasmid. The plasmid includes SUMO and 6X H tag sequences that are required to  
822 promote the vaccine's purification during downstream processing [125]. The newly built  
823 recombinant plasmid has been designated as "Cloned\_pETite" (**Fig 10**). Thereafter, the Mfold  
824 and RNAfold servers predicted the secondary structure of the vaccine mRNA. A minimum free  
825 energy score of -549.30 kcal/mol was produced by the Mfold server, which was consistent with  
826 the prediction of the RNAfold server that also predicted a minimum free energy of -526.30  
827 kcal/mol. In **S7 Fig**, the vaccine mRNA secondary structure is depicted.

828

829 **Fig 10.** *In-silico* cloning of the vaccine sequence in the pETite plasmid vector. The codon  
830 sequence of the final vaccine is presented in red generated by the JCat server. The pETite  
831 expression vector is in black.

832

## 833 **4. Discussion**

834 hRSV is conventionally the most prevalent cause of human LRTIs, known to infect individuals  
835 from all age groups but more commonly newborns and children. Implicated infections of RSV  
836 contribute to affecting and killing numerous people all over the globe, yet no pre-existing  
837 authorized vaccine is recognized as an effective measure to prevent RSV infections. Vaccines  
838 are extensively used to control and prevent diseases caused by a variety of pathogens across  
839 the world. Conventional methods are primarily used for vaccine development and manufacture,  
840 despite the associated disadvantages of being expensive and time-consuming [126]. In contrast  
841 to traditional vaccine production strategies, today's cutting-edge research and technology as  
842 well as the availability of knowledge about the genome and proteome of almost all viruses and  
843 organisms, facilitate the design and development of novel peptide-based subunit vaccines.  
844 Subunit vaccines have the benefit of being able to eliminate toxic and immunogenic  
845 components of an antigen during a vaccine design study, making the vaccine safe to administer  
846 in people. Subunit vaccines include a limited amount of viral particles that cause patients to  
847 develop protective immunity. A subunit vaccine is a cost-efficient and effective way to prevent  
848 health concerns [127-129]. As a result, bioinformatics and immunoinformatics techniques have  
849 been developed and widely utilized to design novel subunit vaccines that are safe, effective,  
850 efficient, and low-cost alternatives to current preventive measures [130, 131].

851

852 The narrated experiment utilized immunoinformatics methods to design a blueprint of a  
853 polyvalent epitope-based vaccine against the antigenic subgroups, RSV-A and RSV-B,  
854 targeting four distinctive proteins which include - P protein, N protein, F protein, and mG  
855 protein. Antigenicity and physicochemical properties of the proteins were predicted, where all  
856 the proteins identified were shown to be antigenic; a requirement for the use of a target protein  
857 in epitope-based vaccine construction. The theoretical pI represents the pH at which there is no  
858 net effective charge and mobility in a protein as well as predicts whether a protein is basic or  
859 acidic [132]. The instability index of a protein represents the likelihood of that specific  
860 compound being stable, and a compound with an instability index greater than 40 is deemed  
861 unstable [133]. The aliphatic index measures the relative amount of amino acids occupied by  
862 aliphatic amino acids in its side chains [134]. The high aliphatic index also indicates the  
863 improved thermal stability of a protein [135]. All of the query proteins had a high extinction  
864 coefficient and theoretical half-life of 30 h in mammalian cells. The extinction coefficient  
865 indicates the ability of a protein to absorb light at a certain wavelength and a higher extinction  
866 coefficient represents the higher absorbance of light by the protein [136, 137]. The GRAVY  
867 value represents a compound's hydrophilic or hydrophobic traits. The GRAVY negative value  
868 reflects hydrophilic characteristics, while the GRAVY positive value reflects the hydrophobic  
869 characteristics of the compound [138, 139]. Since all query proteins were found to be quite  
870 antigenic having a high aliphatic index and extinction coefficient, as well as negative GRAVY  
871 values, they were expected to be thermostable, high light-absorbing as well as hydrophilic in  
872 nature. Overall, the physiological property analyses of the proteins revealed satisfactory results,  
873 desired for the epitope predictions. CTL, HTL, and LBL epitopes are some mandatory  
874 constituents for a multi-epitope subunit vaccine, known to stimulate or activate the cytotoxic  
875 T-cells, helper T-cells, and B-cells to generate an effective host immune response [140].  
876 Cytotoxic T-cells can recognize the foreign antigens while helper T-cells recruit the other

877 immune cells including B-cells, macrophages, and even cytotoxic T-cells to ensure the  
878 generation of immune responses [38, 48]. In addition, B-cells mediate the humoral immune  
879 response by producing immunoglobulins or antibodies that are antigen-specific [50][141, 142].

880 Once the vaccine protein reaches the host antigen-presenting cells (APC), they are processed,  
881 and the T cell epitopes are proteolytically cleaved off the protein, which is then represented by  
882 MHC molecules on the surface of APCs, exposing them to T cell receptors [143]. MHC class  
883 I molecules represent endogenous antigens often referred to as epitopes, such as intracellular  
884 proteins of a pathogen (e.g., bacteria or virus) or any tumor-inducing proteins whereas, MHC  
885 class II molecules represent exogenous epitopes. Furthermore, the antigen region that binds to  
886 the immunoglobulin or antibody is referred to as the B-cell epitope. These B-cell epitopes can  
887 be found in any exposed solvent area of the antigen and can be of various chemical types. The  
888 majority of antigens, however, are proteins, which are the targets of epitope prediction  
889 algorithms. The goal of B-cell epitope prediction is to ensure a more convenient method to  
890 identify B-cell epitopes, to substitute antigen for antibody production by the plasma B-cells, or  
891 conduct structure-function studies. Thus, antibodies can recognize any area of the antigen that  
892 has been exposed to solvents. B-cell epitopes can be split into two categories: linear and  
893 conformational; conformational B-cell epitopes are made up of patches of solvent-exposed  
894 atoms from residues that are not always sequential, while LBL epitopes are made up of  
895 sequential residues. Antibodies that identify LBL epitopes can recognize denatured antigens,  
896 but denaturing the antigen causes conformational B-cell epitopes to lose their recognition  
897 [144]. T-cell and B-cell epitopes have been predicted for the selected RSV proteins using the  
898 IEDB server. The most conserved epitopes with high antigenicity, non-allergenicity, and non-  
899 toxicity were screened for designing the vaccine construct. The broad-spectrum activity of the  
900 vaccine over the selected strains of both RSV-A and RSV-B viruses was assured by the  
901 conservancy of the epitopes.

902 Furthermore, the cytokine-producing ability was considered as a criterion to screen the HTL  
903 epitopes desired for designing the vaccine. Inflammatory mediators, such as cytokines and  
904 chemokines have been linked to RSV pathogenesis. They may be divided into two groups  
905 depending on how they affect immune cells: pro-inflammatory and anti-inflammatory  
906 chemicals [144]. Interleukin (IL)-1, tumor necrosis factor-alpha (TNF- $\alpha$ ), interferon-gamma  
907 (IFN- $\gamma$ ), and interleukin-6 (IL-6) are pro-inflammatory cytokines [145-147]. IL-10 and IL-12  
908 are anti-inflammatory cytokines [148, 149]. IFN- $\gamma$ , on the other hand, has a dual role during  
909 RSV infection; it is essential to decrease viral multiplication while simultaneously inhibiting  
910 airway blockage [150]. IFN- $\gamma$  is well-known for its fundamentally safe responses and potential  
911 to stop viral multiplication [151, 152]. Additionally, IL-4 plays important role in regulating the  
912 responses of lymphocytes, myeloid cells, and non-hematopoietic cells. In T-cells, IL-4 induces  
913 the differentiation of naïve CD4 T cells into Th2 cells, and in B cells, IL-4 drives the  
914 immunoglobulin (Ig) class switch to IgG1 and IgE, and in macrophages, IL-4, as well as IL-  
915 13, induce alternative macrophage activations [153]. Consequently, cytokines including IFN-  
916  $\gamma$ , IL-10, and IL-4 were considered essential during the prediction of the HTL epitopes of the  
917 vaccine which, after administration, might play a crucial role in creating a network between  
918 immune system cells [63]. The population coverage analysis was performed in the following  
919 step. As HLA allelic distribution varies between geographical regions and ethnic groups  
920 throughout the world, it is paramount to consider population coverage while designing a viable  
921 epitope-based vaccine that is pertinent to global populations. According to the population  
922 coverage analysis, the MHC Class-I and Class-II alleles and their epitopes covered 85.70 %  
923 and 87.92 % of the global population, respectively, while the combined MHC Class-I and class-  
924 II alleles and their epitopes covered 84% of the world population. When compared to the  
925 overall population, selected epitopes exhibited a greater individual percentage cover which  
926 indicates the potential worldwide effects of the vaccine against RSV infections.



927

928 The most promising epitopes had been conjugated by specific linkers, i.e. EAAAK, AAY, KK,  
929 and GPGPG. An innate antimicrobial peptide, hBD-3 was used as an adjuvant during the  
930 construction of the vaccine. An adjuvant is considered crucial for designing a subunit vaccine  
931 because it improves the traits of antigenicity, immunogenicity, durability, and longevity of the  
932 subunit vaccine [154]. The hBD-3 was chosen as it could potentially induce TLR-dependent  
933 expression of the co-stimulatory molecules - CD80, CD86, and CD40 on the surface of  
934 monocytes and myeloid dendritic cells [155]. Moreover, by forming a protective barrier of  
935 immobilized surface proteins, hBD-3 can prevent the fusion of the virus [156]. Furthermore, it  
936 activates the APCs through TLR1 and TLR2 [157], stimulates IL-22 [158], TGF- $\alpha$  [159, 160],  
937 and IFN- $\gamma$  [161, 162]. It also facilitates the chemotaxis of immature DCs and T cells through  
938 its interaction with chemokine receptor 6 (CCR6), as well as the chemotaxis of monocytes  
939 through its interaction with CCR2 [163]. This peptide also promotes and activates myeloid  
940 DCs and natural killer (NK) cells [157, 162].

941 Alongside the adjuvant, to strengthen the immunogenic reaction of the vaccine, the PADRE  
942 sequence was also incorporated. The antigenicity, allergenicity, and physicochemical  
943 properties of the constructed vaccine were subsequently identified, which revealed the vaccine  
944 protein to be desirable for further modeling refinement and validation processes. The vaccine  
945 protein was predicted with a theoretical pI of 9.75, indicating that the vaccine protein is basic  
946 and it might belong to the positively charged proteins [132]. The vaccine's GRAVY value was  
947 predicted to be quite negative (-0.362), indicating that the vaccine protein is hydrophilic [138,  
948 139]. Moreover, the instability index was determined to be less than 40 (27.55), implying that  
949 the vaccine is fairly stable. The extinction coefficient which is representative of the light-  
950 absorbing nature, and the aliphatic index which denotes the high stability of the vaccine protein,  
951 were both found to have high values at 45770 M<sup>-1</sup> cm<sup>-1</sup> and 80.85, respectively [133]. Using

952 different online tools to predict the secondary and tertiary structure of the vaccine, it was  
953 revealed that the adjuvant sequences had produced some substantial changes in the predicted  
954 vaccine construct. Furthermore, the secondary structure analysis showed that the vaccine  
955 protein sequence was abundant with the coiled regions as well as the very low amount of  $\beta$ -  
956 strand. This indicates the higher stability and conservation of the predicted vaccine model. The  
957 tertiary structure was modeled and refined once the secondary structure was determined. The  
958 tertiary structure prediction of the vaccine protein revealed a p-value of  $8.71e-05$  in four  
959 domains of the protein, indicating that the predicted 3D structure was quite accurate. The  
960 quality of the vaccine was greatly enhanced following refinement in the context of GDT-HA,  
961 MolProbity, Rama favored amino acid percentage, and z scores, according to the tertiary  
962 structure refinement and validation study. With only a few amino acids in the outlier regions,  
963 the refined structure showed a very high Rama favored amino acid percentage. Following that,  
964 the refined structure was used for disulfide engineering. Furthermore, disulfide engineering of  
965 the vaccine construct has been conducted to increase its stability using the DbD2 v12.2 servers.  
966 The server can determine the B-factor of areas involved in disulfide bonding as well as identify  
967 potential disulfides that increase the protein's thermal stability [92]. All residue pairings in a  
968 given protein structural model are quickly analyzed for closeness and geometry compatible  
969 with disulfide formation, assuming the residues have been changed to cysteines. Similarly, the  
970 experimental result shows residue pairings that match the specified requirements. Engineered  
971 disulfides have been shown to improve protein stability and aid in the study of protein dynamics  
972 and interactions [94]. Three pairs of amino acids have been found by the server which is  
973 predicted to improve the stability of the vaccine construct thereby. However, the vaccine's  
974 possible effectiveness and immunological responses may be reduced if posttranslational  
975 modification, such as glycosylation and phosphorylation, is overlooked during vaccine  
976 development. Glycosylation is a chemical modification of macromolecules in which

977 carbohydrate moieties are covalently bonded to the N or C terminals of lipids and proteins  
978 molecules, resulting in N-linked and O-linked glycosylation [164]. Previous studies have found  
979 that glycosylation significantly improves vaccine immunogenicity when compared to non-  
980 glycosylated vaccinations, and clinical trials are now ongoing [165]. Furthermore,  
981 phosphorylation is the process of adding a phosphate group to macromolecules. Eukaryotes  
982 have a greater frequency of occurrence of posttranslational modifications. Serine and threonine  
983 are two important phosphorylation sites. Phosphorylated peptides or epitopes (synthetic or  
984 natural) are known to be better recognized by cytotoxic T cells, i.e. MHC Class I molecules,  
985 and are therefore directly implicated in the production of particular immune responses [166].  
986 As a result, it is hypothesized that the vaccine construct predicted with multiple  
987 posttranslational modifications will create an efficient immunogenic response against the virus  
988 following vaccine administration.

989 Furthermore, one of the predominant necessities and approaches to designing an effective  
990 vaccine is the molecular docking process. It concludes the probability of contact between the  
991 vaccine and other networking proteins, i.e. TLRs may occur during initial immune response.  
992 TLRs, which are found on leukocytes and in tissues, play a major role in innate immunity  
993 activation by identifying invading pathogens, including viruses like RSV, and sending out  
994 signals that promote inflammation-related components [167]. TLRs, such as TLR2, TLR1,  
995 TLR6, TLR3, and TLR4, are found on leukocytes and can interact with RSV to boost immune  
996 responses [168]. Within the lungs, TLR2 interactions with RSV increase neutrophil migration  
997 and dendritic cell activation. TLR2 exists as a heterodimer complex with either TLR1 or TLR6  
998 on the surface of immune cells and tissues [169]. According to genetic analysis and vaccine  
999 studies, TLR2 signaling appears to be critical in RSV recognition [170-172]. TLR2 and TLR1  
1000 or TLR2 and TLR6 complexes can recognize RSV, and greatly enhance early innate  
1001 inflammatory responses [173-175]. Previous research has also suggested that the signals

1002 generated by TLR2 and TLR6 activation are critical for viral replication control [168]. TLR3  
1003 and TLR4 signaling support the T helper type 1 (Th1) responses, whereas T helper type 2 (Th2)  
1004 responses are favored by TLR2/1, and TLR2/6 signaling [177]. Th1 cells help with responses  
1005 to intracellular pathogens, whereas Th2 cells handle parasitic infections and allergies [178,  
1006 179]. The F glycoprotein of RSV has been reported to induce primarily a Th1-type immune  
1007 response through the interaction with TLR4 [180, 181]. On the other hand, TLR9 has been  
1008 found to improve vaccine immunogenicity and decrease vaccine-enhanced illness during FI-  
1009 RSV immunization. Furthermore, immunomodulation generated by TLR9 agonists verifies  
1010 TLR agonists' adjuvant potential after RSV immunization [182]. Finally, the targeted TLRs are  
1011 all involved in pattern recognition and the innate immune response to RSV, which results in  
1012 the production of proinflammatory cytokines and chemokines [183]. TLRs which are critical  
1013 in the RSV pathogenesis were considered for the docking analysis. Thus, TLR-1, TLR-2, TLR-  
1014 3, TLR-4, and TLR9 have been docked with the vaccine protein which revealed each of the  
1015 TLRs to obtain very low binding energy in different servers and to show strong interaction with  
1016 the vaccine protein according to the results given in the docking analysis. It is evident from the  
1017 docking analysis that the designed vaccine would have a strong affinity with all the target  
1018 TLRs, leading to the possibility that a strong immune response might be induced by the vaccine  
1019 after administration.

1020 In response to external forces exerted by its surrounding environment, MD simulation  
1021 examines the motion and changes in the state of a target protein molecule or complex. In this  
1022 experiment, to get a better insight into their molecular stability, the five docked vaccine-TLR  
1023 complexes were simulated. The experiment revealed that the structures retained appropriate  
1024 levels of deviation. The TLR1-vaccine complex was found to have the least RMSD compared  
1025 to other complexes; the TLR4-vaccine complex had higher RMSD despite having a similar  
1026 number of chains. The result of RMSD represents the stability of TLR1 and TLR9 vaccine

1027 complexes. Despite 3 chains *viz.* Chain A, chain B, and vaccine chain in the TLR1-vaccine  
1028 complex, the resultant RMSD, suggest reasonable stability. Furthermore, The RMSF analysis  
1029 suggests the residues in the range 190-240 and 480-530 are having large magnitudes of  
1030 fluctuations in all the complexes. The TLR3-vaccine complex showed slightly larger  
1031 fluctuating side chains than other complexes. The results of the total Rg analysis suggest that  
1032 the total Rg of the TLR1-vaccine complex almost remained constant throughout the simulation.  
1033 The total Rg of the TLR4-vaccine complex was found lower; however, it deviated throughout  
1034 the simulation. Though both these TLRs have two chains of proteins along with vaccine chains,  
1035 TLR1 Rg seemed quite stable, while the other TLR systems (TLR2, TLR3) also seemed to be  
1036 quite compact, and there were no evident secondary structural changes in these TLRs. In the  
1037 non-bonded interaction analysis, in the case of TLR1-vaccine complex, it is found that around  
1038 10 hydrogen bonds were formed till around 50 ns MD time interval, which steadily lowers to  
1039 around 5 hydrogen bonds till 80 ns and thereafter rises to 10 hydrogen bonds. The TLR2-  
1040 vaccine complex has around 7 hydrogen bonds being constantly formed throughout the MD  
1041 simulation, while TLR3 and TLR9 complexes with vaccines have around 10 hydrogen bonds  
1042 constantly formed. These complexes have strong hydrogen bond networks at the interface of  
1043 TLRs and vaccines. The TLR4-vaccine complex has around 5 hydrogen bonds formed which  
1044 are fewer in number compared to other systems. Actual residues involved in the hydrogen bond  
1045 formation as investigated in the last trajectory are tabulated in the **S7 Table**.

1046

1047 The immune simulation analysis of the proposed vaccine demonstrated that the vaccine could  
1048 induce an immune response compatible with the natural host immune system. Both humoral  
1049 and cell-mediated responses may be activated by the vaccine, as shown by an elevation in the  
1050 levels of memory B cells, plasma B cells, cytotoxic T cells, helper T cells, and various  
1051 antibodies. Adaptive immunity is an immunity that occurs after exposure to an antigen either

1052 from a pathogen or a vaccination. A vaccine can generate adaptive immunity against the  
1053 pathogen by which it may restrict or prevent the infection. The vaccine-provided activation of  
1054 helper T cells resulted in strong adaptive immunity [184-186]. Again, a very strong antigen  
1055 presentation was also demonstrated in the simulation study by the rise in the concentration of  
1056 APCs such as macrophages and dendritic cells. In addition, enrichment in the cytokine profile  
1057 that plays a crucial role in providing broad-spectrum immunity against viral invasions [186-  
1058 189] has also been identified in the analysis [66]. Moreover, the gradual increase in the level  
1059 of different mucosal immunoglobulins i.e. IgG1 + IgG2, and IgG + IgM antibodies throughout  
1060 the vaccine doses or injections were also predicted. The mucosal immune system is the  
1061 dominant part of the immune system, having developed to protect the mucosae in the upper  
1062 respiratory tract, which are the primary sites of respiratory infection. Being a respiratory virus,  
1063 RSV initially affects the upper respiratory tract, due to which the immune system may be  
1064 stimulated against the virus predominantly at the mucosal surfaces [190]. Previous clinical  
1065 studies also reported IgG and IgM to be significant role players against RSV infections [191].  
1066 Furthermore, the simulation analysis revealed that the concentration of regulatory T cells would  
1067 gradually decrease throughout the phases of the vaccine doses which indicates the potential  
1068 decrease in suppression of vaccine-induced immunity by regulatory T cells [192].

1069 Hence, the proposed vaccine construct is predicted to produce an effective immunogenic  
1070 response after the vaccine injections, according to the analysis of the immune simulation. The  
1071 codon adaptation and subsequent *in silico* cloning studies were conducted to identify the  
1072 potential codons required for the generation of a recombinant plasmid that could be used to  
1073 express the vaccine in the *E. coli* strain K12, leading to the mass manufacturing efforts of the  
1074 vaccine in the near future. The *E.coli* cell culture system is considered to be the majorly  
1075 recommended system for the production of recombinant proteins at a mass level. In the codon  
1076 adaptation analysis, the obtained results were significantly good with a CAI value of 0.98 and

1077 a GC content of 50.23 %, since any CAI value above 0.80 and a GC content of 30% to 70%  
1078 are considered to be the most promising scores [34, 186, 193]. Following this, the optimized  
1079 vaccine DNA sequence was inserted into the pETite plasmid vector using Snapgene restriction  
1080 cloning software. The pETite plasmid vector contains SUMO tag and 6X His tag which might  
1081 be fused with the vaccine codon sequence during the *in silico* cloning process. This may lead  
1082 to the expression of these tags within the protein itself, which could promote the purification  
1083 and downstream processing of the vaccine. Prediction of the stability of the vaccine mRNA  
1084 secondary structure using the Mfold and RNAfold servers provided with the negative and much  
1085 lower minimal free energies of -549.30 and -526.30 kcal/mol, respectively. The lower minimal  
1086 free energy is often considered better than the higher maximal free energy score which indicates  
1087 the protein to be more stable. It can, therefore, be reported that the predicted vaccine could be  
1088 very stable upon transcription [133]. Overall, this study suggests that the proposed vaccine  
1089 peptide could be utilized as a potential and successful protective measure against both RSV-A  
1090 and RSV-B subtypes. However, to eventually validate its immunogenicity, efficacy, stability,  
1091 safety, and various biophysical characteristics, further research approaches, and  
1092 implementations are recommended.

1093

## 1094 **5. Conclusion**

1095 RSV is predominantly one of the major contributors of diseases of the LRTI, including  
1096 pneumonia and bronchiolitis, responsible for infecting people of all ages as well as  
1097 immunocompromised individuals with a high infection rate. Millions of individuals eventually  
1098 end up being diagnosed with this virus every year, and a huge proportion of them require to be  
1099 hospitalized. While research for an effective countermeasure to tackle this virus has been  
1100 ongoing for the past few decades, no approved vaccine is still commercially available.

1101 Moreover, the antiviral drugs now available often struggle to show any effective outcomes  
1102 during therapy. Therefore, a potential epitope-based polyvalent vaccine against both forms of  
1103 RSV, RSV-A, and RSV-B, was designed in this research using the techniques of  
1104 immunoinformatics and *in-silico* biology. The vaccine included the T-cell and B-cell epitopes  
1105 that were 100% conserved; they could therefore be efficient against the two selected viruses.  
1106 In addition, high antigenicity, non-allergenicity, and non-toxicity as well as non-homology (to  
1107 the human proteome) were also considered to be the criteria for choosing the most promising  
1108 epitopes for the final construction of the vaccine, so that the vaccine could deliver a very strong  
1109 immunogenic response without triggering any adverse reaction inside the body. The results of  
1110 the various analyses conducted in the study revealed that the polyvalent vaccine should be very  
1111 safe, efficient, and responsive to use. The tools utilized in this study are well accepted and yield  
1112 highly accurate results. Therefore, the findings of this study can point researchers in the  
1113 direction of novel vaccine development tactics. Researchers could investigate the predicted  
1114 epitopes and their probable immunogenic response elicited in the host system when looking  
1115 into further subunit vaccine development or other prevention strategies against RSV infection.  
1116 However, as all these predictions were focused solely on computational techniques, it is  
1117 important to perform further wet laboratory-based experiments to validate the findings of this  
1118 analysis. With high-cost criteria and numerous drawbacks in improving the preparation of a  
1119 live, attenuated, or inactivated vaccine for such highly infectious agents, candidates for peptide-  
1120 based vaccines, such as the one designed in this study, maybe comparatively cheap and an  
1121 efficient alternative to reach the entire world as a polyvalent vaccine to fight the challenge of  
1122 RSV infections.

## 1123 **6. Acknowledgements**

1124 Authors are thankful to the Department of Pharmaceutical Chemistry, Sinhgad College of  
1125 Pharmacy, Maharashtra, India, Department of Genetic Engineering and Biotechnology,



1126 University of Chittagong, Chattogram, Bangladesh and Swift Integrity Computational Lab,  
1127 Dhaka, Bangladesh, a virtual platform of young researchers, for providing support to  
1128 successfully carry out the research.

## 1129 **7. Declarations**

### 1130 **Ethics approval and consent to participate**

1131 Not Applicable

### 1132 **Consent for publication**

1133 Not Applicable

### 1134 **Availability of data and material**

1135 All the data generated during the experiment are provided in the manuscript/supplementary  
1136 material.

### 1137 **Competing interests**

1138 The authors declare that they have no conflict of interest regarding the publication of the paper.

### 1139 **Funding**

1140 No funding was received from any external sources.

1141

1142

1143

1144

1145

1146

## 1147 8. References

- 1148 1. Meng J, Stobart CC, Hotard AL, Moore ML. An overview of respiratory syncytial virus.  
1149 PLoS Pathog. 2014 Apr 24;10(4):e1004016.  
1150 <https://doi.org/10.1371/journal.ppat.1004016>  
1151 PMID:24763387 PMCID:PMC3999198  
1152
- 1153 2. Clark CM, Guerrero-Plata A. Respiratory syncytial virus vaccine approaches: a current  
1154 overview. Current clinical microbiology reports. 2017 Dec 1;4(4):202-7  
1155 <https://doi.org/10.1007/s40588-017-0074-6>  
1156 PMID:30009126 PMCID:PMC6040676  
1157
- 1158 3. Killikelly A, Tunis M, House A, Quach C, Vaudry W, Moore D. Respiratory syncytial virus:  
1159 Overview of the respiratory syncytial virus vaccine candidate pipeline in Canada. Canada  
1160 Communicable Disease Report. 2020 Apr 2;46(4):56  
1161 <https://doi.org/10.14745/ccdr.v46i04a01>  
1162 PMID:32510521 PMCID:PMC7273503  
1163
- 1164 4. Schmidt ME, Varga SM. Modulation of the host immune response by respiratory syncytial  
1165 virus proteins. Journal of Microbiology. 2017 Mar 1;55(3):161-71.  
1166 <https://doi.org/10.1007/s12275-017-7045-8>  
1167 PMID:28243940  
1168
- 1169 5. Bakre AA, Harcourt JL, Haynes LM, Anderson LJ, Tripp RA. The central conserved region  
1170 (CCR) of respiratory syncytial virus (RSV) G protein modulates host miRNA expression and  
1171 alters the cellular response to infection. Vaccines. 2017 Sep;5(3):16.  
1172 <https://doi.org/10.3390/vaccines5030016>  
1173 PMID:28671606 PMCID:PMC5620547  
1174
- 1175 6. Harcourt J, Alvarez R, Jones LP, Henderson C, Anderson LJ, Tripp RA. Respiratory  
1176 syncytial virus G protein and G protein CX3C motif adversely affect CX3CR1+ T cell  
1177 responses. The Journal of Immunology. 2006 Feb 1;176(3):1600-8.  
1178 <https://doi.org/10.4049/jimmunol.176.3.1600>  
1179 PMID:16424189  
1180
- 1181 7. Bergeron HC, Murray J, Castrejon AM, DuBois RM, Tripp RA. Respiratory Syncytial Virus  
1182 (RSV) G Protein Vaccines With Central Conserved Domain Mutations Induce CX3C-CX3CR1  
1183 Blocking Antibodies. Viruses. 2021 Feb;13(2):352.  
1184 <https://doi.org/10.3390/v13020352>  
1185 PMID:33672319 PMCID:PMC7926521  
1186
- 1187 8. Eshaghi A, Duvvuri VR, Lai R, Nadarajah JT, Li A, Patel SN, Low DE, Gubbay JB. Genetic  
1188 variability of human respiratory syncytial virus A strains circulating in Ontario: a novel  
1189 genotype with a 72 nucleotide G gene duplication. PloS one. 2012 Mar 28;7(3):e32807.  
1190 <https://doi.org/10.1371/journal.pone.0032807>  
1191 PMID:22470426 PMCID:PMC3314658

- 1192  
1193 9. Yoshihara K, Le MN, Okamoto M, Wadagni AC, Nguyen HA, Toizumi M, Pham E, Suzuki  
1194 M, Nguyen AT, Oshitani H, Ariyoshi K. Association of RSV-A ON1 genotype with increased  
1195 pediatric acute lower respiratory tract infection in Vietnam. *Scientific Reports*. 2016 Jun  
1196 16;6(1):1-0.  
1197 <https://doi.org/10.1038/srep27856>  
1198 PMID:27306333 PMCID:PMC4910061  
1199  
1200 10. Chirkova T, Boyoglu-Barnum S, Gaston KA, Malik FM, Trau SP, Oomens AG, Anderson  
1201 LJ. Respiratory syncytial virus G protein CX3C motif impairs human airway epithelial and  
1202 immune cell responses. *Journal of virology*. 2013 Dec 15;87(24):13466-79.  
1203 <https://doi.org/10.1128/JVI.01741-13>  
1204 PMID:24089561 PMCID:PMC3838285  
1205  
1206 11. Resch B. Product review on the monoclonal antibody palivizumab for prevention of  
1207 respiratory syncytial virus infection. *Human vaccines & immunotherapeutics*. 2017 Sep  
1208 2;13(9):2138-49.  
1209 <https://doi.org/10.1080/21645515.2017.1337614>  
1210 PMID:28605249 PMCID:PMC5612471  
1211  
1212 12. IMPact-RSV Study Group\*. Palivizumab, a humanized respiratory syncytial virus  
1213 monoclonal antibody, reduces hospitalization from respiratory syncytial virus infection in  
1214 high-risk infants. *Pediatrics*. 1998 Sep 1;102(3):531-7.  
1215 <https://doi.org/10.1542/peds.102.3.531>  
1216  
1217  
1218 13. Bergeron HC, Tripp RA. Emerging small and large molecule therapeutics for respiratory  
1219 syncytial virus. *Expert opinion on investigational drugs*. 2020 Mar 3;29(3):285-94.  
1220 <https://doi.org/10.1080/13543784.2020.1735349>  
1221 PMID:32096420  
1222  
1223 14. Bianchini S, Silvestri E, Argentiero A, Fainardi V, Pisi G, Esposito S. Role of Respiratory  
1224 Syncytial Virus in Pediatric Pneumonia. *Microorganisms*. 2020 Dec;8(12):2048.  
1225 <https://doi.org/10.3390/microorganisms8122048>  
1226 PMID:33371276 PMCID:PMC7766387  
1227  
1228 15. Falsey AR, Walsh EE. Respiratory syncytial virus infection in elderly adults. *Drugs &*  
1229 *aging*. 2005 Jul;22(7):577-87.  
1230 <https://doi.org/10.2165/00002512-200522070-00004>  
1231 PMID:16038573 PMCID:PMC7099998  
1232  
1233 16. Agoti CN, Phan MV, Munywoki PK, Githinji G, Medley GF, Cane PA, Kellam P, Cotten  
1234 M, Nokes DJ. Genomic analysis of respiratory syncytial virus infections in households and  
1235 utility in inferring who infects the infant. *Scientific reports*. 2019 Jul 11;9(1):1-4  
1236 <https://doi.org/10.1038/s41598-019-46509-w>  
1237 PMID:31296922 PMCID:PMC6624209

1238

1239 17. Kim HW, Canchola JG, Brandt CD, Pyles G, Chanock RM, Jensen K, Parrott RH.  
1240 Respiratory syncytial virus disease in infants despite prior administration of antigenic  
1241 inactivated vaccine. *American journal of epidemiology*. 1969 Apr 1;89(4):422-34.

1242 <https://doi.org/10.1093/oxfordjournals.aje.a120955>

1243 PMID:4305198

1244

1245 18. Fulginiti VA, Eller JJ, Sieber OF, Joyner JW, Minamitani M, Meiklejohn G. Respiratory  
1246 virus immunization: A field trial of two inactivated respiratory virus vaccines; an aqueous  
1247 trivalent parainfluenza virus vaccine and an alum-precipitated Respiratory Syncytial Virus  
1248 vaccine. *American journal of epidemiology*. 1969 Apr 1;89(4):435-48.

1249 <https://doi.org/10.1093/oxfordjournals.aje.a120956>

1250 PMID:4305199

1251

1252 19. CHIN J, MAGOFFIN RL, SHEARER LA, SCHIEBLE JH, LENNETTE EH. Field  
1253 evaluation of a respiratory syncytial virus vaccine and a trivalent parainfluenza virus vaccine  
1254 in a pediatric population. *American journal of epidemiology*. 1969 Apr 1;89(4):449-63.

1255 <https://doi.org/10.1093/oxfordjournals.aje.a120957>

1256 PMID:4305200

1257

1258 20. Kapikian AZ, Mitchell RH, Chanock RM, Shvedoff RA, Stewart CE. An epidemiologic  
1259 study of altered clinical reactivity to respiratory syncytial (RS) virus infection in children  
1260 previously vaccinated with an inactivated RS virus vaccine. *American journal of epidemiology*.  
1261 1969 Apr 1;89(4):405-21.

1262 <https://doi.org/10.1093/oxfordjournals.aje.a120954>

1263 PMID:4305197

1264

1265 21. Kim HW, Arrobio JO, Pyles G, Brandt CD, Camargo E, Chanock RM, Parrott RH. Clinical  
1266 and immunological response of infants and children to administration of low-temperature  
1267 adapted respiratory syncytial virus. *Pediatrics*. 1971 Nov 1;48(5):745-55.

1268 <https://doi.org/10.1542/peds.48.5.745>

1269 PMID:4330595

1270

1271 22. Olson MR, Varga SM. CD8 T cells inhibit respiratory syncytial virus (RSV) vaccine-  
1272 enhanced disease. *The Journal of Immunology*. 2007 Oct 15;179(8):5415-24.

1273 <https://doi.org/10.4049/jimmunol.179.8.5415>

1274 PMID:17911628

1275

1276 23. Olson MR, Hartwig SM, Varga SM. The number of respiratory syncytial virus (RSV)-  
1277 specific memory CD8 T cells in the lung is critical for their ability to inhibit RSV vaccine-  
1278 enhanced pulmonary eosinophilia. *The Journal of Immunology*. 2008 Dec 1;181(11):7958-68.

1279 <https://doi.org/10.4049/jimmunol.181.11.7958>

1280 PMID:19017987 PMCID:PMC2587004

1281

- 1282 24. Knudson CJ, Hartwig SM, Meyerholz DK, Varga SM. RSV vaccine-enhanced disease is  
1283 orchestrated by the combined actions of distinct CD4 T cell subsets. *PLoS pathogens*. 2015  
1284 Mar 13;11(3):e1004757.  
1285 <https://doi.org/10.1371/journal.ppat.1004757>  
1286 PMID:25769044 PMCID:PMC4358888  
1287
- 1288 25. Delgado MF, Coviello S, Monsalvo AC, Melendi GA, Hernandez JZ, Batalle JP, Diaz L,  
1289 Trento A, Chang HY, Mitzner W, Ravetch J. Lack of antibody affinity maturation due to poor  
1290 Toll-like receptor stimulation leads to enhanced respiratory syncytial virus disease. *Nature*  
1291 *medicine*. 2009 Jan;15(1):34-41.  
1292 <https://doi.org/10.1038/nm.1894>  
1293 PMID:19079256 PMCID:PMC2987729  
1294
- 1295 26. Karron RA, Wright PF, Crowe Jr JE, Mann ML, Thompson J, Makhene M, Casey R,  
1296 Murphy BR. Evaluation of two live, cold-passaged, temperature-sensitive respiratory syncytial  
1297 virus vaccines in chimpanzees and in human adults, infants, and children. *Journal of Infectious*  
1298 *Diseases*. 1997 Dec 1;176(6):1428-36.  
1299 <https://doi.org/10.1086/514138>  
1300 PMID:9395351  
1301
- 1302 27. Gomez M, Mufson MA, Dubovsky F, Knightly C, Zeng W, Losonsky G. Phase-I study  
1303 MEDI-534, of a live, attenuated intranasal vaccine against respiratory syncytial virus and  
1304 parainfluenza-3 virus in seropositive children. *The Pediatric infectious disease journal*. 2009  
1305 Jul 1;28(7):655-8.  
1306 <https://doi.org/10.1097/INF.0b013e318199c3b1>  
1307 PMID:19483659  
1308
- 1309 28. Ascough S, Vlachantoni I, Kalyan M, Haijema BJ, Wallin-Weber S, Dijkstra-Tiekstra M,  
1310 Ahmed MS, Van Roosmalen M, Grimaldi R, Zhang Q, Leenhouts K. Local and systemic  
1311 immunity against respiratory syncytial virus induced by a novel intranasal vaccine. A  
1312 randomized, double-blind, placebo-controlled clinical trial. *American journal of respiratory*  
1313 *and critical care medicine*. 2019 Aug 15;200(4):481-92.  
1314 <https://doi.org/10.1164/rccm.201810-1921OC>  
1315 PMID:30753101 PMCID:PMC6701032  
1316
- 1317 29. Shafique M, Zahoor MA, Arshad MI, Aslam B, Siddique AB, Rasool MH, Qamar MU,  
1318 Usman M. Hurdles in Vaccine Development against Respiratory Syncytial Virus. In *The*  
1319 *Burden of Respiratory Syncytial Virus Infection in the Young* 2019 Aug 1. IntechOpen.  
1320 <https://doi.org/10.5772/intechopen.87126>  
1321  
1322
- 1323 30. Xing Y, Proesmans M. New therapies for acute RSV infections: where are we?. *European*  
1324 *journal of pediatrics*. 2019 Feb 12;178(2):131-8.  
1325 <https://doi.org/10.1007/s00431-018-03310-7>  
1326 PMID:30610420  
1327

- 1328 31. Griffiths C, Drews SJ, Marchant DJ. Respiratory syncytial virus: infection, detection, and  
1329 new options for prevention and treatment. *Clinical microbiology reviews*. 2017 Jan  
1330 1;30(1):277-319.  
1331 <https://doi.org/10.1128/CMR.00010-16>  
1332 PMID:27903593 PMCID:PMC5217795  
1333
- 1334 32. Jordan R, Shao M, Mackman RL, Perron M, Cihlar T, Lewis SA, Eisenberg EJ, Carey A,  
1335 Strickley RG, Chien JW, Anderson ML. Antiviral efficacy of a respiratory syncytial virus  
1336 (RSV) fusion inhibitor in a bovine model of RSV infection. *Antimicrobial agents and*  
1337 *chemotherapy*. 2015 Aug 1;59(8):4889-900  
1338 <https://doi.org/10.1128/AAC.00487-15>  
1339 PMID:26055364 PMCID:PMC4505261  
1340
- 1341 33. María, R.R., Arturo, C.J., Alicia, J.A., Paulina, M.G., Gerardo, A.O., 2017. The impact of  
1342 bioinformatics on vaccine design and development. InTech, Rijeka, Croatia.  
1343 <https://doi.org/10.5772/intechopen.69273>  
1344  
1345
- 1346 34. Sarkar B, Ullah MA, Araf Y, Das S, Hosen MJ. Blueprint of epitope-based multivalent and  
1347 multipathogenic vaccines: targeted against the dengue and zika viruses. *Journal of*  
1348 *Biomolecular Structure and Dynamics*. 2020a Aug 7:1-21.  
1349 <https://doi.org/10.1080/07391102.2020.1804456>  
1350 PMID:32772811  
1351
- 1352 35. Rappuoli R. Reverse vaccinology. *Current opinion in microbiology*. 2000 Oct 1;3(5):445-  
1353 50.  
1354 [https://doi.org/10.1016/S1369-5274\(00\)00119-3](https://doi.org/10.1016/S1369-5274(00)00119-3)  
1355  
1356
- 1357 36. Rappuoli, R., Bottomley, M.J., D'Oro, U., Finco, O., De Gregorio, E., 2016. Reverse  
1358 vaccinology 2.0: Human immunology instructs vaccine antigen design. *J. Exp. Med.* 213, 469-  
1359 481.  
1360 <https://doi.org/10.1084/jem.20151960>  
1361 PMID:27022144 PMCID:PMC4821650  
1362
- 1363 37. Chong, L.C. and Khan, A.M., 2019. Vaccine Target Discovery.  
1364 <https://doi.org/10.1016/B978-0-12-809633-8.20100-3>  
1365 PMCID:PMC7148608  
1366
- 1367 38. Collins PL, Fearn R, Graham BS. Respiratory syncytial virus: virology, reverse genetics,  
1368 and pathogenesis of disease. In *Challenges and opportunities for respiratory syncytial virus*  
1369 *vaccines 2013* (pp. 3-38). Springer, Berlin, Heidelberg.  
1370 [https://doi.org/10.1007/978-3-642-38919-1\\_1](https://doi.org/10.1007/978-3-642-38919-1_1)  
1371 PMID:24362682 PMCID:PMC4794264  
1372

- 1373 39. Steff AM, Monroe J, Friedrich K, Chandramouli S, Nguyen TL, Tian S, Vandepaer S,  
1374 Toussaint JF, Carfi A. Pre-fusion RSV F strongly boosts pre-fusion specific neutralizing  
1375 responses in cattle pre-exposed to bovine RSV. *Nature communications*. 2017 Oct 20;8(1):1-  
1376 0.  
1377 <https://doi.org/10.1038/s41467-017-01092-4>  
1378 PMID:29057917 PMCID:PMC5651886  
1379
- 1380 40. McLellan JS, Ray WC, Peeples ME. Structure and function of respiratory syncytial virus  
1381 surface glycoproteins. Challenges and opportunities for respiratory syncytial virus vaccines.  
1382 2013:83-104.  
1383 [https://doi.org/10.1007/978-3-642-38919-1\\_4](https://doi.org/10.1007/978-3-642-38919-1_4)  
1384 PMID:24362685 PMCID:PMC4211642  
1385
- 1386 41. Arbiza J, Taylor G, López JA, Furze J, Wyld S, Whyte P, Stott EJ, Wertz G, Sullender W,  
1387 Trudel M, Melero JA. Characterization of two antigenic sites recognized by neutralizing  
1388 monoclonal antibodies directed against the fusion glycoprotein of human respiratory syncytial  
1389 virus. *Journal of General Virology*. 1992 Sep 1;73(9):2225-34.  
1390 <https://doi.org/10.1099/0022-1317-73-9-2225>  
1391 PMID:1383404  
1392
- 1393 42. Lopez JA, Bustos R, Örvell C, Berois M, Arbiza J, García-Barreno B, Melero JA. Antigenic  
1394 structure of human respiratory syncytial virus fusion glycoprotein. *Journal of virology*. 1998  
1395 Aug 1;72(8):6922-8.  
1396 <https://doi.org/10.1128/JVI.72.8.6922-6928.1998>  
1397 PMID:9658147 PMCID:PMC109907  
1398
- 1399 43. López JA, Peñas CO, García-Barreno BL, Melero JA, Portela A. Location of a highly  
1400 conserved neutralizing epitope in the F glycoprotein of human respiratory syncytial virus.  
1401 *Journal of virology*. 1990 Feb;64(2):927-30.  
1402 <https://doi.org/10.1128/jvi.64.2.927-930.1990>  
1403 PMID:1688629 PMCID:PMC249192  
1404
- 1405 44. Lu B, Ma CH, Brazas R, Jin H. The major phosphorylation sites of the respiratory syncytial  
1406 virus phosphoprotein are dispensable for virus replication in vitro. *Journal of virology*. 2002  
1407 Nov 1;76(21):10776-84  
1408 <https://doi.org/10.1128/JVI.76.21.10776-10784.2002>  
1409 PMID:12368320 PMCID:PMC136636  
1410
- 1411 45. Doytchinova, I.A., Flower, D.R., 2007. VaxiJen: a server for prediction of protective  
1412 antigens, tumour antigens and subunit vaccines. *BMC Bioinform*. 8, 4.  
1413 <https://doi.org/10.1186/1471-2105-8-4>  
1414 PMID:17207271 PMCID:PMC1780059  
1415
- 1416 46. Gasteiger, E., Hoogland, C., Gattiker, A., Wilkins, M.R., Appel, R.D. and Bairoch, A.,  
1417 2005. Protein identification and analysis tools on the ExPASy server. In *The proteomics*  
1418 *protocols handbook* (pp. 571-607). Humana press.

1419 <https://doi.org/10.1385/1-59259-890-0:571>

1420

1421

1422 47. Clem AS. Fundamentals of vaccine immunology. *Journal of global infectious diseases*.  
1423 2011 Jan;3(1):73.

1424 <https://doi.org/10.4103/0974-777X.77299>

1425 PMID:21572612 PMCID:PMC3068582

1426

1427 48. Chaudhri, G., Quah, B.J., Wang, Y., Tan, A.H., Zhou, J., Karupiah, G. and Parish, C.R.,  
1428 2009. T cell receptor sharing by cytotoxic T lymphocytes facilitates efficient virus control.  
1429 *Proceedings of the National Academy of Sciences*, 106(35), pp.14984-14989.

1430 <https://doi.org/10.1073/pnas.0906554106>

1431 PMID:19706459 PMCID:PMC2736460

1432

1433 49. Zhu, J. and Paul, W.E., 2008. CD4 T cells: fates, functions, and faults. *Blood, The Journal*  
1434 *of the American Society of Hematology*, 112(5), pp.1557-1569.

1435 <https://doi.org/10.1182/blood-2008-05-078154>

1436 PMID:18725574 PMCID:PMC2518872

1437

1438 50. Cooper, N.R. and Nemerow, G.R., 1984. The role of antibody and complement in the  
1439 control of viral infections. *Journal of investigative dermatology*, 83(s 1), pp.121-127.

1440 <https://doi.org/10.1038/jid.1984.33>

1441

1442

1443 51. Sun P, Ju H, Liu Z, Ning Q, Zhang J, Zhao X, Huang Y, Ma Z, Li Y. Bioinformatics  
1444 resources and tools for conformational B-cell epitope prediction. *Computational and*  
1445 *mathematical methods in medicine*. 2013 Jul 21;2013.

1446 <https://doi.org/10.1155/2013/943636>

1447 PMID:23970944 PMCID:PMC3736542

1448

1449 52. Zhang J, Zhao X, Sun P, Gao B, Ma Z. Conformational B-cell epitopes prediction from  
1450 sequences using cost-sensitive ensemble classifiers and spatial clustering. *BioMed research*  
1451 *international*. 2014 Jun 17;2014.

1452 <https://doi.org/10.1155/2014/689219>

1453 PMID:25045691 PMCID:PMC4083607

1454

1455 53. Vita R, Mahajan S, Overton JA, Dhanda SK, Martini S, Cantrell JR, Wheeler DK, Sette A,  
1456 Peters B. The Immune Epitope Database (IEDB): 2018 update. *Nucleic Acids Res*. 2018 Oct  
1457 24.

1458 <https://doi.org/10.1093/nar/gky1006>

1459 PMID:30357391 PMCID:PMC6324067

1460

1461 54. Jespersen MC, Peters B, Nielsen M, Marcatili P. BepiPred-2.0: improving sequence-based  
1462 B-cell epitope prediction using conformational epitopes. *Nucleic acids research*. 2017 Jul  
1463 3;45(W1):W24-9.

1464 <https://doi.org/10.1093/nar/gkx346>



- 1465 PMid:28472356 PMCID:PMC5570230  
1466  
1467 55. Gruber AR, Lorenz R, Bernhart SH, Neuböck R, Hofacker IL. The vienna RNA websuite.  
1468 Nucleic acids research. 2008 Apr 19;36(suppl\_2):W70-4.  
1469 <https://doi.org/10.1093/nar/gkn188>  
1470 PMid:18424795 PMCID:PMC2447809  
1471  
1472 56. Ponomarenko J, Bui HH, Li W, Fusseder N, Bourne PE, Sette A, Peters B. ElliPro: a new  
1473 structure-based tool for the prediction of antibody epitopes. BMC bioinformatics. 2008  
1474 Dec;9(1):1-8.  
1475 <https://doi.org/10.1186/1471-2105-9-514>  
1476 PMid:19055730 PMCID:PMC2607291  
1477  
1478 57. Bibi S, Ullah I, Zhu B, Adnan M, Liaqat R, Kong WB, Niu S. In silico analysis of epitope-  
1479 based vaccine candidate against tuberculosis using reverse vaccinology. Scientific Reports.  
1480 2021 Jan 13;11(1):1-6.  
1481 <https://doi.org/10.1038/s41598-020-80899-6>  
1482 PMid:33441913 PMCID:PMC7807040  
1483  
1484 58. Bui HH, Sidney J, Li W, Fusseder N, Sette A. Development of an epitope conservancy  
1485 analysis tool to facilitate the design of epitope-based diagnostics and vaccines. BMC  
1486 bioinformatics. 2007 Dec 1;8(1):361.  
1487 <https://doi.org/10.1186/1471-2105-8-361>  
1488 PMid:17897458 PMCID:PMC2233646  
1489  
1490 59. Dimitrov, I., Flower, D.R. and Doytchinova, I., 2013, April. AllerTOP-a server for in-silico  
1491 prediction of allergens. In BMC bioinformatics (Vol. 14, No. 6, p. S4). BioMed Central.  
1492 <https://doi.org/10.1186/1471-2105-14-S6-S4>  
1493 PMid:23735058 PMCID:PMC3633022  
1494  
1495 60. Dimitrov, I., Naneva, L., Doytchinova, I. and Bangov, I., 2014. AllergenFP: allergenicity  
1496 prediction by descriptor fingerprints. Bioinformatics, 30(6), pp.846-851.  
1497 <https://doi.org/10.1093/bioinformatics/btt619>  
1498 PMid:24167156  
1499  
1500 61. Gupta, S., Kapoor, P., Chaudhary, K., Gautam, A. and Kumar, R., 2013. Consortium,  
1501 OSDD; Raghava, GPS In-silico Approach for Predicting Toxicity of Peptides and Proteins.  
1502 PLoS One, 8, p.e73957  
1503 <https://doi.org/10.1371/journal.pone.0073957>  
1504 PMid:24058508 PMCID:PMC3772798  
1505  
1506 62. Krogh, A., Larsson, B., Von Heijne, G., & Sonnhammer, E. L. (2001). Predicting  
1507 transmembrane protein topology with a hidden Markov model: Application to complete  
1508 genomes. Journal of Molecular Biology, 305(3), 567-580.  
1509 <https://doi.org/10.1006/jmbi.2000.4315>  
1510 PMid:11152613

- 1511  
1512 63. Luckheeram, R.V., Zhou, R., Verma, A.D. and Xia, B., 2012. CD4+ T cells: differentiation  
1513 and functions. *Clinical and developmental immunology*, 2012.  
1514 <https://doi.org/10.1155/2012/925135>  
1515 PMID:22474485 PMCID:PMC3312336  
1516  
1517 64. Dhanda SK, Gupta S, Vir P, Raghava GP. Prediction of IL4 inducing peptides. *Clinical and*  
1518 *Developmental Immunology*. 2013 Oct;2013.  
1519 <https://doi.org/10.1155/2013/263952>  
1520 PMID:24489573 PMCID:PMC3893860  
1521  
1522 65. Dhanda SK, Vir P, Raghava GP. Designing of interferon-gamma inducing MHC class-II  
1523 binders. *Biology direct*. 2013 Dec;8(1):30.  
1524 <https://doi.org/10.1186/1745-6150-8-30>  
1525 PMID:24304645 PMCID:PMC4235049  
1526  
1527 66. Nagpal G, Usmani SS, Dhanda SK, Kaur H, Singh S, Sharma M, Raghava GP. Computer-  
1528 aided designing of immunosuppressive peptides based on IL-10 inducing potential. *Scientific*  
1529 *reports*. 2017 Feb 17;7:42851.  
1530 <https://doi.org/10.1038/srep42851>  
1531 PMID:28211521 PMCID:PMC5314457  
1532  
1533 67. Mehla, K. and Ramana, J., 2016. Identification of epitope-based peptide vaccine candidates  
1534 against enterotoxigenic *Escherichia coli*: a comparative genomics and immunoinformatics  
1535 approach. *Molecular BioSystems*, 12(3), pp.890-901.  
1536 <https://doi.org/10.1039/C5MB00745C>  
1537 PMID:26766131  
1538  
1539 68. Thomsen M, Lundegaard C, Buus S, Lund O, Nielsen M. MHCcluster, a method for  
1540 functional clustering of MHC molecules. *Immunogenetics*. 2013 Sep;65(9):655-65.  
1541 <https://doi.org/10.1007/s00251-013-0714-9>  
1542 PMID:23775223 PMCID:PMC3750724  
1543  
1544 69. Ishimoto H, Mukae H, Date Y, Shimbara T, Mondal MS, Ashitani J, Hiratsuka T, Kubo S,  
1545 Kohno S, Nakazato M. Identification of hBD-3 in respiratory tract and serum: the increase in  
1546 pneumonia. *European Respiratory Journal*. 2006 Feb 1;27(2):253-60.  
1547 <https://doi.org/10.1183/09031936.06.00105904>  
1548 PMID:16452577  
1549  
1550 70. Judge CJ, Reyes-Aviles E, Conry SJ, Sieg SS, Feng Z, Weinberg A, Anthony DD. HBD-3  
1551 induces NK cell activation, IFN- $\gamma$  secretion and mDC dependent cytolytic function. *Cellular*  
1552 *immunology*. 2015 Oct 1;297(2):61-8.  
1553 <https://doi.org/10.1016/j.cellimm.2015.06.004>  
1554 PMID:26302933 PMCID:PMC4682877  
1555

- 1556 71. Leikina E, Delanoe-Ayari H, Melikov K, Cho MS, Chen A, Waring AJ, Wang W, Xie Y,  
1557 Loo JA, Lehrer RI, Chernomordik LV. Carbohydrate-binding molecules inhibit viral fusion  
1558 and entry by crosslinking membrane glycoproteins. *Nature immunology*. 2005 Oct;6(10):995-  
1559 1001.  
1560 <https://doi.org/10.1038/ni1248>  
1561 PMID:16155572  
1562
- 1563 72. Arai, R., Ueda, H., Kitayama, A., Kamiya, N. and Nagamune, T., 2001. Design of the  
1564 linkers which effectively separate domains of a bifunctional fusion protein. *Protein*  
1565 *engineering*, 14(8), pp.529-532.  
1566 <https://doi.org/10.1093/protein/14.8.529>  
1567 PMID:11579220  
1568
- 1569 73. Tahir Ul Qamar, M., Shokat, Z., Muneer, I., Ashfaq, U. A., Javed, H., Anwar, F., Bari, A.,  
1570 Zahid, B., & Saari, N. (2020). Multiepitope-Based Subunit Vaccine Design and Evaluation  
1571 against Respiratory Syncytial Virus Using Reverse Vaccinology Approach. *Vaccines*, 8(2),  
1572 288.  
1573 <https://doi.org/10.3390/vaccines8020288>  
1574 PMID:32521680 PMCID:PMC7350008  
1575
- 1576 74. Syeda Tahira Qousain Naqvi, Mamoona Yasmeen, Mehreen Ismail, Syed Aun Muhammad,  
1577 Syed Nawazish-i-Husain, Amjad Ali, Fahad Munir, QiYu Zhang, "Designing of Potential  
1578 Polyvalent Vaccine Model for Respiratory Syncytial Virus by System Level  
1579 Immunoinformatics Approaches", *BioMed Research International*, vol. 2021, Article ID  
1580 9940010, 18 pages, 2021.  
1581 <https://doi.org/10.1155/2021/9940010>  
1582 PMID:34136576 PMCID:PMC8177976  
1583
- 1584 75. Gu, Y., Sun, X., Li, B., Huang, J., Zhan, B. and Zhu, X., 2017. Vaccination with a  
1585 paramyosin-based multi-epitope vaccine elicits significant protective immunity against  
1586 *Trichinella spiralis* infection in mice. *Frontiers in microbiology*, 8, p.1475.  
1587 <https://doi.org/10.3389/fmicb.2017.01475>  
1588 PMID:28824599 PMCID:PMC5540943  
1589
- 1590 76. Magnan, C.N., Randall, A. and Baldi, P., 2009. SOLpro: accurate sequence-based  
1591 prediction of protein solubility. *Bioinformatics*, 25(17), pp.2200-2207.  
1592 <https://doi.org/10.1093/bioinformatics/btp386>  
1593 PMID:19549632  
1594
- 1595 77. Saha S, Raghava GP. AlgPred: prediction of allergenic proteins and mapping of IgE  
1596 epitopes. *Nucleic acids research*. 2006 Jul 1;34(suppl\_2):W202-9.  
1597 <https://doi.org/10.1093/nar/gkl343>  
1598 PMID:16844994 PMCID:PMC1538830  
1599
- 1600 78. Ullah A, Sarkar B, Islam SS. Exploiting the reverse vaccinology approach to design novel  
1601 subunit vaccine against ebola virus. *Immunobiology*. 2020a May 1:151949.

1602 <https://doi.org/10.1101/2020.01.02.20016311>

1603

1604

1605 79. Hebditch, M., Carballo-Amador, M.A., Charonis, S., Curtis, R. and Warwicker, J., 2017.  
1606 Protein-Sol: a web tool for predicting protein solubility from sequence. *Bioinformatics*, 33(19),  
1607 pp.3098-3100.

1608 <https://doi.org/10.1093/bioinformatics/btx345>

1609 PMID:28575391 PMCID:PMC5870856

1610

1611 80. Buchan DW, Jones DT. The PSIPRED protein analysis workbench: 20 years on. *Nucleic*  
1612 *acids research*. 2019 Jul 2;47(W1):W402-7.

1613 <https://doi.org/10.1093/nar/gkz297>

1614 PMID:31251384 PMCID:PMC6602445

1615

1616 81. Jones DT. Protein secondary structure prediction based on position-specific scoring  
1617 matrices. *Journal of molecular biology*. 1999 Sep 17;292(2):195-202.

1618 <https://doi.org/10.1006/jmbi.1999.3091>

1619 PMID:10493868

1620

1621 82. Garnier J, Gibrat JF, Robson B. [32] GOR method for predicting protein secondary  
1622 structure from amino acid sequence. In *Methods in enzymology* 1996 Jan 1 (Vol. 266, pp. 540-  
1623 553). Academic Press.

1624 [https://doi.org/10.1016/S0076-6879\(96\)66034-0](https://doi.org/10.1016/S0076-6879(96)66034-0)

1625

1626

1627 83. Geourjon C, Deleage G. SOPMA: significant improvements in protein secondary structure  
1628 prediction by consensus prediction from multiple alignments. *Bioinformatics*. 1995 Dec  
1629 1;11(6):681-4.

1630 <https://doi.org/10.1093/bioinformatics/11.6.681>

1631 PMID:8808585

1632

1633 84. Levin JM, Robson B, Garnier J. An algorithm for secondary structure determination in  
1634 proteins based on sequence similarity. *FEBS letters*. 1986 Sep 15;205(2):303-8

1635 [https://doi.org/10.1016/0014-5793\(86\)80917-6](https://doi.org/10.1016/0014-5793(86)80917-6)

1636

1637

1638 85. Källberg, M., Wang, H., Wang, S., Peng, J., Wang, Z., Lu, H., Xu, J., 2012. Template-  
1639 based protein structure modeling using the RaptorX web server. *Nat. protoc.* 7, 1511.

1640 <https://doi.org/10.1038/nprot.2012.085>

1641 PMID:22814390 PMCID:PMC4730388

1642

1643 86. Wang S, Li W, Zhang R, Liu S, Xu J. CoinFold: a web server for protein contact prediction  
1644 and contact-assisted protein folding. *Nucleic acids research*. 2016 Apr 25;44(W1):W361-6.

1645 <https://doi.org/10.1093/nar/gkw307>

1646 PMID:27112569 PMCID:PMC4987891

1647

- 1648 87. Nugent, T., Cozzetto, D. and Jones, D.T., 2014. Evaluation of predictions in the CASP10  
1649 model refinement category. *Proteins: Structure, Function, and Bioinformatics*, 82, pp.98-111.  
1650 <https://doi.org/10.1002/prot.24377>  
1651 PMID:23900810 PMCID:PMC4282348  
1652
- 1653 88. Ko, J., Park, H., Heo, L. and Seok, C., 2012. GalaxyWEB server for protein structure  
1654 prediction and refinement. *Nucleic acids research*, 40(W1), pp.W294-W297.  
1655 <https://doi.org/10.1093/nar/gks493>  
1656 PMID:22649060 PMCID:PMC3394311  
1657
- 1658 89. Laskowski, R.A., MacArthur, M.W. and Thornton, J.M., 2006. PROCHECK: validation of  
1659 protein-structure coordinates.  
1660
- 1661 90. Morris, A.L., MacArthur, M.W., Hutchinson, E.G. and Thornton, J.M., 1992.  
1662 Stereochemical quality of protein structure coordinates. *Proteins: Structure, Function, and*  
1663 *Bioinformatics*, 12(4), pp.345-364.  
1664 <https://doi.org/10.1002/prot.340120407>  
1665 PMID:1579569  
1666
- 1667 91. Wiederstein, M. and Sippl, M.J., 2007. ProSA-web: interactive web service for the  
1668 recognition of errors in three-dimensional structures of proteins. *Nucleic acids research*,  
1669 35(suppl\_2), pp.W407-W410.  
1670 <https://doi.org/10.1093/nar/gkm290>  
1671 PMID:17517781 PMCID:PMC1933241  
1672
- 1673 92. Craig, D.B. and Dombkowski, A.A., 2013. Disulfide by Design 2.0: a web-based tool for  
1674 disulfide engineering in proteins. *BMC bioinformatics*, 14(1), p.346.  
1675 <https://doi.org/10.1186/1471-2105-14-346>  
1676 PMID:24289175 PMCID:PMC3898251  
1677
- 1678 93. Dombkowski AA. Disulfide by Design™: a computational method for the rational design  
1679 of disulfide bonds in proteins. *Bioinformatics*. 2003 Sep 22;19(14):1852-3.  
1680 <https://doi.org/10.1093/bioinformatics/btg231>  
1681 PMID:14512360  
1682
- 1683 94. Dombkowski AA, Crippen GM. Disulfide recognition in an optimized threading potential.  
1684 *Protein engineering*. 2000 Oct 1;13(10):679-89.  
1685 <https://doi.org/10.1093/protein/13.10.679>  
1686 PMID:11112506  
1687
- 1688 95. Dombkowski AA, Sultana KZ, Craig DB. Protein disulfide engineering. *FEBS letters*. 2014  
1689 Jan 21;588(2):206-12.  
1690 <https://doi.org/10.1016/j.febslet.2013.11.024>  
1691 PMID:24291258  
1692

- 1693 96. Petersen, M.T.N., Jonson, P.H., Petersen, S.B., 1999. Amino acid neighbours and detailed  
1694 conformational analysis of cysteines in proteins. *Protein Eng.* 12, 535-548.  
1695 <https://doi.org/10.1093/protein/12.7.535>  
1696 PMID:10436079  
1697
- 1698 97. Cai CZ, Han LY, Ji ZL, Chen X, Chen YZ. SVM-Prot: web-based support vector machine  
1699 software for functional classification of a protein from its primary sequence. *Nucleic acids*  
1700 *research.* 2003 Jul 1;31(13):3692-7.  
1701 <https://doi.org/10.1093/nar/gkg600>  
1702 PMID:12824396 PMCID:PMC169006  
1703
- 1704 98. Steentoft C, Vakhrushev SY, Joshi HJ, Kong Y, Vester-Christensen MB, Schjoldager KT,  
1705 Lavrsen K, Dabelsteen S, Pedersen NB, Marcos-Silva L, Gupta R. Precision mapping of the  
1706 human O-GalNAc glycoproteome through SimpleCell technology. *The EMBO journal.* 2013  
1707 May 15;32(10):1478-88.  
1708 <https://doi.org/10.1038/emboj.2013.79>  
1709 PMID:23584533 PMCID:PMC3655468  
1710
- 1711 99. Stern, L.J., Calvo-Calle, J.M., 2009. HLA-DR: molecular insights and vaccine design. *Curr.*  
1712 *Pharm. Des.* 15, 3249-3261.  
1713 <https://doi.org/10.2174/138161209789105171>  
1714 PMID:19860674 PMCID:PMC3615543  
1715
- 1716 100. Pierce BG, Wiehe K, Hwang H, Kim BH, Vreven T, Weng Z. ZDOCK server: interactive  
1717 docking prediction of protein-protein complexes and symmetric multimers. *Bioinformatics.*  
1718 2014 Jun 15;30(12):1771-3.  
1719 <https://doi.org/10.1093/bioinformatics/btu097>  
1720 PMID:24532726 PMCID:PMC4058926  
1721
- 1722 101. Berendsen HJ, van der Spoel D, van Drunen R. GROMACS: a message-passing parallel  
1723 molecular dynamics implementation. *Computer physics communications.* 1995 Sep 2;91(1-  
1724 3):43-56.  
1725 [https://doi.org/10.1016/0010-4655\(95\)00042-E](https://doi.org/10.1016/0010-4655(95)00042-E)  
1726  
1727
- 1728 102. Best RB, Zhu X, Shim J, Lopes PE, Mittal J, Feig M, MacKerell Jr AD. Optimization of  
1729 the additive CHARMM all-atom protein force field targeting improved sampling of the  
1730 backbone  $\phi$ ,  $\psi$  and side-chain  $\chi_1$  and  $\chi_2$  dihedral angles. *Journal of chemical theory and*  
1731 *computation.* 2012 Sep 11;8(9):3257-73.  
1732 <https://doi.org/10.1021/ct300400x>  
1733 PMID:23341755 PMCID:PMC3549273  
1734
- 1735 103. Vanommeslaeghe K, Hatcher E, Acharya C, Kundu S, Zhong S, Shim J, Darian E,  
1736 Guvench O, Lopes P, Vorobyov I, Mackerell Jr AD. CHARMM general force field: A force  
1737 field for drug-like molecules compatible with the CHARMM all-atom additive biological force  
1738 fields. *Journal of computational chemistry.* 2010 Mar;31(4):671-90.

- 1739 <https://doi.org/10.1002/jcc.21367>  
1740 PMID:19575467 PMCID:PMC2888302  
1741
- 1742 104. Zielkiewicz J. Structural properties of water: Comparison of the SPC, SPCE, TIP4P, and  
1743 TIP5P models of water. *The Journal of chemical physics*. 2005 Sep 8;123(10):104501.  
1744 <https://doi.org/10.1063/1.2018637>  
1745 PMID:16178604  
1746
- 1747 105. Bussi G, Donadio D, Parrinello M. Canonical sampling through velocity rescaling. *The*  
1748 *Journal of chemical physics*. 2007 Jan 7;126(1):014101.  
1749 <https://doi.org/10.1063/1.2408420>  
1750 PMID:17212484  
1751
- 1752 106. Berendsen HJ, Postma JV, van Gunsteren WF, DiNola AR, Haak JR. Molecular dynamics  
1753 with coupling to an external bath. *The Journal of chemical physics*. 1984 Oct 15;81(8):3684-  
1754 90.  
1755 <https://doi.org/10.1063/1.448118>  
1756  
1757
- 1758 107. Parrinello M, Rahman A. Polymorphic transitions in single crystals: A new molecular  
1759 dynamics method. *Journal of Applied physics*. 1981 Dec;52(12):7182-90.  
1760 <https://doi.org/10.1063/1.328693>  
1761  
1762
- 1763 108. Hess B, Bekker H, Berendsen HJ, Fraaije JG. LINCS: a linear constraint solver for  
1764 molecular simulations. *Journal of computational chemistry*. 1997 Sep;18(12):1463-72.  
1765 [https://doi.org/10.1002/\(SICI\)1096-987X\(199709\)18:12<1463::AID-JCC4>3.0.CO;2-H](https://doi.org/10.1002/(SICI)1096-987X(199709)18:12<1463::AID-JCC4>3.0.CO;2-H)  
1766  
1767
- 1768 109. Petersen HG. Accuracy and efficiency of the particle mesh Ewald method. *The Journal of*  
1769 *chemical physics*. 1995 Sep 1;103(9):3668-79.  
1770 <https://doi.org/10.1063/1.470043>  
1771  
1772
- 1773 110. Rapin, N., Lund, O., Bernaschi, M. and Castiglione, F., 2010. Computational immunology  
1774 meets bioinformatics: the use of prediction tools for molecular binding in the simulation of the  
1775 immune system. *PLoS One*, 5(4).  
1776 <https://doi.org/10.1371/journal.pone.0009862>  
1777 PMID:20419125 PMCID:PMC2855701  
1778
- 1779 111. Castiglione, F., Mantile, F., De Berardinis, P. and Prisco, A., 2012. How the interval  
1780 between prime and boost injection affects the immune response in a computational model of  
1781 the immune system. *Computational and mathematical methods in medicine*, 2012.  
1782 <https://doi.org/10.1155/2012/842329>  
1783 PMID:22997539 PMCID:PMC3446774  
1784

- 1785 112. Sarkar B, Ullah MA, Araf Y, Das S, Rahman MH, Moin AT. Designing novel epitope-  
1786 based polyvalent vaccines against herpes simplex virus-1 and 2 exploiting the  
1787 immunoinformatics approach. *Journal of Biomolecular Structure and Dynamics*. 2020b Aug  
1788 6:1-21.  
1789 <https://doi.org/10.1080/07391102.2020.1803969>  
1790 PMID:32762514  
1791
- 1792 113. Grote A, Hiller K, Scheer M, Münch R, Nörtemann B, Hempel DC, Jahn D. JCat: a novel  
1793 tool to adapt codon usage of a target gene to its potential expression host. *Nucleic Acids Res*  
1794 2005;33:W526-31.  
1795 <https://doi.org/10.1093/nar/gki376>  
1796 PMID:15980527 PMCID:PMC1160137  
1797
- 1798 114. Chang KY, Yang JR. Analysis and prediction of highly effective antiviral peptides based  
1799 on random forests. *PloS one*. 2013 Aug 5;8(8):e70166.  
1800 <https://doi.org/10.1371/journal.pone.0070166>  
1801 PMID:23940542 PMCID:PMC3734225  
1802
- 1803 115. Choi ES, Lee SG, Lee SJ, Kim E. Rapid detection of 6×-histidine-labeled recombinant  
1804 proteins by immunochromatography using dye-labeled cellulose nanobeads. *Biotechnology*  
1805 *letters*. 2015 Mar;37(3):627-32.  
1806 <https://doi.org/10.1007/s10529-014-1731-y>  
1807 PMID:25388454  
1808
- 1809 116. Solanki, V. and Tiwari, V., 2018. Subtractive proteomics to identify novel drug targets  
1810 and reverse vaccinology for the development of chimeric vaccine against *Acinetobacter*  
1811 *baumannii*. *Scientific reports*, 8(1), pp.1-19.  
1812 <https://doi.org/10.1038/s41598-018-26689-7>  
1813 PMID:29899345 PMCID:PMC5997985  
1814
- 1815 117. Biswal, J.K., Bisht, P., Mohapatra, J.K., Ranjan, R., Sanyal, A. and Pattnaik, B., 2015.  
1816 Application of a recombinant capsid polyprotein (P1) expressed in a prokaryotic system to  
1817 detect antibodies against foot-and-mouth disease virus serotype O. *Journal of virological*  
1818 *methods*, 215, pp.45-51.  
1819 <https://doi.org/10.1016/j.jviromet.2015.02.008>  
1820 PMID:25701759  
1821
- 1822 118. Zuker, M., 2003. Mfold web server for nucleic acid folding and hybridization prediction.  
1823 *Nucleic acids research*, 31(13), pp.3406-3415.  
1824 <https://doi.org/10.1093/nar/gkg595>  
1825 PMID:12824337 PMCID:PMC169194  
1826
- 1827 119. Mathews, D.H., Sabina, J., Zuker, M. and Turner, D.H., 1999. Expanded sequence  
1828 dependence of thermodynamic parameters improves prediction of RNA secondary structure.  
1829 *Journal of molecular biology*, 288(5), pp.911-940.  
1830 <https://doi.org/10.1006/jmbi.1999.2700>



1831 PMid:10329189

1832

1833 120. Mathews, D.H., Turner, D.H. and Zuker, M., 2007. RNA secondary structure prediction.  
1834 Current protocols in nucleic acid chemistry, 28(1), pp.11-2.

1835 <https://doi.org/10.1002/0471142700.nc1102s28>

1836 PMid:18428968 PMCID:PMC5115178

1837

1838 121. Khan MT, Islam R, Jerin TJ, Mahmud A, Khatun S, Kobir A, Islam MN, Akter A, Mondal  
1839 SI. Immunoinformatics and molecular dynamics approaches: Next generation vaccine design  
1840 against West Nile virus. Plos one. 2021 Jun 17;16(6):e0253393.

1841 <https://doi.org/10.1371/journal.pone.0253393>

1842 PMid:34138958 PMCID:PMC8211291

1843

1844 122. Lobanov MYu, Bogatyreva NS, Galzitskaya OV. Radius of gyration as an indicator of  
1845 protein structure compactness. Mol Biol. 2008 Aug;42(4):623-8.

1846 <https://doi.org/10.1134/S0026893308040195>

1847

1848

1849 123. Pettersen EF, Goddard TD, Huang CC, Meng EC, Couch GS, Croll TI, et al. UCSF  
1850 ChimeraX : Structure visualization for researchers, educators, and developers. Protein Science.  
1851 2021 Jan;30(1):70-82.

1852 <https://doi.org/10.1002/pro.3943>

1853 PMid:32881101 PMCID:PMC7737788

1854

1855 124. Ndure J, Flanagan KL. Targeting regulatory T cells to improve vaccine immunogenicity  
1856 in early life. Frontiers in microbiology. 2014 Sep 11;5:477.

1857 <https://doi.org/10.3389/fmicb.2014.00477>

1858 PMid:25309517 PMCID:PMC4161046

1859

1860 125. Carbone A, Zinovyev A, Képes F. Codon adaptation index as a measure of dominating  
1861 codon bias. Bioinformatics 2003;19:2005-15.

1862 <https://doi.org/10.1093/bioinformatics/btg272>

1863 PMid:14594704

1864

1865 126. Gallagher TM, Buchmeier MJ. Coronavirus spike proteins in viral entry and pathogenesis.  
1866 Virology. 2001;279(2):pp.371-374.

1867 <https://doi.org/10.1006/viro.2000.0757>

1868 PMid:11162792 PMCID:PMC7133764

1869

1870 127. Almofti YA, Abd-elrahman KA, Gassmallah SAE, et al. Multi epitopes vaccine prediction  
1871 against severe acute respiratory syndrome (sars) coronavirus using immunoinformatics  
1872 approaches. Am J Microbiol Res. 2018;6(3):pp.94-114.

1873 <https://doi.org/10.12691/ajmr-6-3-5>

1874

1875

- 1876 128. Carvalho LH, Sano GI, Hafalla JC, et al. IL-4-secreting CD4<sup>+</sup> T cells are crucial to the  
1877 development of CD8<sup>+</sup> T-cell responses against malaria liver stages. *Nat Med.*  
1878 2002;8(2):pp.166-170.  
1879 <https://doi.org/10.1038/nm0202-166>  
1880 PMID:11821901  
1881
- 1882 129. Shey RA, Ghogomu SM, Esoh KK, et al. In-silico design of a multi-epitope vaccine  
1883 candidate against onchocerciasis and related filarial diseases. *Sci Rep.* 2019;9(1):pp.1-18.  
1884 <https://doi.org/10.1038/s41598-019-40833-x>  
1885 PMID:30867498 PMCID:PMC6416346  
1886
- 1887 130. Hoque MN, Istiaq A, Clement RA, et al. Metagenomic deep sequencing reveals  
1888 association of microbiome signature with functional biases in bovine mastitis. *Sci Rep.*  
1889 2019;9(1):pp.1-14.  
1890 <https://doi.org/10.1038/s41598-019-49468-4>  
1891 PMID:31537825 PMCID:PMC6753130  
1892
- 1893 131. Kambayashi T, Laufer TM. Atypical MHC class II-expressing antigen-presenting cells:  
1894 can anything replace a dendritic cell? *Nat Rev Immunol.* 2014;14(11):pp.719-730.  
1895 <https://doi.org/10.1038/nri3754>  
1896 PMID:25324123  
1897
- 1898 132. Štěpánová S, Kašička V. Application of Capillary Electromigration Methods for  
1899 Physicochemical Measurements. In *Capillary Electromigration Separation Methods 2018* Jan 1  
1900 (pp. 547-591). Elsevier.  
1901 <https://doi.org/10.1016/B978-0-12-809375-7.00024-1>  
1902  
1903
- 1904 133. Hamasaki-Katagiri N, Lin BC, Simon J, Hunt RC, Schiller T, Russek-Cohen E, Komar  
1905 AA, Bar H, Kimchi-Sarfaty C. The importance of mRNA structure in determining the  
1906 pathogenicity of synonymous and non-synonymous mutations in haemophilia. *Haemophilia.*  
1907 2017 Jan;23(1):e8-17.  
1908 <https://doi.org/10.1111/hae.13107>  
1909 PMID:27933712 PMCID:PMC5226872  
1910
- 1911 134. Ikai, A., 1980. Thermostability and aliphatic index of globular proteins. *The Journal of*  
1912 *Biochemistry*, 88(6), pp.1895-1898.  
1913
- 1914 135. Panda, S. and Chandra, G., 2012. Physicochemical characterization and functional  
1915 analysis of some snake venom toxin proteins and related non-toxin proteins of other chordates.  
1916 *Bioinformation*, 8(18), p.891.  
1917 <https://doi.org/10.6026/97320630008891>  
1918 PMID:23144546 PMCID:PMC3489095  
1919
- 1920 136. Pei H, Liu J, Cheng Y, Sun C, Wang C, Lu Y, Ding J, Zhou J, Xiang H. Expression of  
1921 SARS-coronavirus nucleocapsid protein in *Escherichia coli* and *Lactococcus lactis* for

- 1922 serodiagnosis and mucosal vaccination. *Applied microbiology and biotechnology*. 2005  
1923 Aug;68(2):220-7.  
1924 <https://doi.org/10.1007/s00253-004-1869-y>  
1925 PMID:15660214 PMCID:PMC7079895  
1926
- 1927 137. Morla S, Makhija A, Kumar S. Synonymous codon usage pattern in glycoprotein gene of  
1928 rabies virus. *Gene*. 2016 Jun 10;584(1):1-6.  
1929 <https://doi.org/10.1016/j.gene.2016.02.047>  
1930 PMID:26945626  
1931
- 1932 138. Kyte J, Doolittle RF. A simple method for displaying the hydropathic character of a  
1933 protein. *Journal of molecular biology*. 1982 May 5;157(1):105-32.  
1934 [https://doi.org/10.1016/0022-2836\(82\)90515-0](https://doi.org/10.1016/0022-2836(82)90515-0)  
1935  
1936
- 1937 139. Chang, K.Y. and Yang, J.R., 2013. Analysis and prediction of highly effective antiviral  
1938 peptides based on random forests. *PloS one*, 8(8).  
1939 <https://doi.org/10.1371/journal.pone.0070166>  
1940 PMID:23940542 PMCID:PMC3734225  
1941
- 1942 140. Zhang, L. (2018). Multi-epitope vaccines: A promising strategy against tumors and viral  
1943 infections. *Cellular & Molecular Immunology*, 15(2), 182-184.  
1944 <https://doi.org/10.1038/cmi.2017.92>  
1945 PMID:28890542 PMCID:PMC5811687  
1946
- 1947 141. Bacchetta, R., Gregori, S., & Roncarolo, M. G. (2005). CD4<sup>+</sup> regulatory T cells:  
1948 Mechanisms of induction and effector function. *Autoimmunity Reviews*, 4(8), 491-496.  
1949 <https://doi.org/10.1016/j.autrev.2005.04.005>  
1950 PMID:16214084  
1951
- 1952 142. Cano, R.L.E. and Lopera, H.D.E., 2013. Introduction to T and B lymphocytes. In  
1953 *Autoimmunity: From Bench to Bedside* [Internet]. El Rosario University Press.  
1954
- 1955 143. Raza MT, Mizan S, Yasmin F, Akash AS, Shahik SM. Epitope-based universal vaccine  
1956 for Human T-lymphotropic virus-1 (HTLV-1). *PloS one*. 2021 Apr 2;16(4):e0248001.  
1957 <https://doi.org/10.1371/journal.pone.0248001>  
1958 PMID:33798232 PMCID:PMC8018625  
1959
- 1960 144. Sanchez-Trincado JL, Gomez-Perosanz M, Reche PA. Fundamentals and methods for T-  
1961 and B-cell epitope prediction. *Journal of immunology research*. 2017 Oct;2017.  
1962 <https://doi.org/10.1155/2017/2680160>  
1963 PMID:29445754 PMCID:PMC5763123  
1964
- 1965 145. Shachar I, Karin N. The dual roles of inflammatory cytokines and chemokines in the  
1966 regulation of autoimmune diseases and their clinical implications. *Journal of leukocyte biology*.  
1967 2013 Jan;93(1):51-61.

- 1968 <https://doi.org/10.1189/jlb.0612293>  
1969 PMID:22949334  
1970
- 1971 146. Holdsworth SR, Gan PY. Cytokines: names and numbers you should care about. *Clinical*  
1972 *journal of the American Society of Nephrology*. 2015 Dec 7;10(12):2243-54.  
1973 <https://doi.org/10.2215/CJN.07590714>  
1974 PMID:25941193 PMCID:PMC4670773  
1975
- 1976 147. Cavaillon JM. Pro-versus anti-inflammatory cytokines: myth or reality. *CELLULAR*  
1977 *AND MOLECULAR BIOLOGY-PARIS-WEGMANN-*. 2001 Jun 1;47(4):695-702.  
1978
- 1979 148. Turner MD, Nedjai B, Hurst T, Pennington DJ. Cytokines and chemokines: At the  
1980 crossroads of cell signalling and inflammatory disease. *Biochimica et Biophysica Acta (BBA)-*  
1981 *Molecular Cell Research*. 2014 Nov 1;1843(11):2563-82.  
1982 <https://doi.org/10.1016/j.bbamcr.2014.05.014>  
1983 PMID:24892271  
1984
- 1985 149. CHANG HD, Radbruch A. The pro-and anti-inflammatory potential of interleukin-12.  
1986 *Annals of the New York Academy of Sciences*. 2007 Aug;1109(1):40-6.  
1987 <https://doi.org/10.1196/annals.1398.006>  
1988 PMID:17785289  
1989
- 1990 150. van Schaik SM, Obot N, Enhorning G, Hintz K, Gross K, Hancock GE, Stack AM,  
1991 Welliver RC. Role of interferon gamma in the pathogenesis of primary respiratory syncytial  
1992 virus infection in BALB/c mice. *Journal of medical virology*. 2000 Oct;62(2):257-66.  
1993 [https://doi.org/10.1002/1096-9071\(200010\)62:2<257::AID-JMV19>3.0.CO;2-M](https://doi.org/10.1002/1096-9071(200010)62:2<257::AID-JMV19>3.0.CO;2-M)  
1994  
1995
- 1996 151. Sarkar SN, Sen GC. Novel functions of proteins encoded by viral stress-inducible genes.  
1997 *Pharmacology & therapeutics*. 2004 Sep 1;103(3):245-59.  
1998 <https://doi.org/10.1016/j.pharmthera.2004.07.007>  
1999 PMID:15464592  
2000
- 2001 152. Fuse S, Molloy MJ, Usherwood EJ. Immune responses against persistent viral infections:  
2002 possible avenues for immunotherapeutic interventions. *Critical Reviews™ in Immunology*.  
2003 2008;28(2).  
2004 <https://doi.org/10.1615/CritRevImmunol.v28.i2.40>  
2005 PMID:18540829  
2006
- 2007 153. Junttila IS. Tuning the cytokine responses: an update on interleukin (IL)-4 and IL-13  
2008 receptor complexes. *Frontiers in immunology*. 2018 Jun 7;9:888.  
2009 <https://doi.org/10.3389/fimmu.2018.00888>  
2010 PMID:29930549 PMCID:PMC6001902  
2011
- 2012 154. Abinaya RV, Viswanathan P. Biotechnology-based therapeutics. In *Translational*  
2013 *Biotechnology* 2021 Jan 1 (pp. 27-52). Academic Press.

- 2014 <https://doi.org/10.1016/B978-0-12-821972-0.00019-8>  
2015 PMID:32660413  
2016  
2017 155. Funderburg N, Lederman MM, Feng Z, Drage MG, Jadowsky J, Harding CV, Weinberg  
2018 A, Sieg SF. Human  $\beta$ -defensin-3 activates professional antigen-presenting cells via Toll-like  
2019 receptors 1 and 2. *Proceedings of the National Academy of Sciences*. 2007 Nov  
2020 20;104(47):18631-5.  
2021 <https://doi.org/10.1073/pnas.0702130104>  
2022 PMID:18006661 PMCID:PMC2141828  
2023  
2024 156. Judge CJ, Reyes-Aviles E, Conry SJ, Sieg SS, Feng Z, Weinberg A, Anthony DD. HBD-3  
2025 induces NK cell activation, IFN- $\gamma$  secretion and mDC dependent cytolytic function. *Cellular*  
2026 *immunology*. 2015 Oct 1;297(2):61-8.  
2027 <https://doi.org/10.1016/j.cellimm.2015.06.004>  
2028 PMID:26302933 PMCID:PMC4682877  
2029  
2030 157. Funderburg N, Lederman MM, Feng Z, Drage MG, Jadowsky J, Harding CV, Weinberg  
2031 A, Sieg SF. Human  $\beta$ -defensin-3 activates professional antigen-presenting cells via Toll-like  
2032 receptors 1 and 2. *Proceedings of the National Academy of Sciences*. 2007 Nov  
2033 20;104(47):18631-5.  
2034 <https://doi.org/10.1073/pnas.0702130104>  
2035 PMID:18006661 PMCID:PMC2141828  
2036  
2037 158. Wolk K, Kunz S, Witte E, Friedrich M, Asadullah K, Sabat R. IL-22 increases the innate  
2038 immunity of tissues. *Immunity*. 2004 Aug 1;21(2):241-54.  
2039 <https://doi.org/10.1016/j.immuni.2004.07.007>  
2040 PMID:15308104  
2041  
2042 159. Sørensen OE, Cowland JB, Theilgaard-Mönch K, Liu L, Ganz T, Borregaard N. Wound  
2043 healing and expression of antimicrobial peptides/polypeptides in human keratinocytes, a  
2044 consequence of common growth factors. *The Journal of Immunology*. 2003 Jun  
2045 1;170(11):5583-9.  
2046 <https://doi.org/10.4049/jimmunol.170.11.5583>  
2047 PMID:12759437  
2048  
2049 160. Ferris LK, Mburu YK, Mathers AR, Fluharty ER, Larregina AT, Ferris RL, Falo Jr LD.  
2050 Human beta-defensin 3 induces maturation of human Langerhans cell-like dendritic cells: an  
2051 antimicrobial peptide that functions as an endogenous adjuvant. *Journal of Investigative*  
2052 *Dermatology*. 2013 Feb 1;133(2):460-8.  
2053 <https://doi.org/10.1038/jid.2012.319>  
2054 PMID:22951718 PMCID:PMC3521079  
2055  
2056 161. Joly S, Organ CC, Johnson GK, McCray Jr PB, Guthmiller JM. Correlation between  $\beta$ -  
2057 defensin expression and induction profiles in gingival keratinocytes. *Molecular immunology*.  
2058 2005 May 1;42(9):1073-84.  
2059 <https://doi.org/10.1016/j.molimm.2004.11.001>

2060 PMid:15829297

2061

2062 162. Judge CJ, Reyes-Aviles E, Conry SJ, Sieg SS, Feng Z, Weinberg A, Anthony DD. HBD-3  
2063 induces NK cell activation, IFN- $\gamma$  secretion and mDC dependent cytolytic function. Cellular  
2064 immunology. 2015 Oct 1;297(2):61-8.

2065 <https://doi.org/10.1016/j.cellimm.2015.06.004>

2066 PMid:26302933 PMCID:PMC4682877

2067

2068 163. Röhr J, Yang D, Oppenheim JJ, Hehlhans T. Human  $\beta$ -defensin 2 and 3 and their mouse  
2069 orthologs induce chemotaxis through interaction with CCR2. The Journal of Immunology.  
2070 2010 Jun 15;184(12):6688-94.

2071 <https://doi.org/10.4049/jimmunol.0903984>

2072 PMid:20483750 PMCID:PMC6309988

2073

2074 164. Shental-Bechor D, Levy Y. Effect of glycosylation on protein folding: a close look at  
2075 thermodynamic stabilization. Proceedings of the National Academy of Sciences. 2008 Jun  
2076 17;105(24):8256-61.

2077 <https://doi.org/10.1073/pnas.0801340105>

2078 PMid:18550810 PMCID:PMC2448824

2079

2080 165. Ojha R, Prajapati VK. Cognizance of posttranslational modifications in vaccines: A way  
2081 to enhanced immunogenicity. Journal of Cellular Physiology. 2021 Jun 25.

2082 <https://doi.org/10.1002/jcp.30483>

2083 PMid:34170014 PMCID:PMC8427110

2084

2085 166. Zarling AL, Ficarro SB, White FM, Shabanowitz J, Hunt DF, Engelhard VH.  
2086 Phosphorylated peptides are naturally processed and presented by major histocompatibility  
2087 complex class I molecules in vivo. The Journal of experimental medicine. 2000 Dec  
2088 18;192(12):1755-62.

2089 <https://doi.org/10.1084/jem.192.12.1755>

2090 PMid:11120772 PMCID:PMC2213507

2091

2092 167. Kawai T, Akira S. TLR signaling. In Seminars in immunology 2007 Feb 1 (Vol. 19, No.  
2093 1, pp. 24-32). Academic Press.

2094 <https://doi.org/10.1016/j.smim.2006.12.004>

2095 PMid:17275323

2096

2097 168. Murawski MR, Bowen GN, Cerny AM, Anderson LJ, Haynes LM, Tripp RA, Kurt-Jones  
2098 EA, Finberg RW. Respiratory syncytial virus activates innate immunity through Toll-like  
2099 receptor 2. Journal of virology. 2009 Feb 1;83(3):1492-500.

2100 <https://doi.org/10.1128/JVI.00671-08>

2101 PMid:19019963 PMCID:PMC2620898

2102

2103 169. Akira S, Uematsu S, Takeuchi O. Pathogen recognition and innate immunity. Cell. 2006  
2104 Feb 24;124(4):783-801.

2105 <https://doi.org/10.1016/j.cell.2006.02.015>

2106 PMid:16497588

2107

2108 170. Cyr SL, Jones T, Stoica-Popescu I, Burt D, Ward BJ. C57Bl/6 mice are protected from  
2109 respiratory syncytial virus (RSV) challenge and IL-5 associated pulmonary eosinophilic  
2110 infiltrates following intranasal immunization with Protollin-eRSV vaccine. *Vaccine*. 2007 Apr  
2111 20;25(16):3228-32.

2112 <https://doi.org/10.1016/j.vaccine.2007.01.037>

2113 PMid:17374422

2114

2115 171. Hancock GE, Heers KM, Pryharski KS, Smith JD, Tiberio L. Adjuvants recognized by  
2116 toll-like receptors inhibit the induction of polarized type 2 T cell responses by natural  
2117 attachment (G) protein of respiratory syncytial virus. *Vaccine*. 2003 Oct 1;21(27-30):4348-58.

2118 [https://doi.org/10.1016/S0264-410X\(03\)00482-1](https://doi.org/10.1016/S0264-410X(03)00482-1)

2119

2120

2121 172. Janssen R, Pennings J, Hodemaekers H, Buisman A, van Oosten M, de Rond L, Öztürk  
2122 K, Dormans J, Kimman T, Hoebee B. Host transcription profiles upon primary respiratory  
2123 syncytial virus infection. *Journal of virology*. 2007 Jun 1;81(11):5958-67.

2124 <https://doi.org/10.1128/JVI.02220-06>

2125 PMid:17376894 PMCID:PMC1900269

2126

2127 173. Chang S, Dolganiuc A, Szabo G. Toll-like receptors 1 and 6 are involved in  
2128 TLR2-mediated macrophage activation by hepatitis C virus core and NS3 proteins. *Journal of*  
2129 *leukocyte biology*. 2007 Sep;82(3):479-87.

2130 <https://doi.org/10.1189/jlb.0207128>

2131 PMid:17595379

2132

2133 174. Compton T, Kurt-Jones EA, Boehme KW, Belko J, Latz E, Golenbock DT, Finberg RW.  
2134 Human cytomegalovirus activates inflammatory cytokine responses via CD14 and Toll-like  
2135 receptor 2. *Journal of virology*. 2003 Apr 15;77(8):4588-96.

2136 <https://doi.org/10.1128/JVI.77.8.4588-4596.2003>

2137 PMid:12663765 PMCID:PMC152130

2138

2139 175. Kurt-Jones EA, Chan M, Zhou S, Wang J, Reed G, Bronson R, Arnold MM, Knipe DM,  
2140 Finberg RW. Herpes simplex virus 1 interaction with Toll-like receptor 2 contributes to lethal  
2141 encephalitis. *Proceedings of the National Academy of Sciences*. 2004 Feb 3;101(5):1315-20.

2142 <https://doi.org/10.1073/pnas.0308057100>

2143 PMid:14739339 PMCID:PMC337050

2144

2145 176. Zhou S, Kurt-Jones EA, Mandell L, Cerny A, Chan M, Golenbock DT, Finberg RW.  
2146 MyD88 is critical for the development of innate and adaptive immunity during acute  
2147 lymphocytic choriomeningitis virus infection. *European journal of immunology*. 2005  
2148 Mar;35(3):822-30.

2149 <https://doi.org/10.1002/eji.200425730>

2150 PMid:15724245

2151

- 2152 177. Jin B, Sun T, Yu XH, Yang YX, Yeo AE. The effects of TLR activation on T-cell  
2153 development and differentiation. *Clinical and Developmental Immunology*. 2012;2012.  
2154 <https://doi.org/10.1155/2012/836485>  
2155 PMID:22737174 PMCID:PMC3376488  
2156
- 2157 178. Gaddis DE, Michalek SM, Katz J. TLR4 signaling via MyD88 and TRIF differentially  
2158 shape the CD4+ T cell response to *Porphyromonas gingivalis* hemagglutinin B. *The Journal of*  
2159 *Immunology*. 2011 May 15;186(10):5772-83.  
2160 <https://doi.org/10.4049/jimmunol.1003192>  
2161 PMID:21498664 PMCID:PMC3809913  
2162
- 2163 179. Kaisho T, Hoshino K, Iwabe T, Takeuchi O, Yasui T, Akira S. Endotoxin can induce  
2164 MyD88-deficient dendritic cells to support Th2 cell differentiation. *International immunology*.  
2165 2002 Jul 1;14(7):695-700.  
2166 <https://doi.org/10.1093/intimm/xf039>  
2167 PMID:12096028  
2168
- 2169 180. Kurt-Jones EA, Popova L, Kwinn L, Haynes LM, Jones LP, Tripp RA, Walsh EE,  
2170 Freeman MW, Golenbock DT, Anderson LJ, Finberg RW. Pattern recognition receptors TLR4  
2171 and CD14 mediate response to respiratory syncytial virus. *Nature immunology*. 2000  
2172 Nov;1(5):398-401.  
2173 <https://doi.org/10.1038/80833>  
2174 PMID:11062499  
2175
- 2176 181. Tayyari F, Marchant D, Moraes TJ, Duan W, Mastrangelo P, Hegele RG. Identification  
2177 of nucleolin as a cellular receptor for human respiratory syncytial virus. *Nature medicine*. 2011  
2178 Sep;17(9):1132-5.  
2179 <https://doi.org/10.1038/nm.2444>  
2180 PMID:21841784  
2181
- 2182 182. Johnson TR, Rao S, Seder RA, Chen M, Graham BS. TLR9 agonist, but not TLR7/8,  
2183 functions as an adjuvant to diminish FI-RSV vaccine-enhanced disease, while either agonist  
2184 used as therapy during primary RSV infection increases disease severity. *Vaccine*. 2009 May  
2185 18;27(23):3045-52.  
2186 <https://doi.org/10.1016/j.vaccine.2009.03.026>  
2187 PMID:19428918 PMCID:PMC2680782  
2188
- 2189 183. Grassin-Delyle S, Abrial C, Salvator H, Brollo M, Naline E, Devillier P. The role of toll-  
2190 like receptors in the production of cytokines by human lung macrophages. *Journal of innate*  
2191 *immunity*. 2020;12(1):63-73.  
2192 <https://doi.org/10.1159/000494463>  
2193 PMID:30557876 PMCID:PMC6959095  
2194
- 2195 184. Almofti, Y.A., Abd-elrahman, K.A., Gassmallah, S.A.E. and Salih, M.A., 2018. Multi  
2196 Epitopes Vaccine Prediction against Severe Acute Respiratory Syndrome (SARS) Coronavirus



- 2197 Using Immunoinformatics Approaches. *American Journal of Microbiological Research*, 6(3),  
2198 pp.94-114.  
2199 <https://doi.org/10.12691/ajmr-6-3-5>  
2200  
2201
- 2202 185. Carvalho, L.H., Sano, G.I., Hafalla, J.C., Morrot, A., De Lafaille, M.A.C. and Zavala, F.,  
2203 2002. IL-4-secreting CD4+ T cells are crucial to the development of CD8+ T-cell responses  
2204 against malaria liver stages. *Nature medicine*, 8(2), pp.166-170.  
2205 <https://doi.org/10.1038/nm0202-166>  
2206 PMID:11821901  
2207
- 2208 186. Shey, R.A., Ghogomu, S.M., Esoh, K.K., Nebangwa, N.D., Shintouo, C.M., Nongley,  
2209 N.F., Asa, B.F., Ngale, F.N., Vanhamme, L. and Souopgui, J., 2019. In-silico design of a multi-  
2210 epitope vaccine candidate against onchocerciasis and related filarial diseases. *Scientific*  
2211 *reports*, 9(1), pp.1-18.  
2212 <https://doi.org/10.1038/s41598-019-40833-x>  
2213 PMID:30867498 PMCID:PMC6416346  
2214
- 2215 187. Hoque, M.N., Istiaq, A., Clement, R.A., Sultana, M., Crandall, K.A., Siddiki, A.Z. and  
2216 Hossain, M.A., 2019. Metagenomic deep sequencing reveals association of microbiome  
2217 signature with functional biases in bovine mastitis. *Scientific reports*, 9(1), pp.1-14.  
2218 <https://doi.org/10.1038/s41598-019-49468-4>  
2219 PMID:31537825 PMCID:PMC6753130  
2220
- 2221 188. Kambayashi, T. and Laufer, T.M., 2014. Atypical MHC class II-expressing antigen-  
2222 presenting cells: can anything replace a dendritic cell?. *Nature Reviews Immunology*, 14(11),  
2223 pp.719-730.  
2224 <https://doi.org/10.1038/nri3754>  
2225 PMID:25324123  
2226
- 2227 189. Sarkar B, Ullah MA, Johora FT, Taniya MA, Araf Y. Immunoinformatics-guided  
2228 designing of epitope-based subunit vaccine against the SARS Coronavirus-2 (SARS-CoV-2).  
2229 *Immunobiology*. 2020c.  
2230 <https://doi.org/10.1016/j.imbio.2020.151955>  
2231 PMID:32517882 PMCID:PMC7211625  
2232
- 2233 190. Russell MW, Moldoveanu Z, Ogra PL, Mestecky J. Mucosal immunity in COVID-19: a  
2234 neglected but critical aspect of SARS-CoV-2 infection. *Frontiers in Immunology*. 2020 Nov  
2235 30;11:3221.  
2236 <https://doi.org/10.3389/fimmu.2020.611337>  
2237 PMID:33329607 PMCID:PMC7733922  
2238
- 2239 191. Wilczyński J, Lukasik B, Torbicka E, Tranda I, Brzozowska-Binda A. Respiratory  
2240 syncytial virus (RSV) antibodies in different immunoglobulin classes in small children. *Acta*  
2241 *Microbiologica Polonica*. 1994 Jan 1;43(3-4):359-68.  
2242

- 2243 192. Ndure J, Flanagan KL. Targeting regulatory T cells to improve vaccine immunogenicity  
2244 in early life. *Frontiers in microbiology*. 2014 Sep 11;5:477.  
2245 <https://doi.org/10.3389/fmicb.2014.00477>  
2246 PMID:25309517 PMCID:PMC4161046  
2247  
2248 193. Sarkar B, Ullah MA, Araf Y. A systematic and reverse vaccinology approach to design  
2249 novel subunit vaccines against dengue virus type-1 and human Papillomavirus-16. *Informatics*  
2250 *in Medicine Unlocked*. 2020d May 16:100343.  
2251 <https://doi.org/10.1016/j.imu.2020.100343>

bioRxiv preprint doi: <https://doi.org/10.1101/2022.02.02.478791>; this version posted February 2, 2022. The copyright holder for this preprint (which was not certified by peer review) is the author/funder, who has granted bioRxiv a license to display the preprint in perpetuity. It is made available under aCC-BY 4.0 International license.

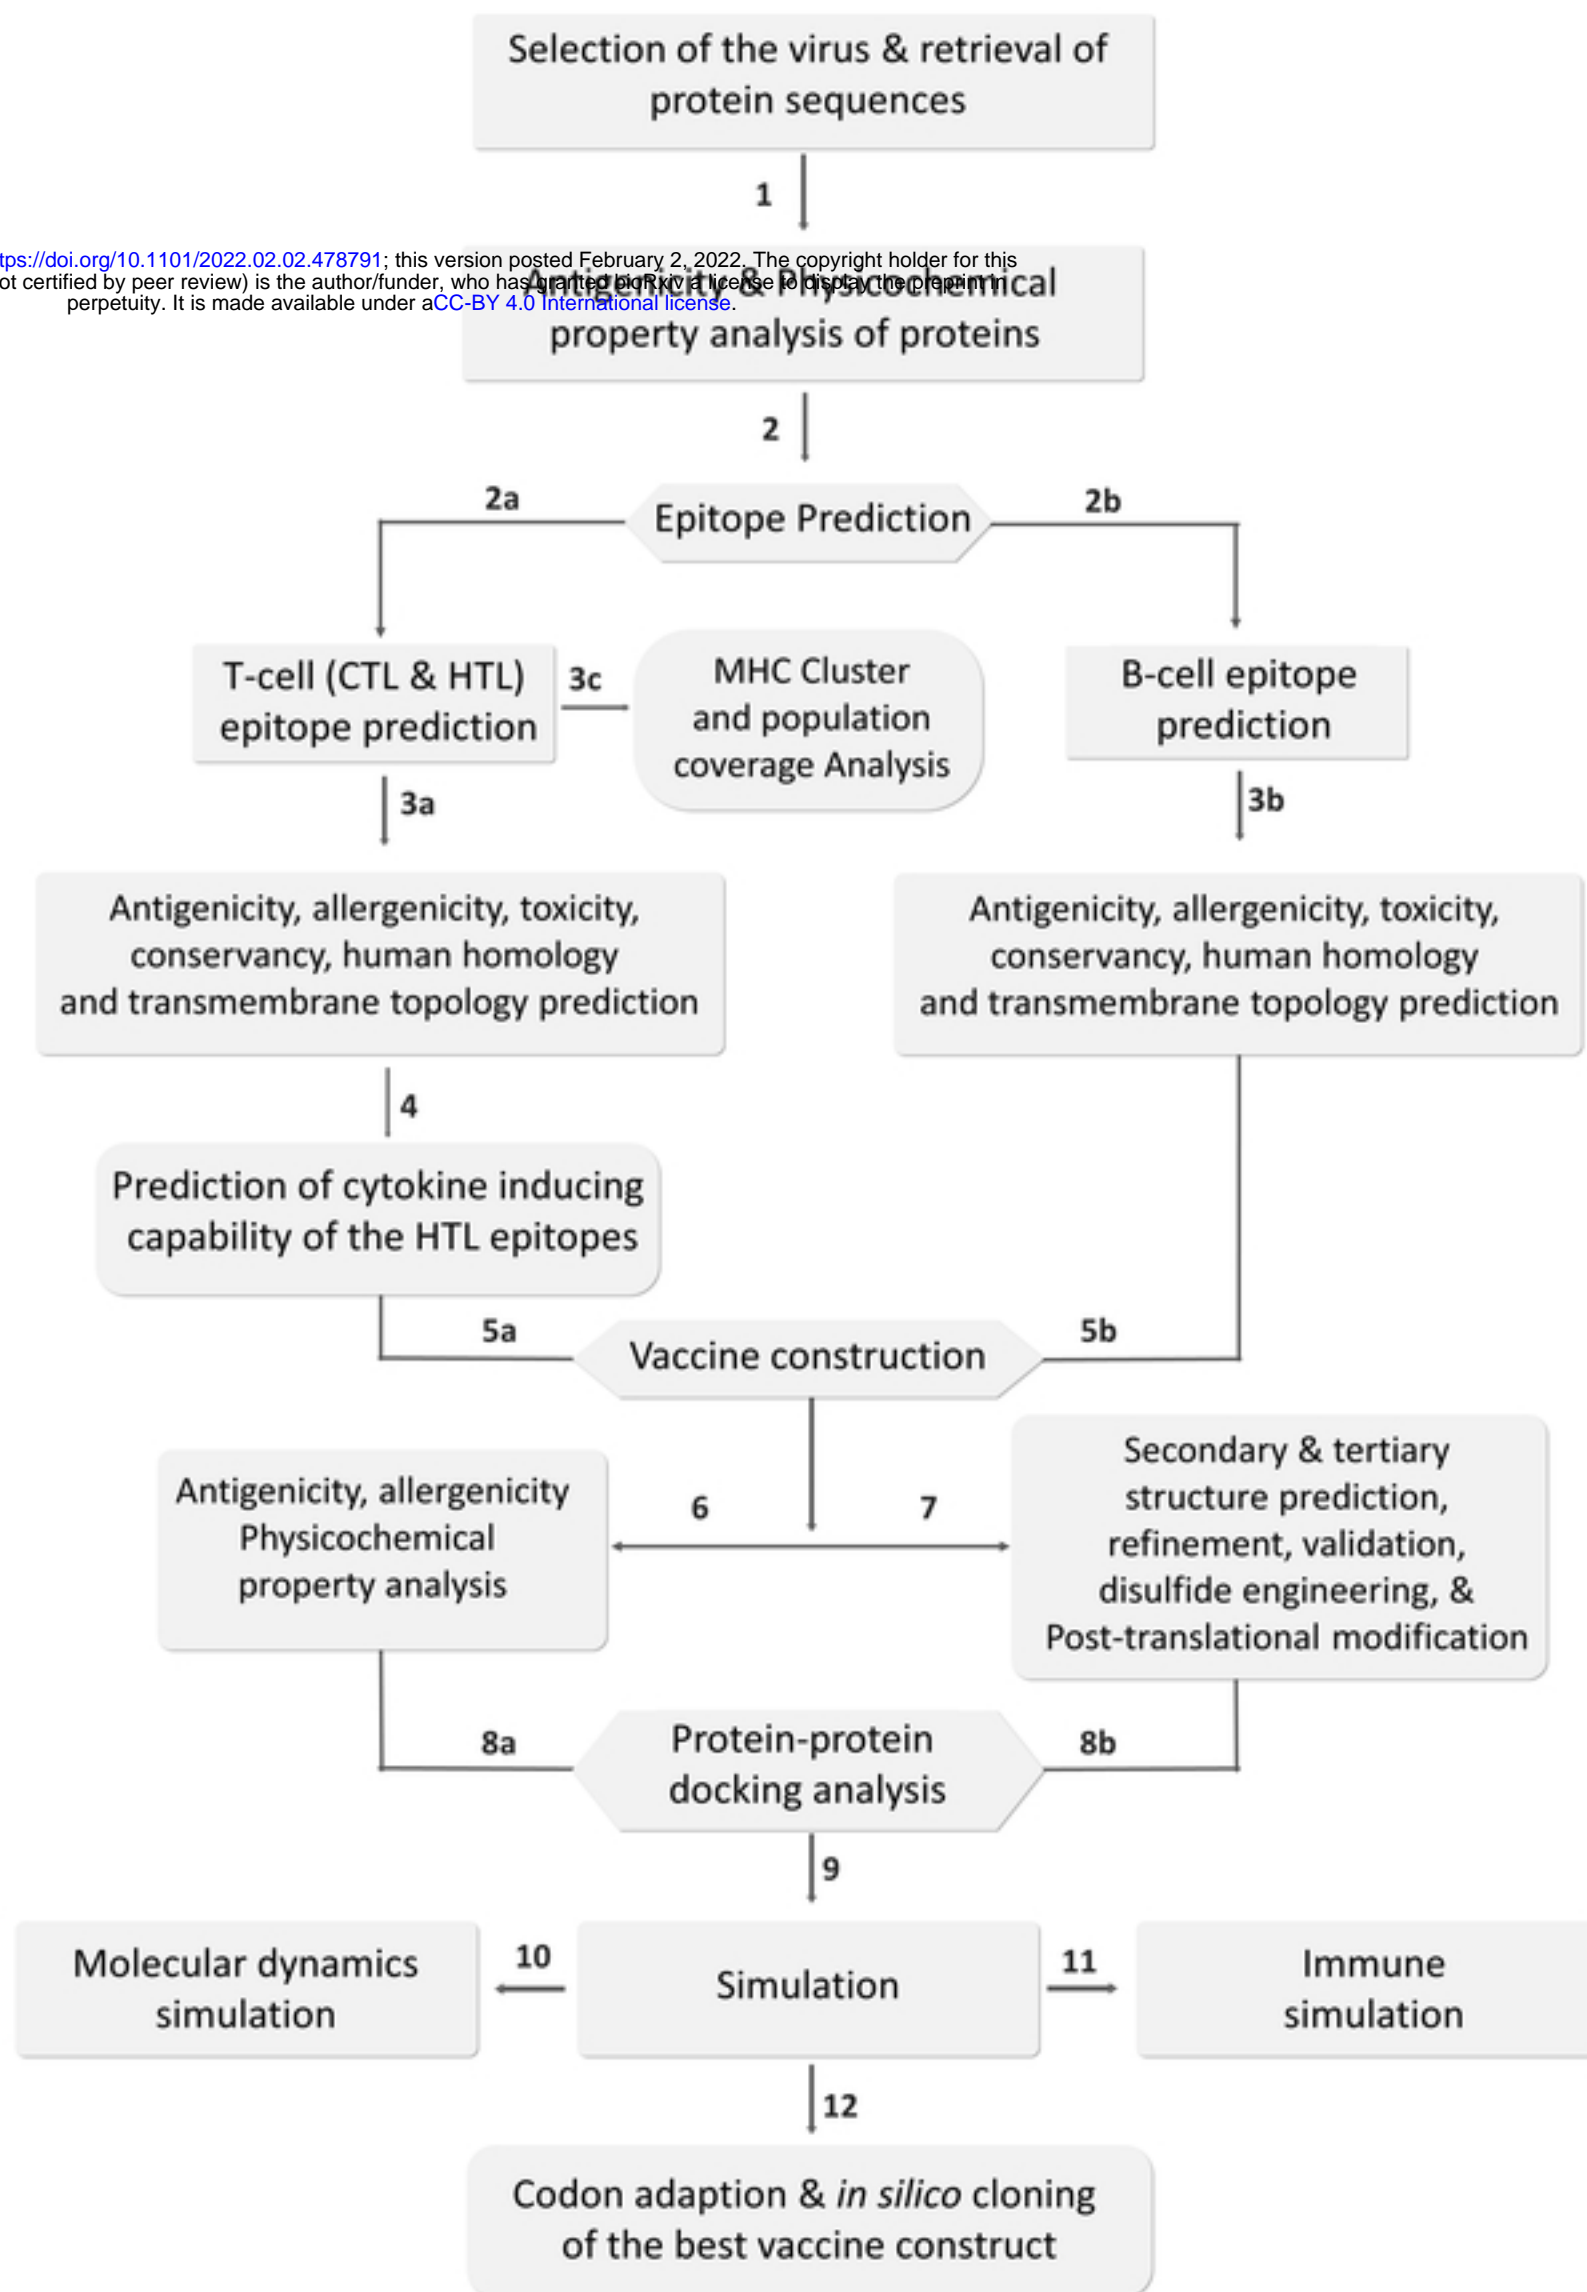

Fig 1

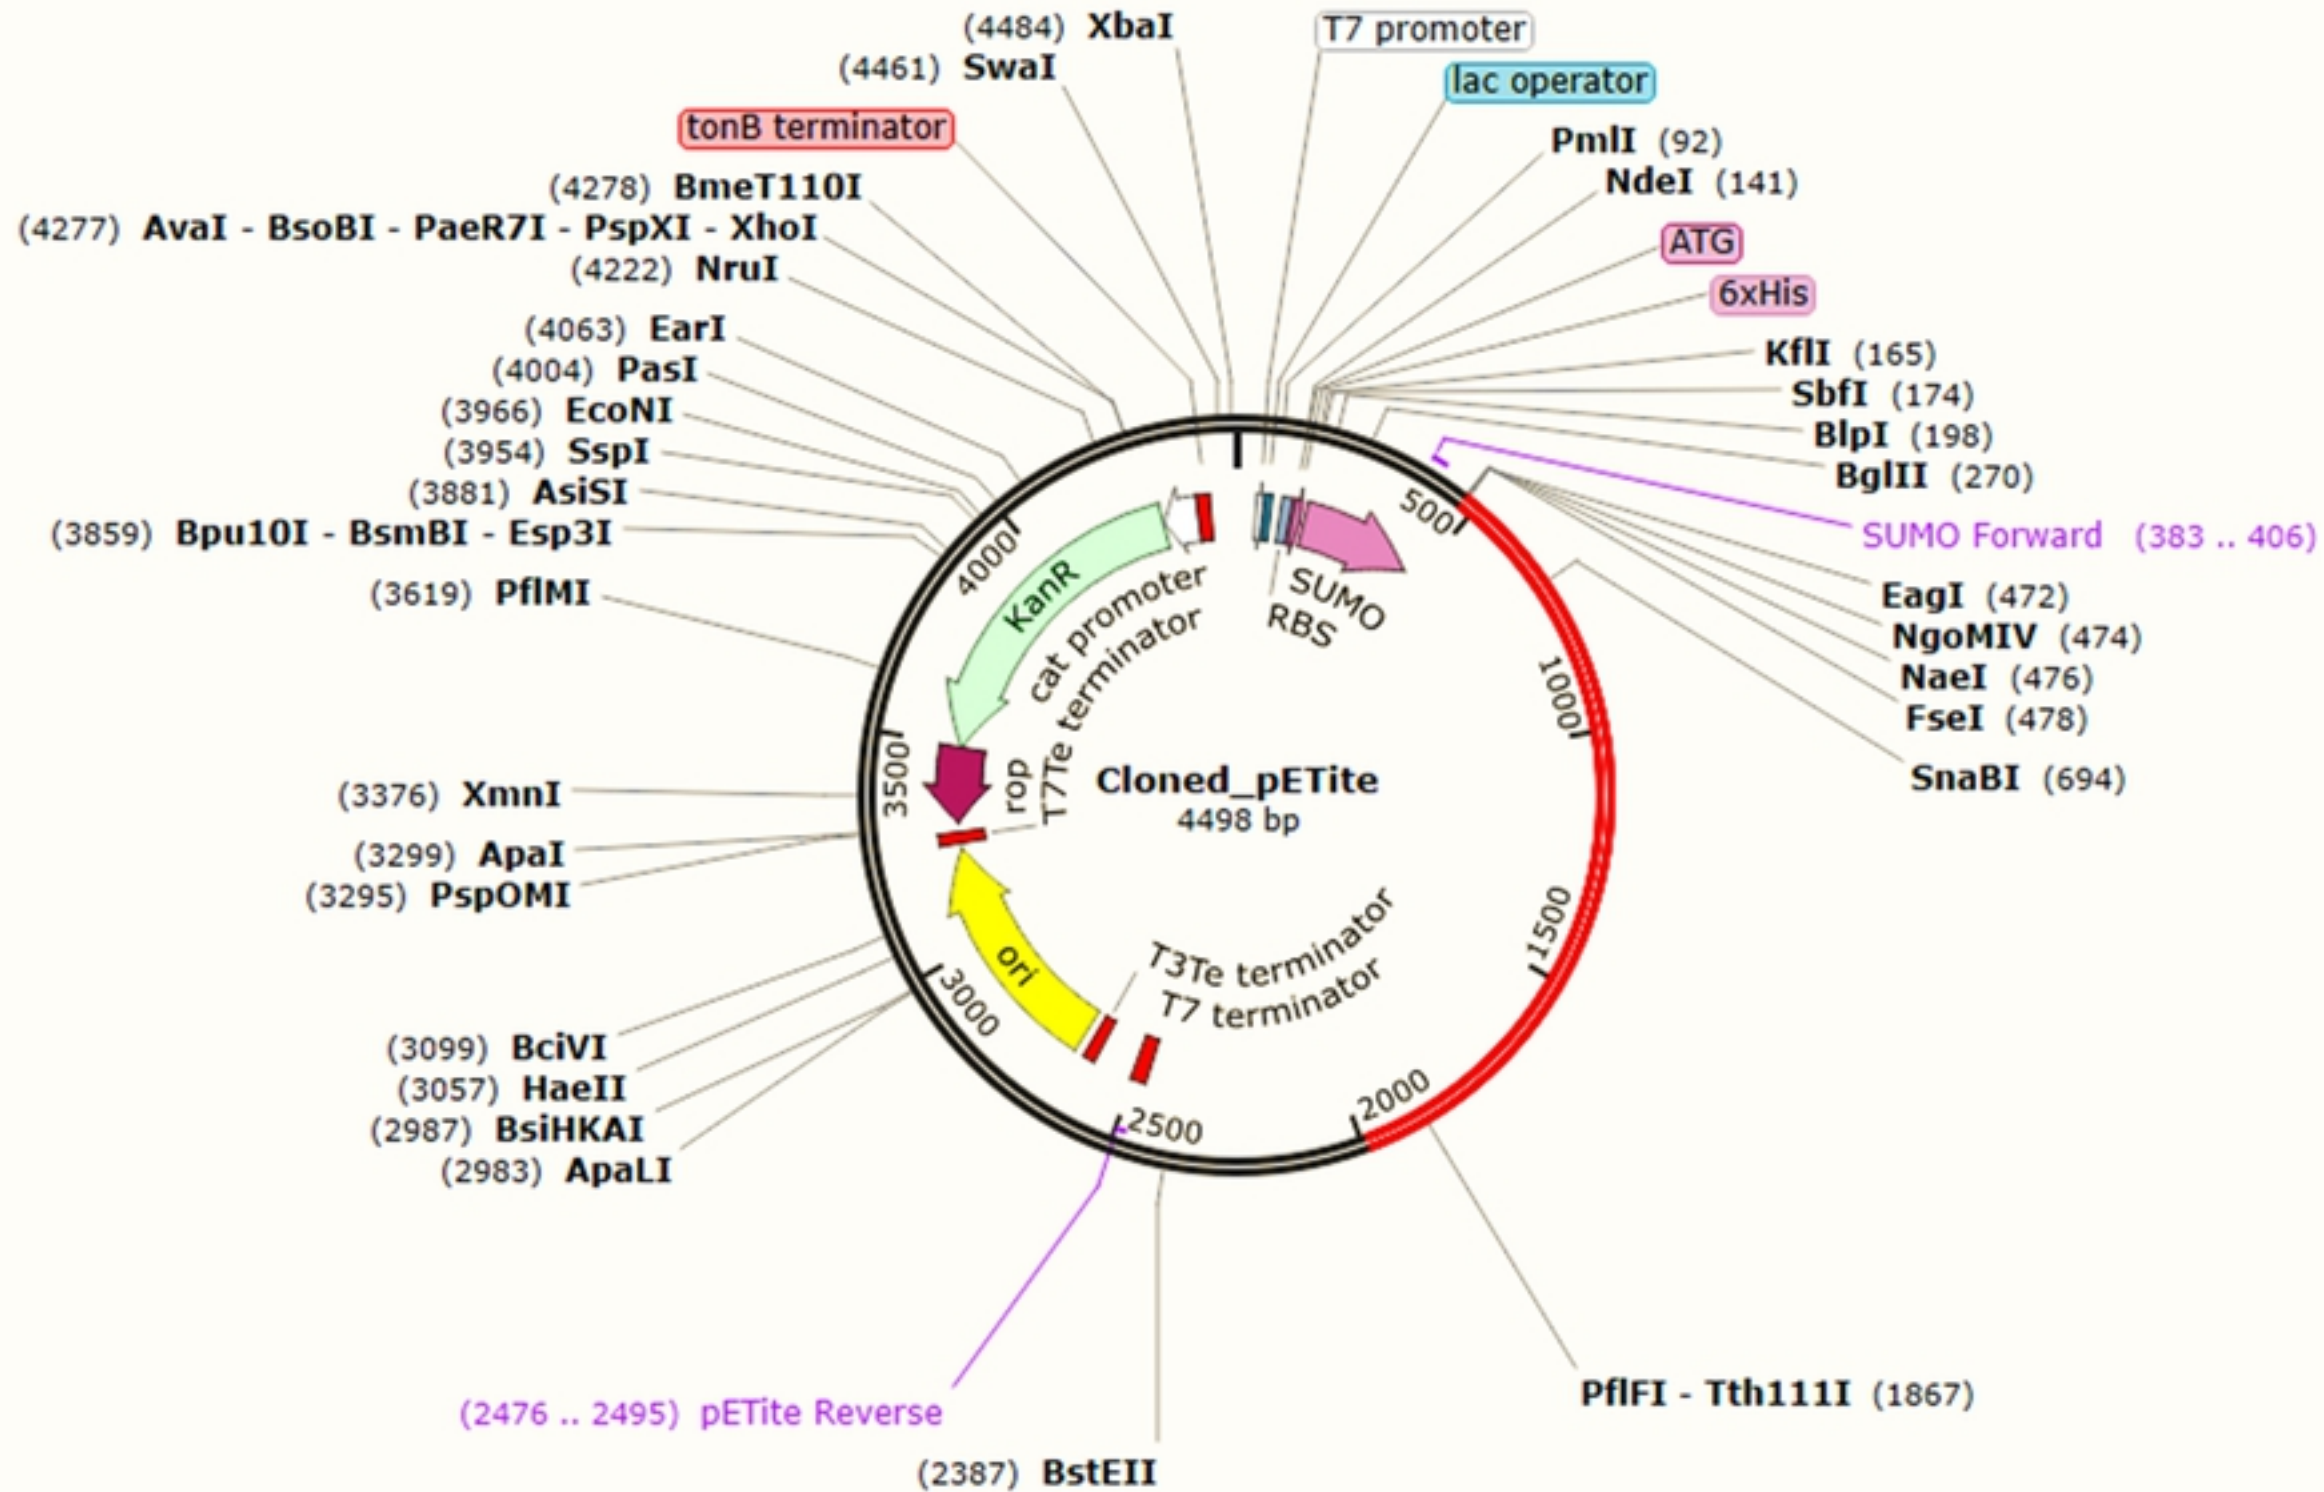

Fig 10

bioRxiv preprint doi: <https://doi.org/10.1101/2022.02.02.478791>; this version posted February 2, 2022. The copyright holder for this preprint (which was not certified by peer review) is the author/funder, who has granted bioRxiv a license to display the preprint in perpetuity. It is made available under aCC-BY 4.0 International license.

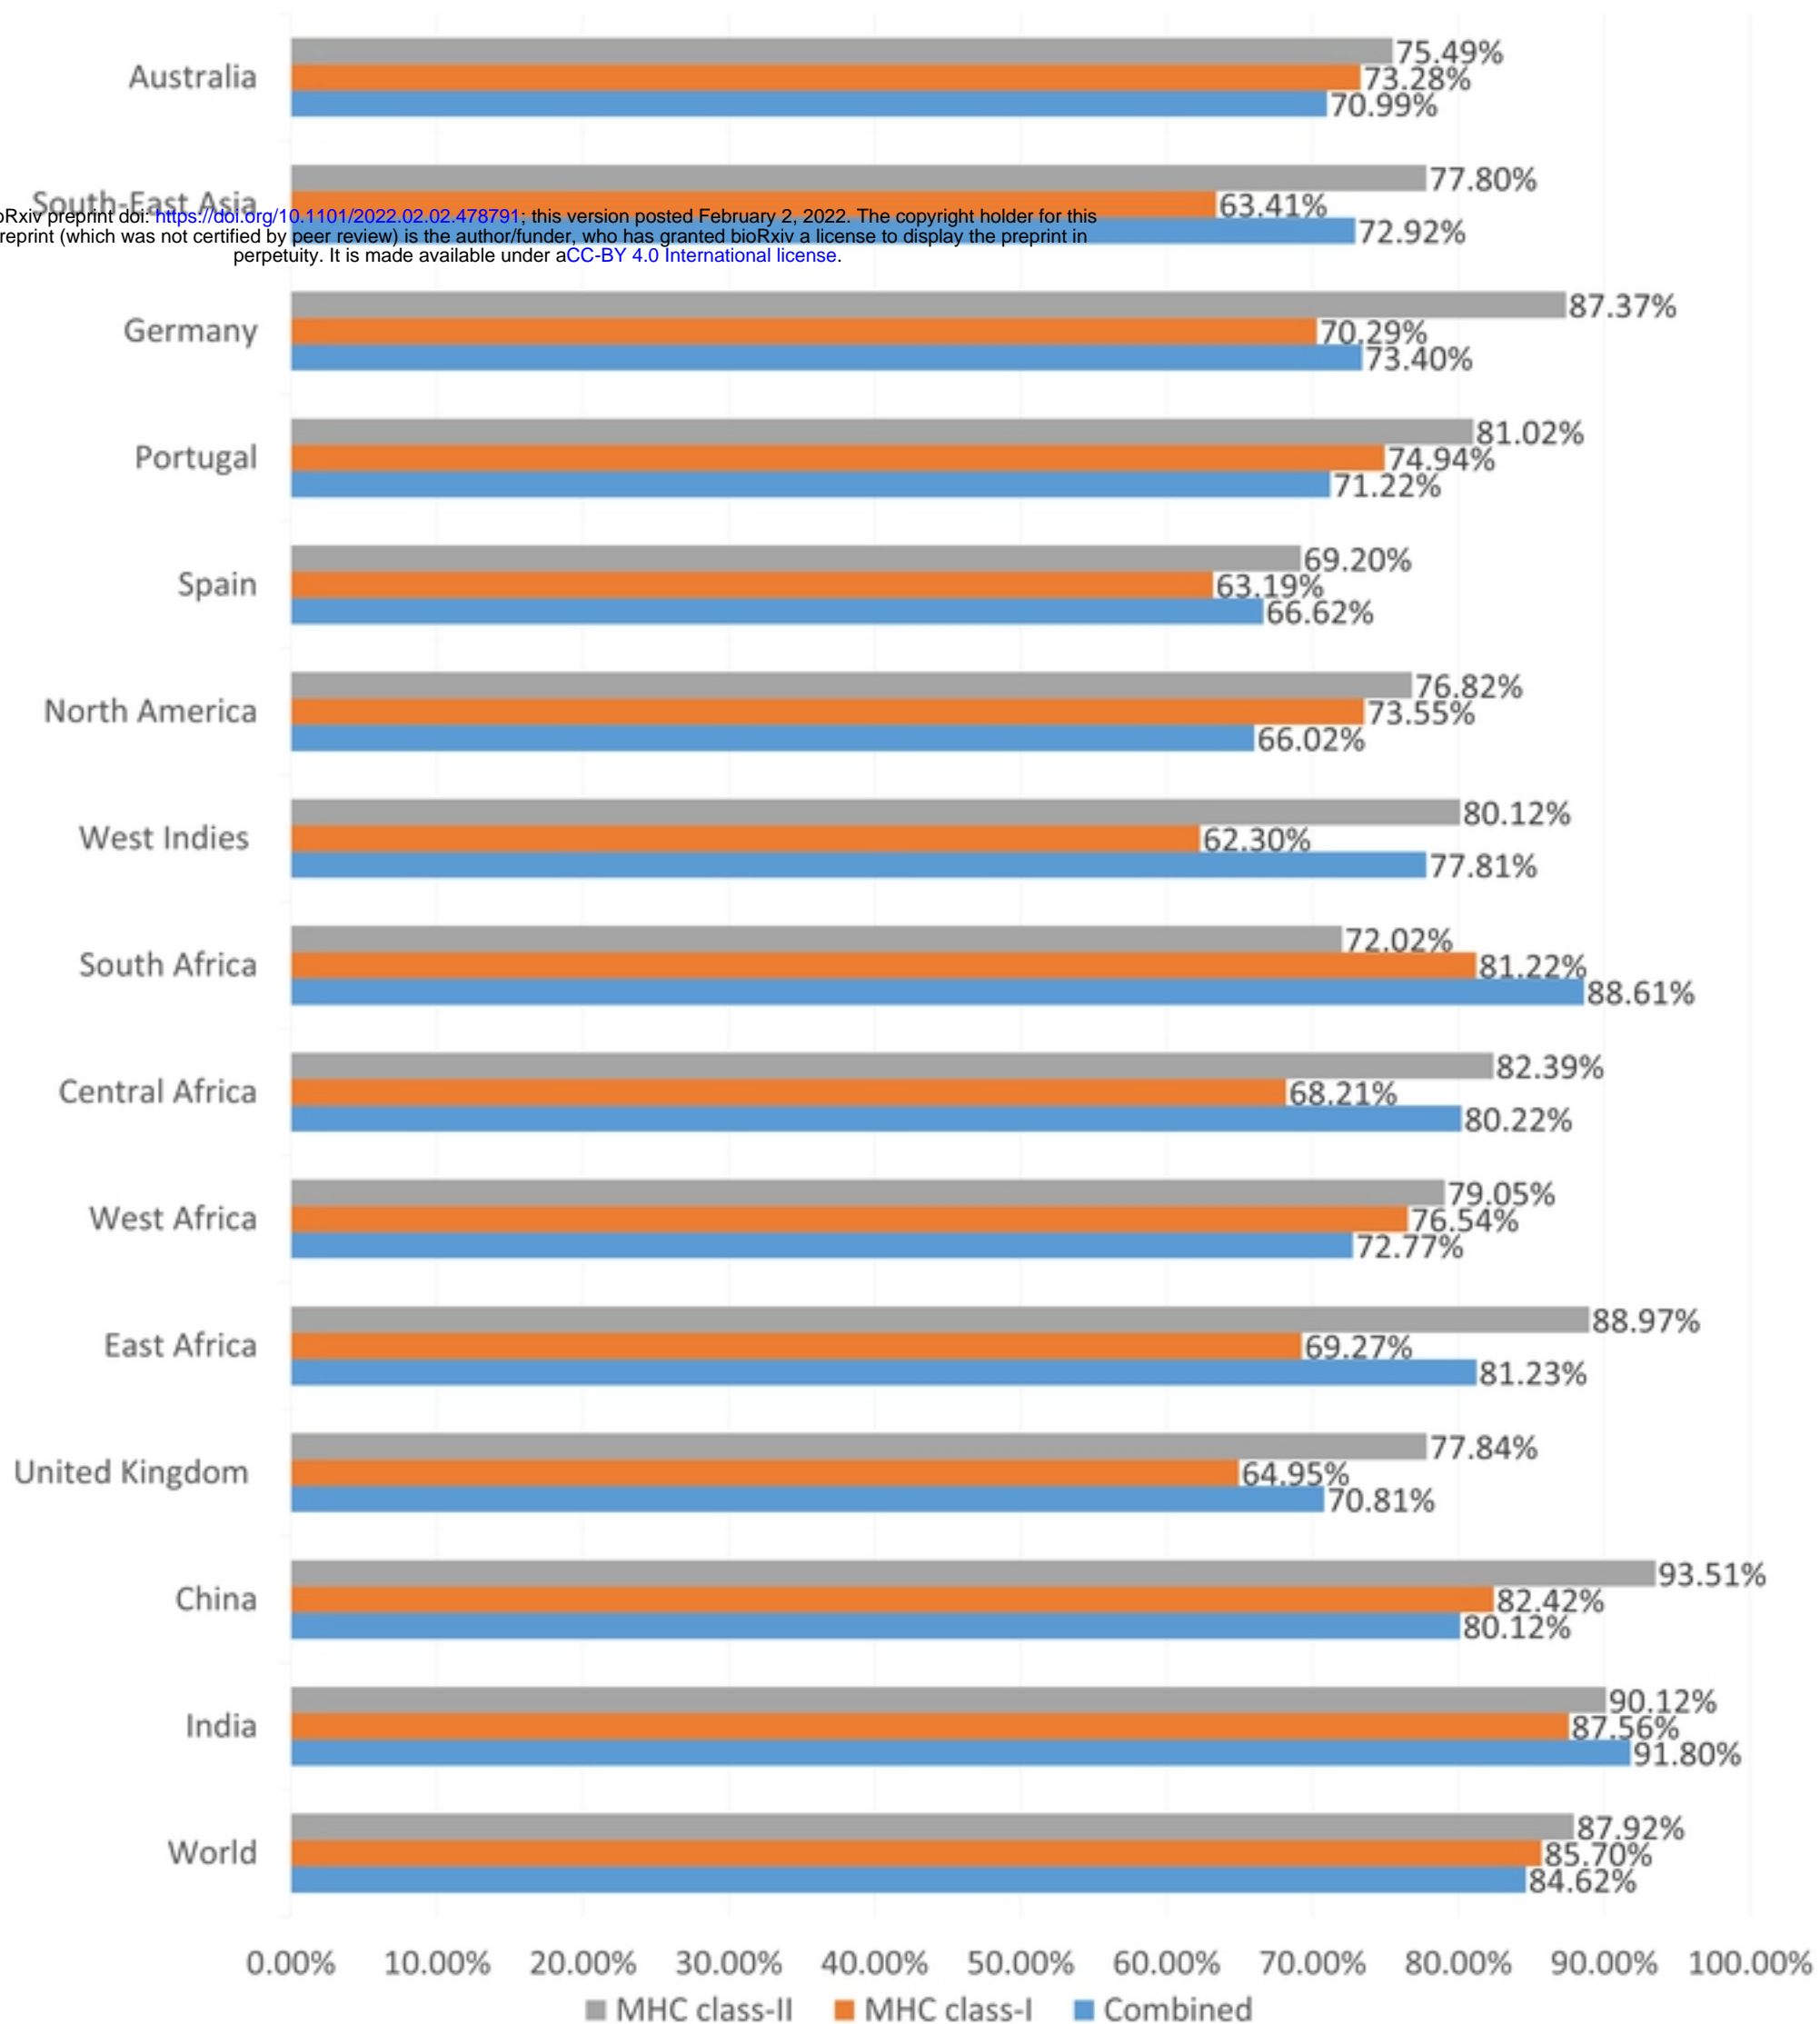

Fig 2

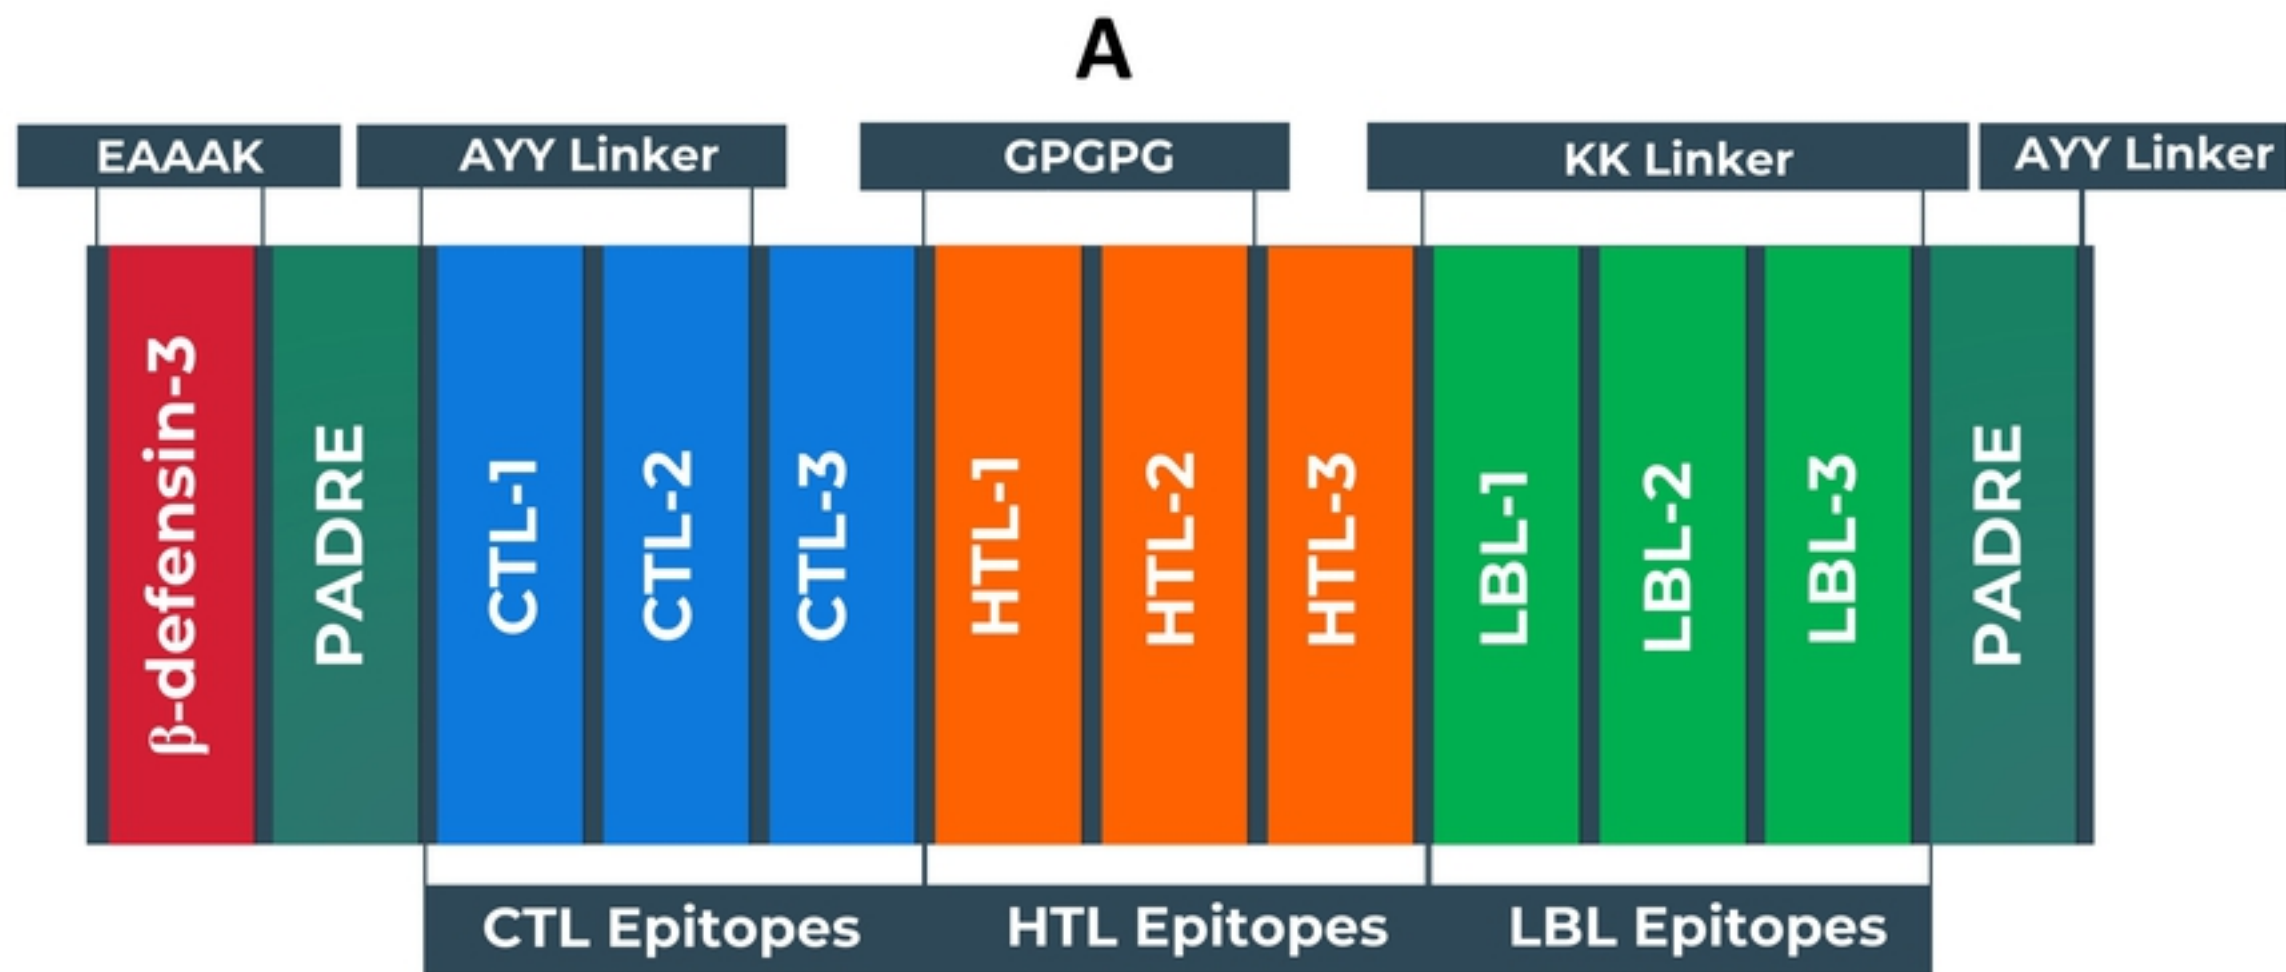

**EAAAKGIINTLQKYYCRVRGGRCVLSCLPKEEQIGKCSTRGRKCCRRKKEAAA**  
**KAKFVAAWTLKAAAAAYVSLNPTSEKAAAYQTNDNITARAAYCIAALVITKAAAY**  
**RSGLTAVIRAAYSVKNIMLGHAAYKTNVTLSSKAAAYKSALLSTNKAAYIASGV**  
**AVSKAAAYKQLLPVINKAAAYITIELSNIKAAAYLTSKVLDLKAAYTTTQTQPSKAAAY**  
**IFIASANHK**GPGP**GLGMLHTLVVASAGPT**GPGP**GLHTLVVASAGPTSARG**GPGP****  
**GEVLTASLTTEIQING**GPGP**GIVIIVILLSLIAVGL**GPGP**GVIIVILLSLIAVGL**GP****  
****GPGP**GEFYQSTCSAVSKGY**GPGP**GLSILAMIISTSLIAG**GPGP**GLSILAMIISTSLII**  
****GPGP**GQNPQLGISPSNPSEI**KK**PEFHGEDANNR**KK**EVTKESPITSNSTIINPTNET**  
**DDTAGNKPNYQR**KK**SFKEDPTPSDNPFS**KK**RNEESEKMAKDTSDEVSLNPTSE**  
****KK**KEVAPEYRHDS**PK**KEYRGTPRNQDLYDA**KK**VFPSDEFDASISQVNE**KK**KT**  
**SQIKNTTPTYLTQNPQLGISPSNPSEITS**KK**IPN**KK**PG**KK**TTTKPT**KK**PTL**KK**TT**KK**D**  
**PKPQTTKSKEVPTTKPTEEPTINTT**KK**SNTTGNPELTSQ**KK**KAKFVAAWTLKAAA**  
**AAAY**

Fig 3

**A**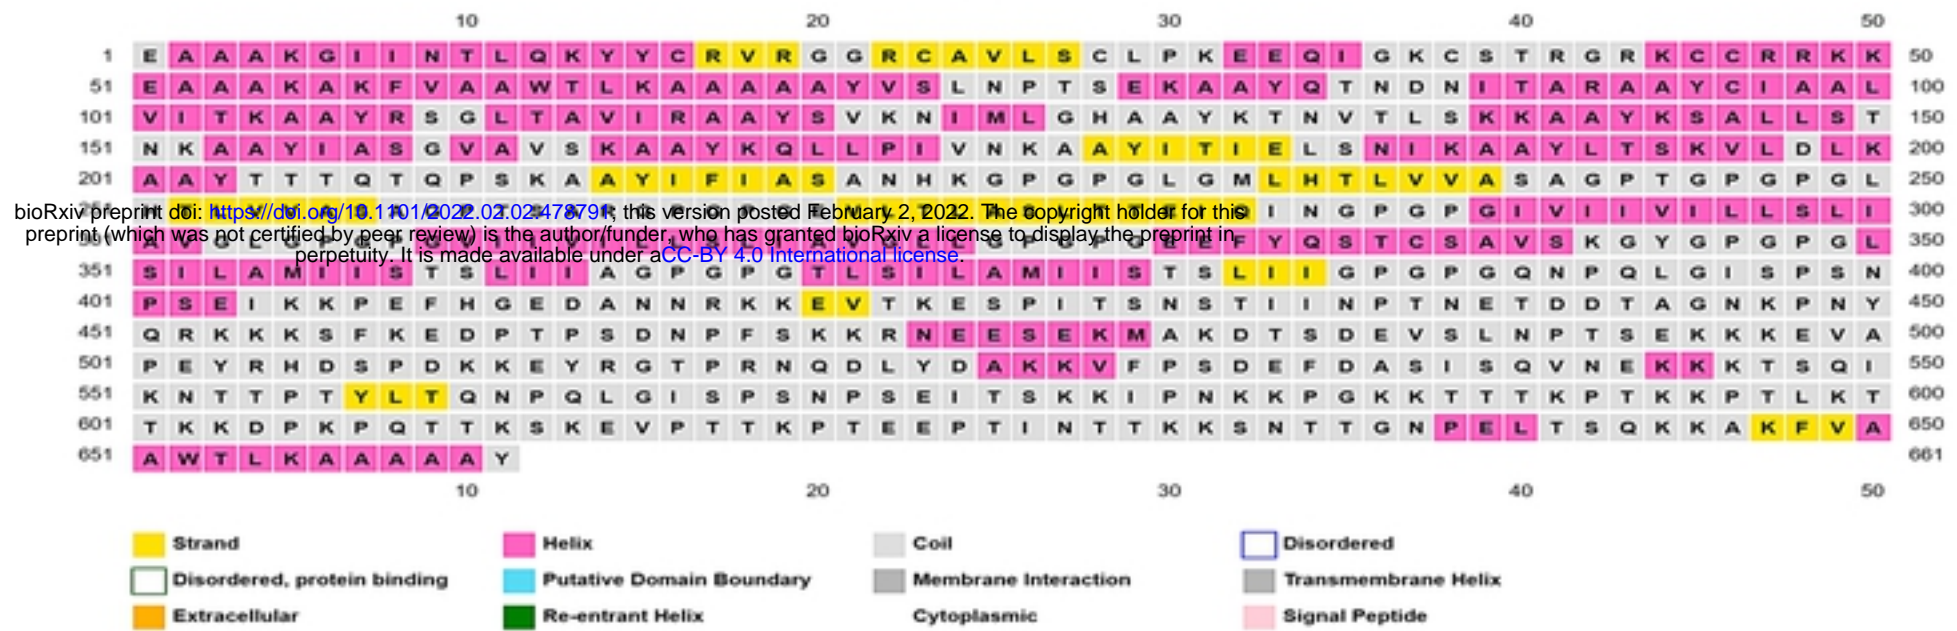**B**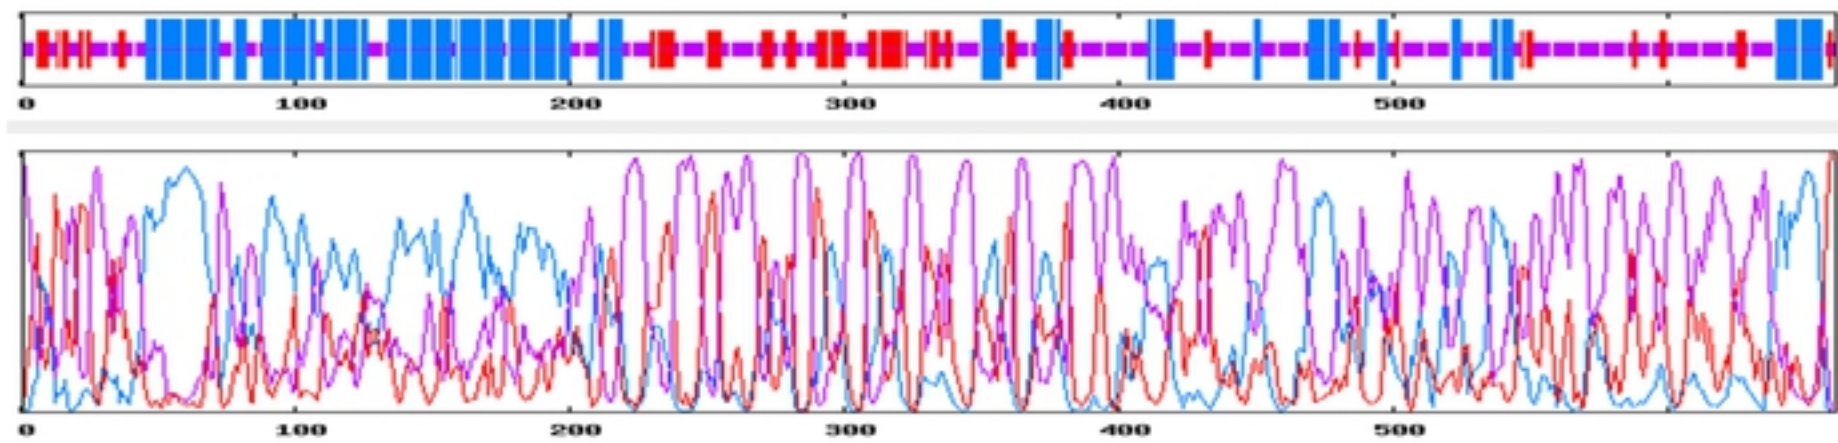**C**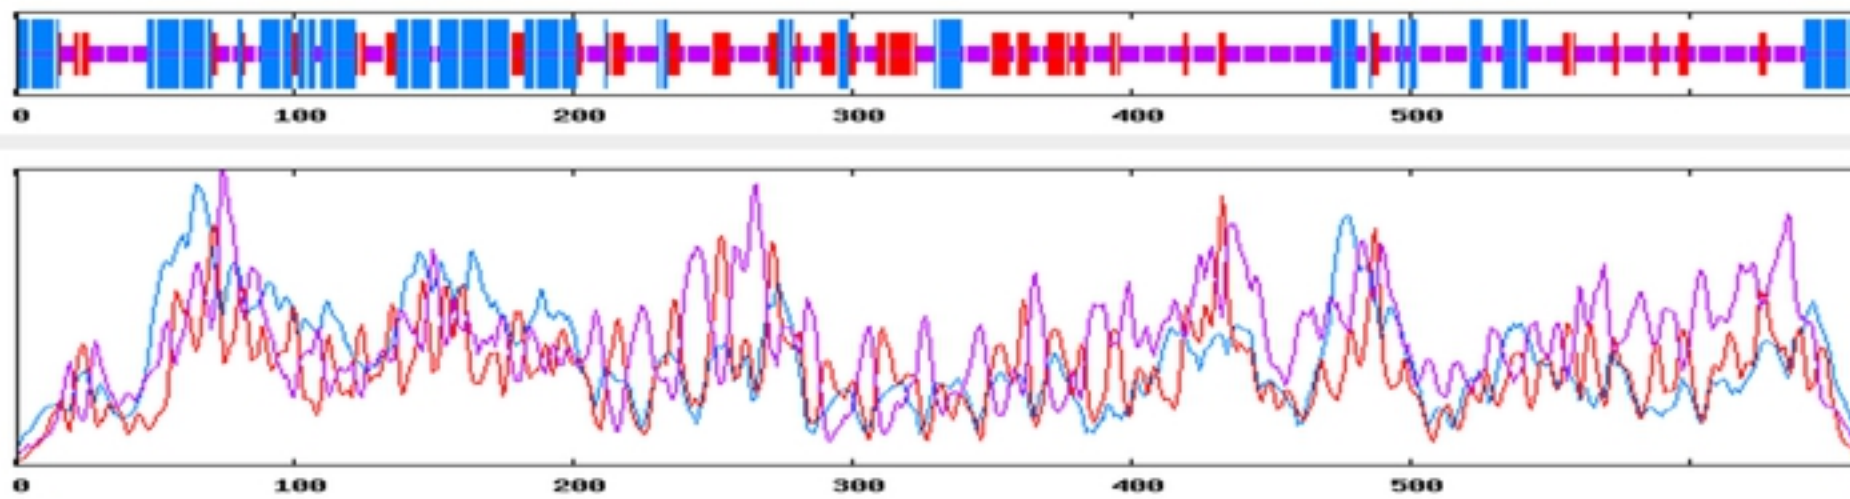**D**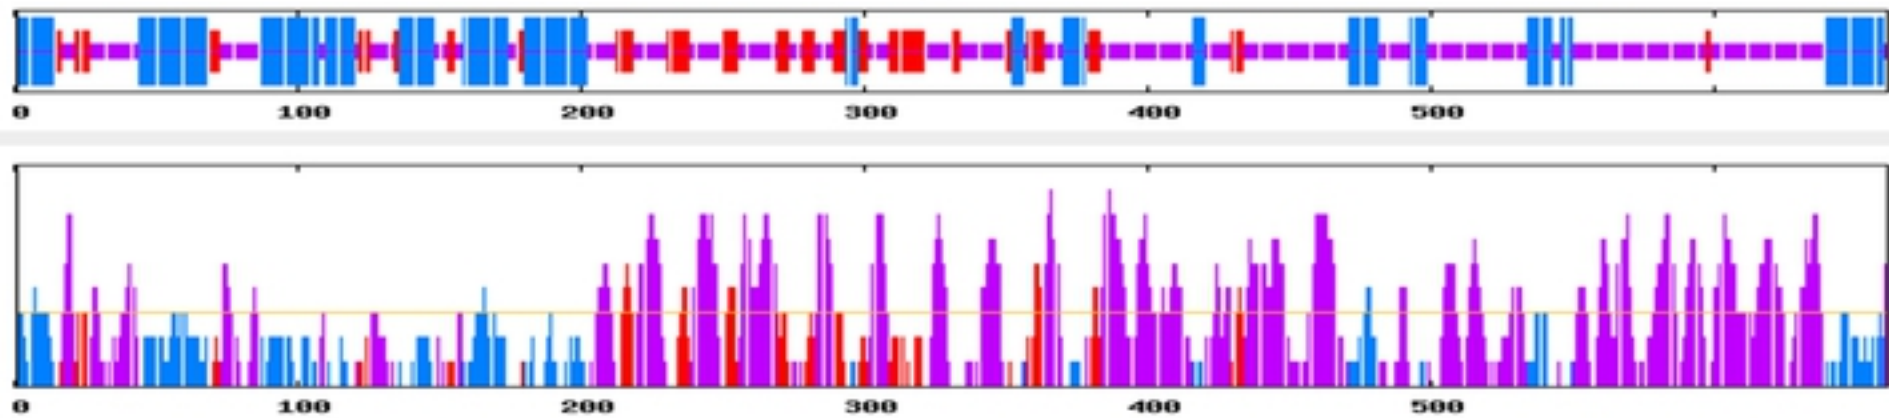

Fig 4

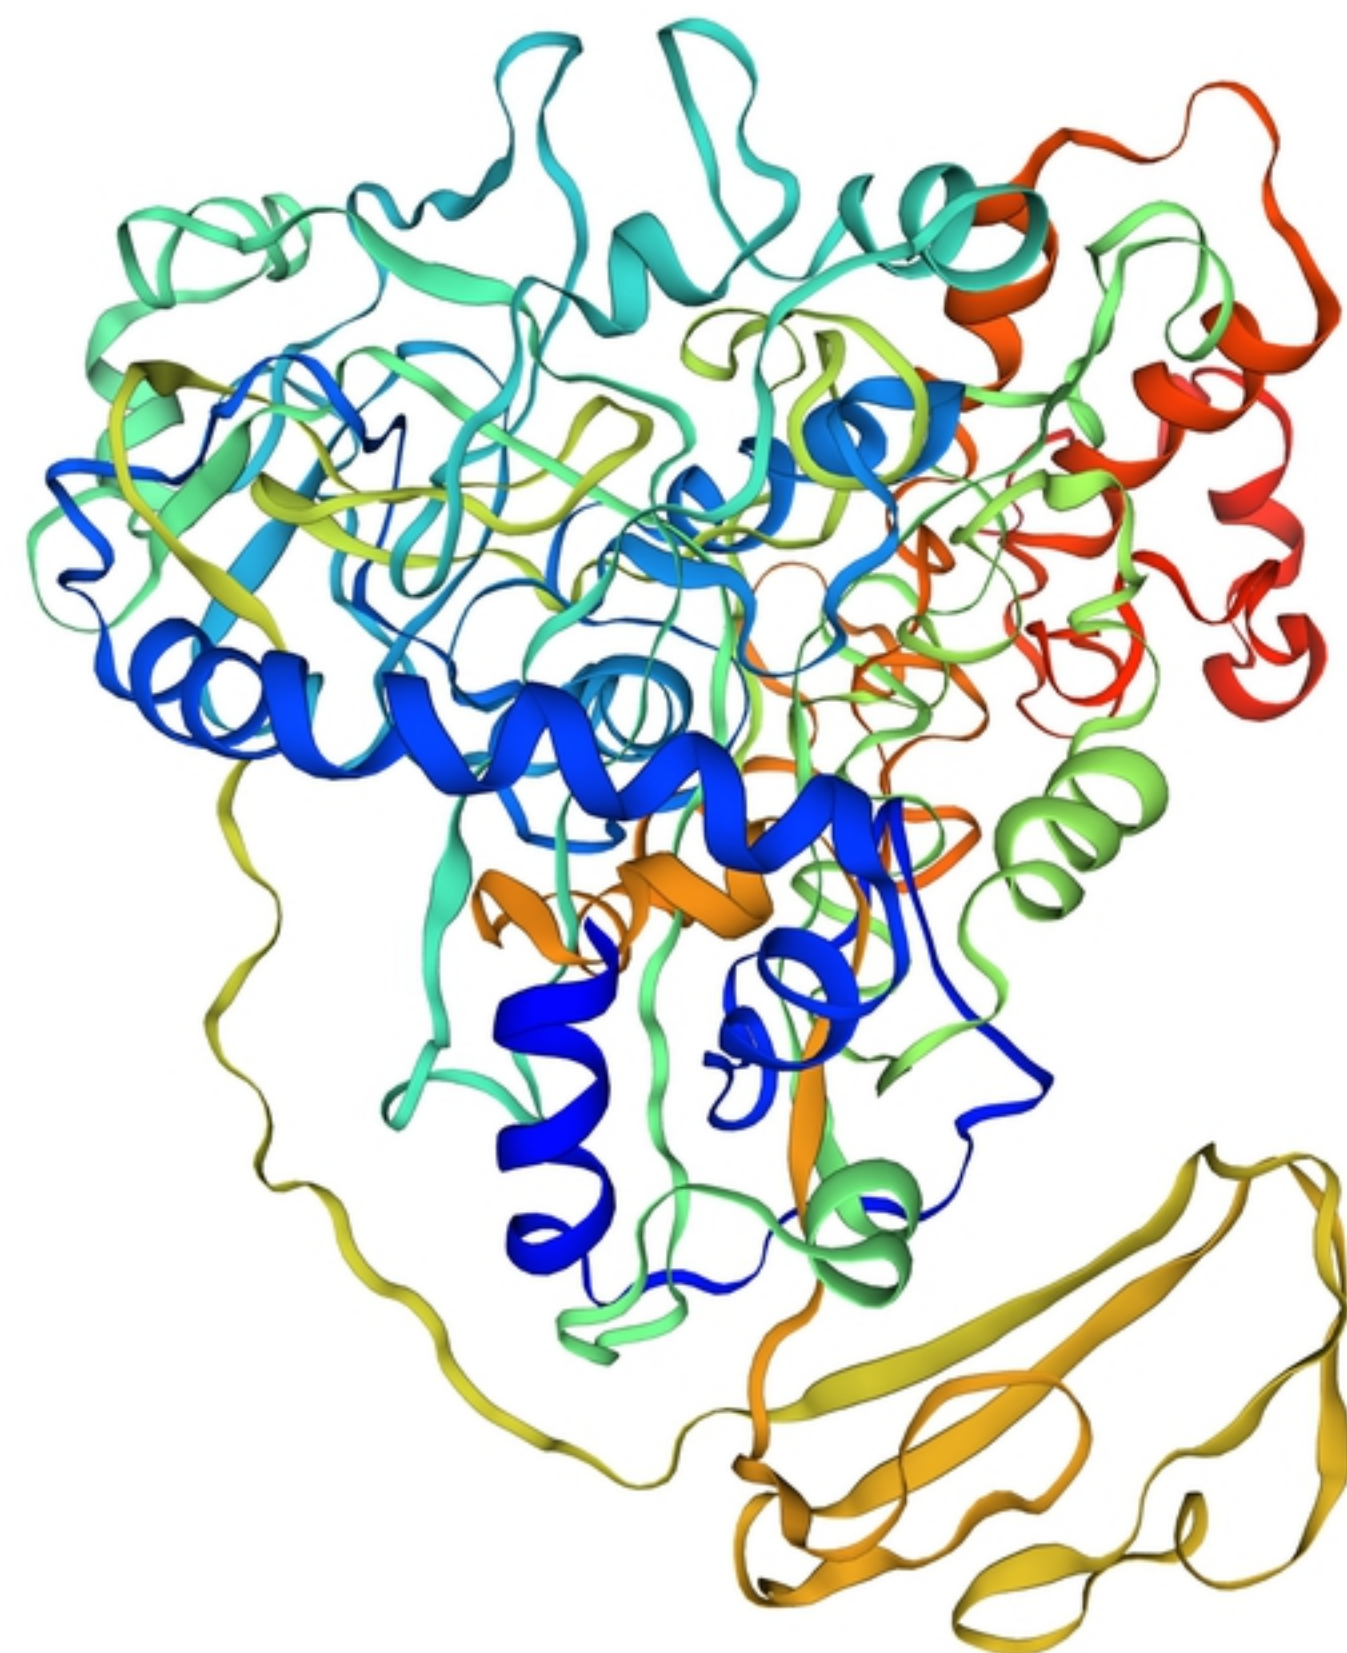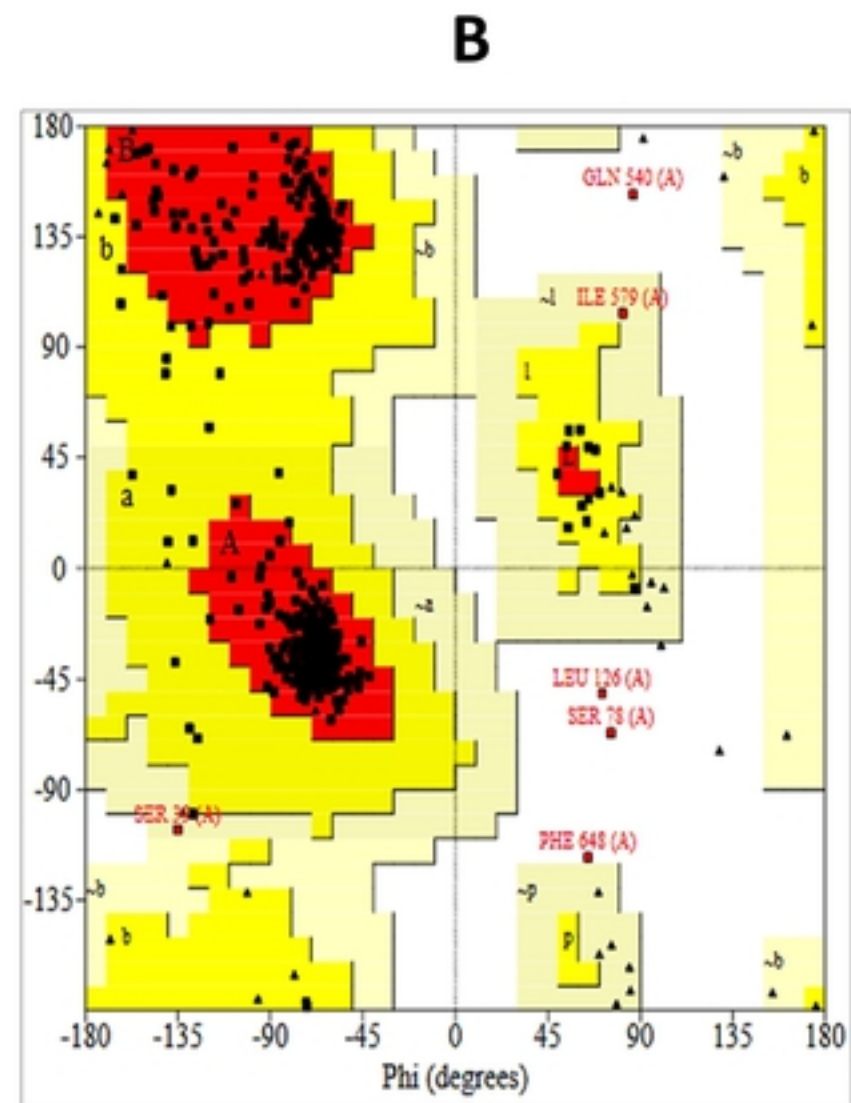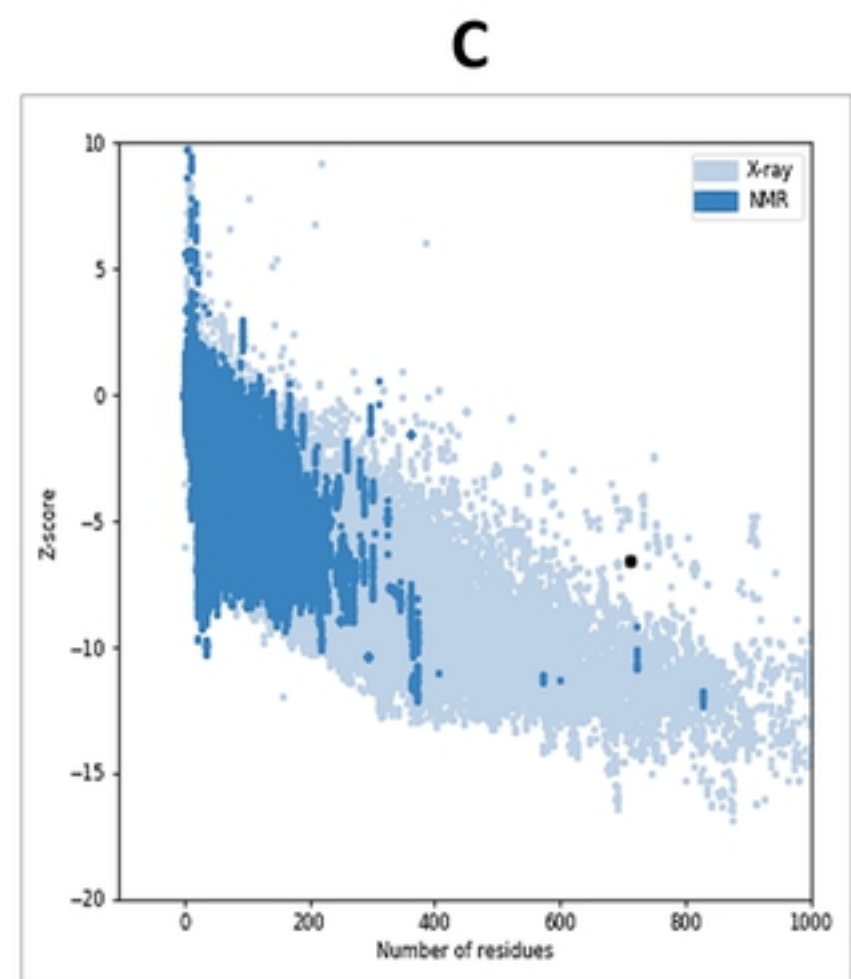

Fig 5



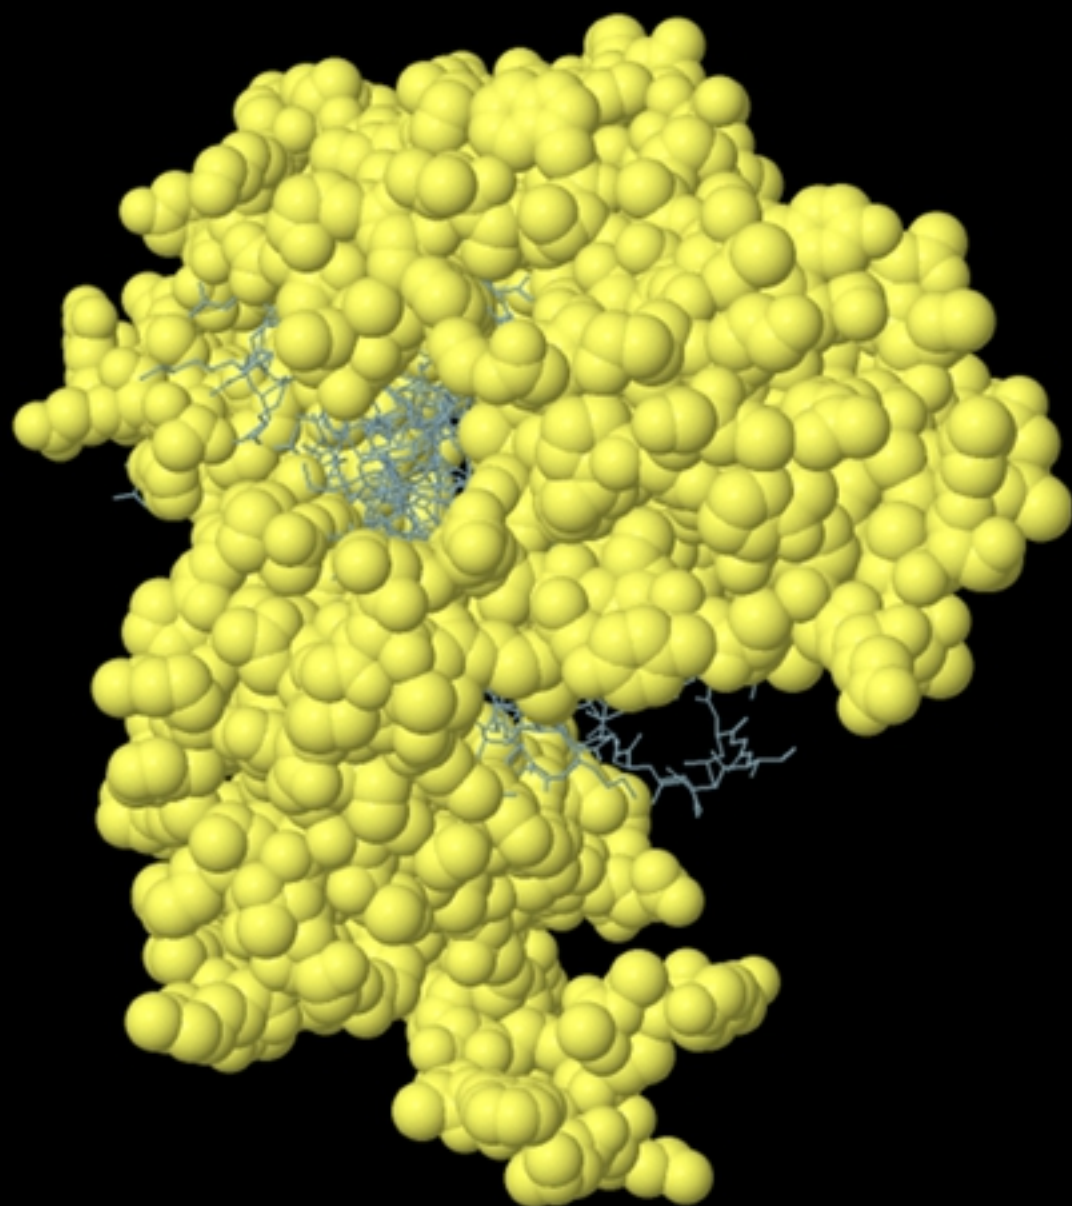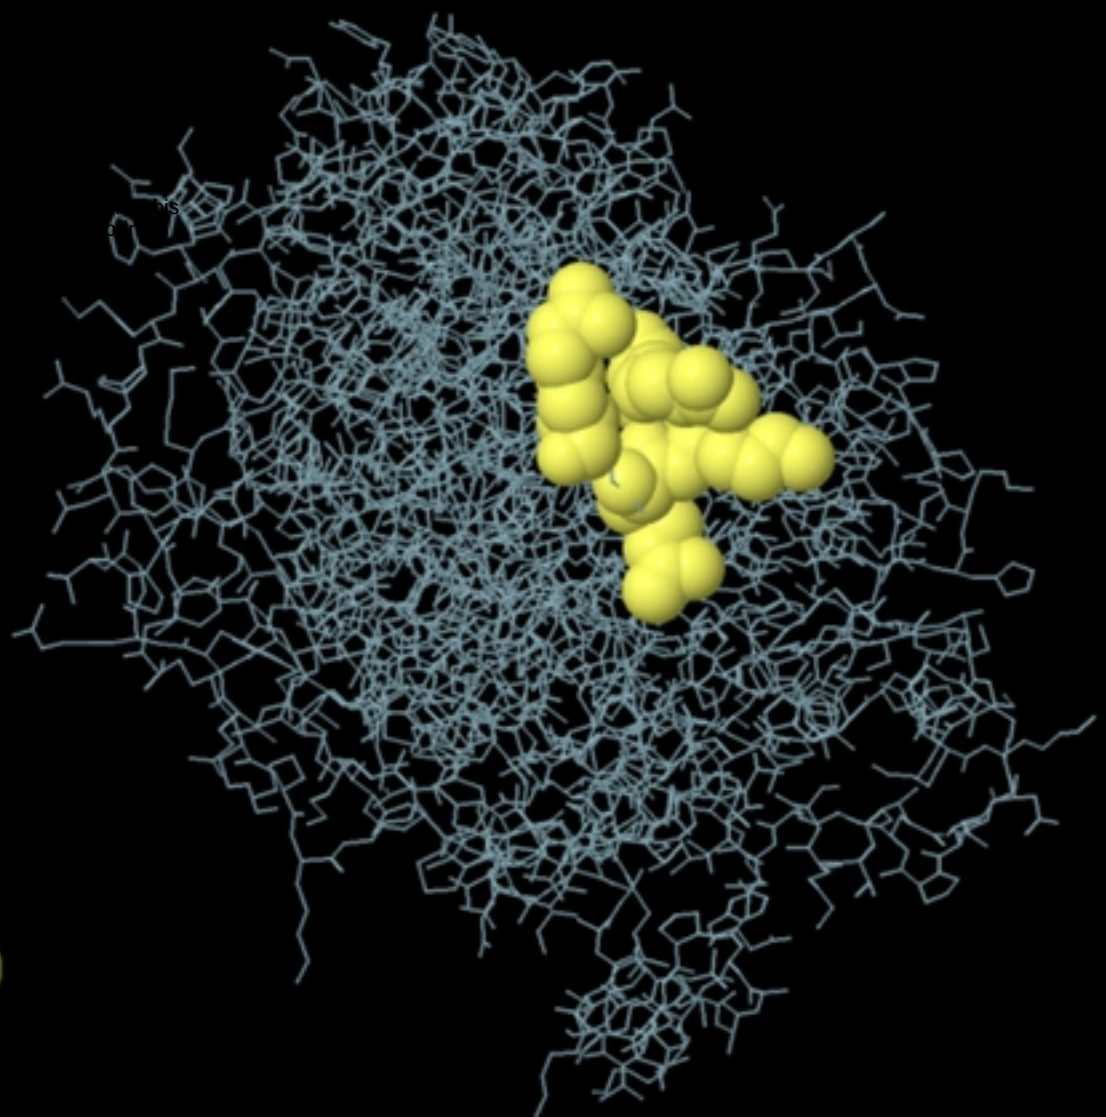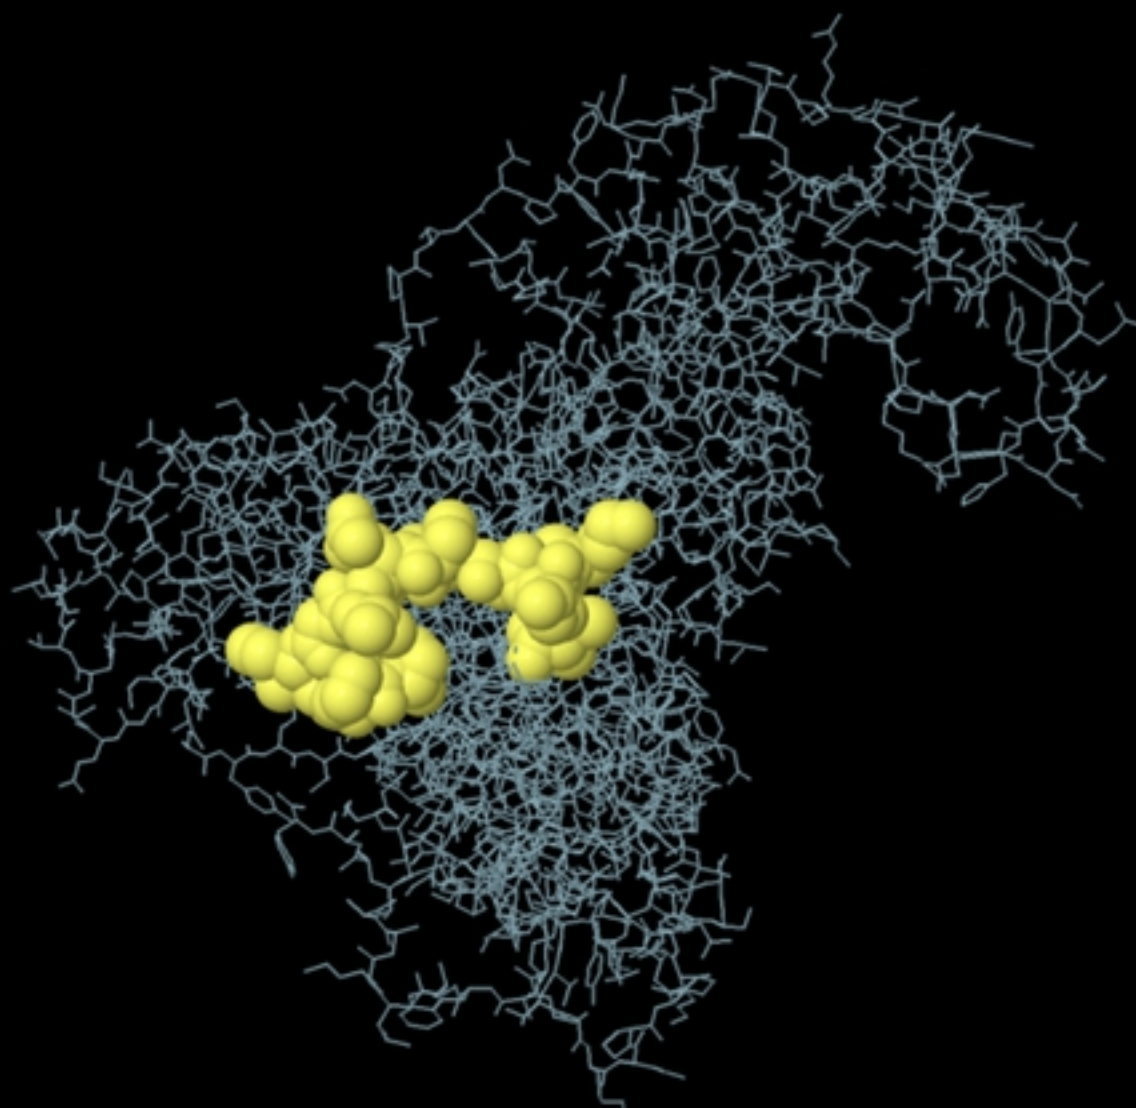

Fig 6

# Snapshot at 0 ns

# Snapshot at 100 ns

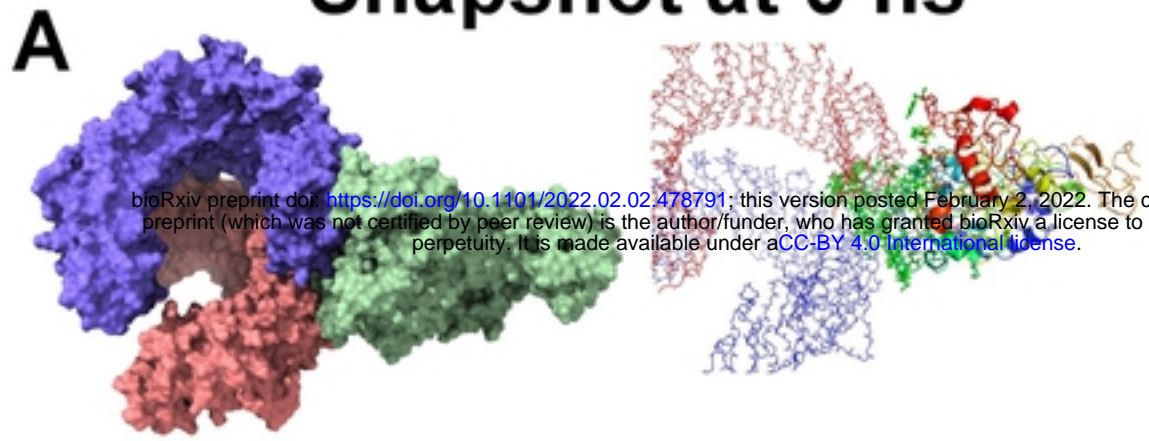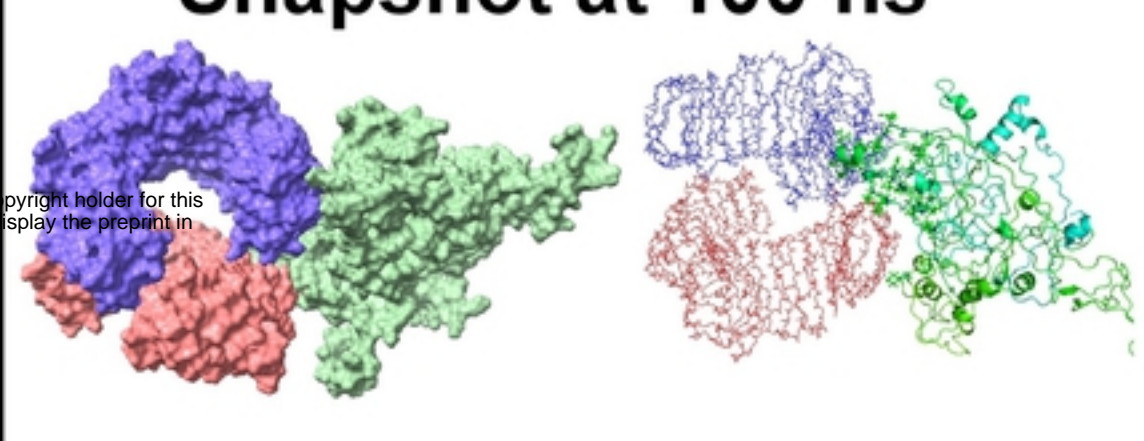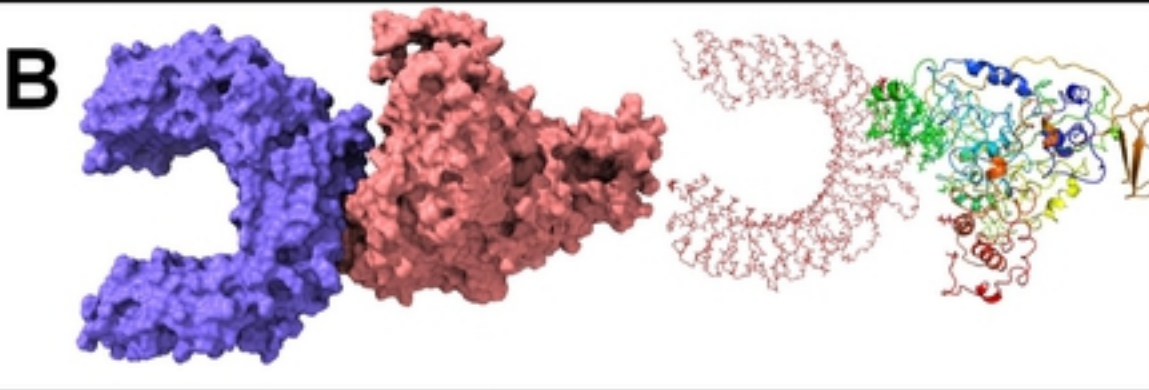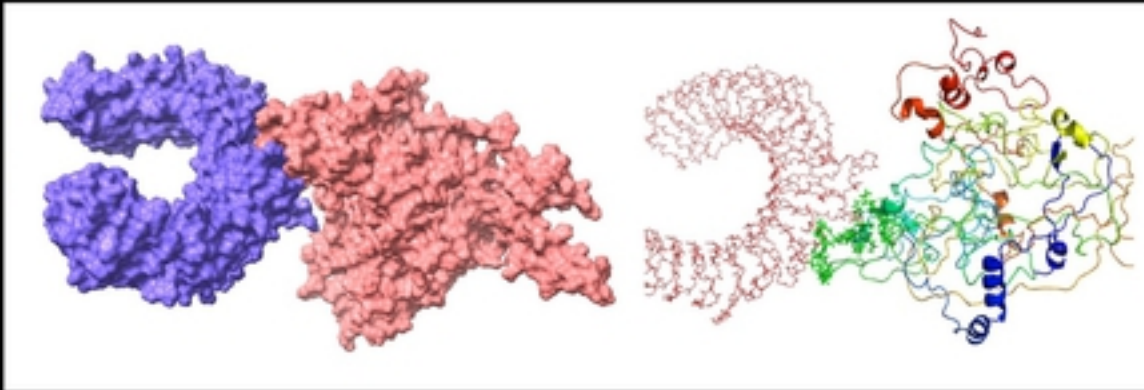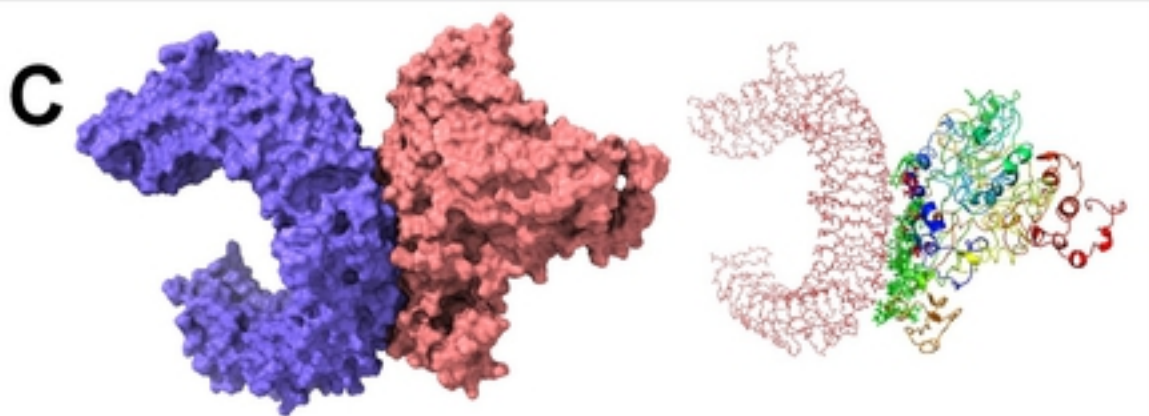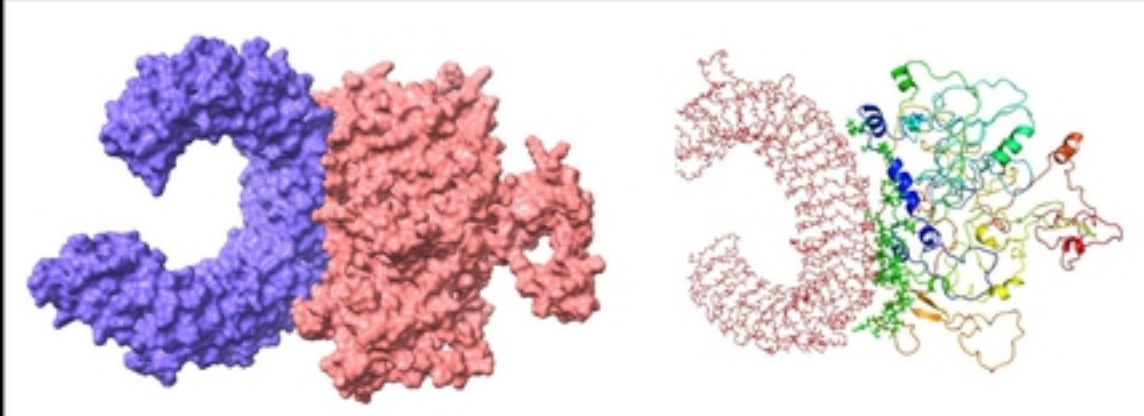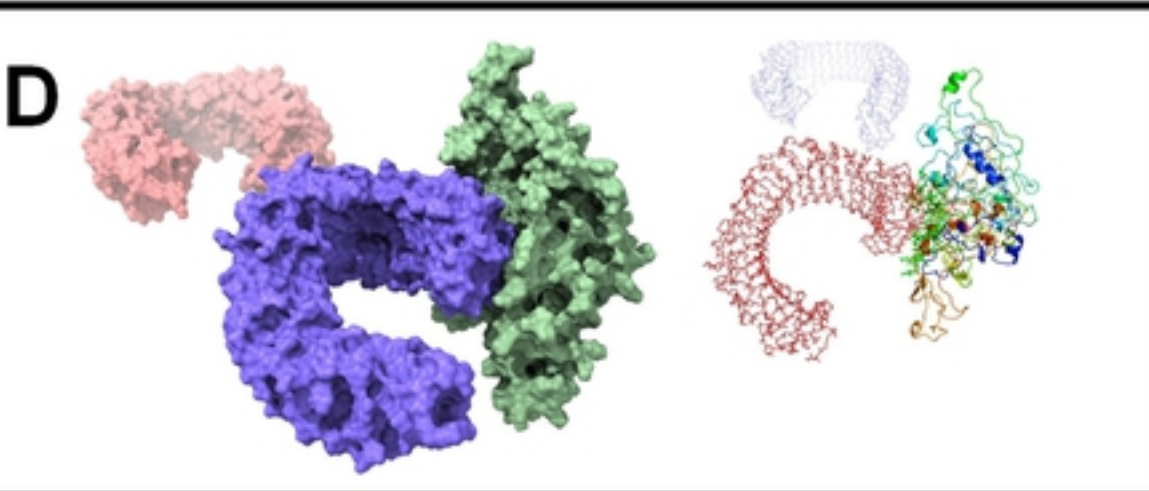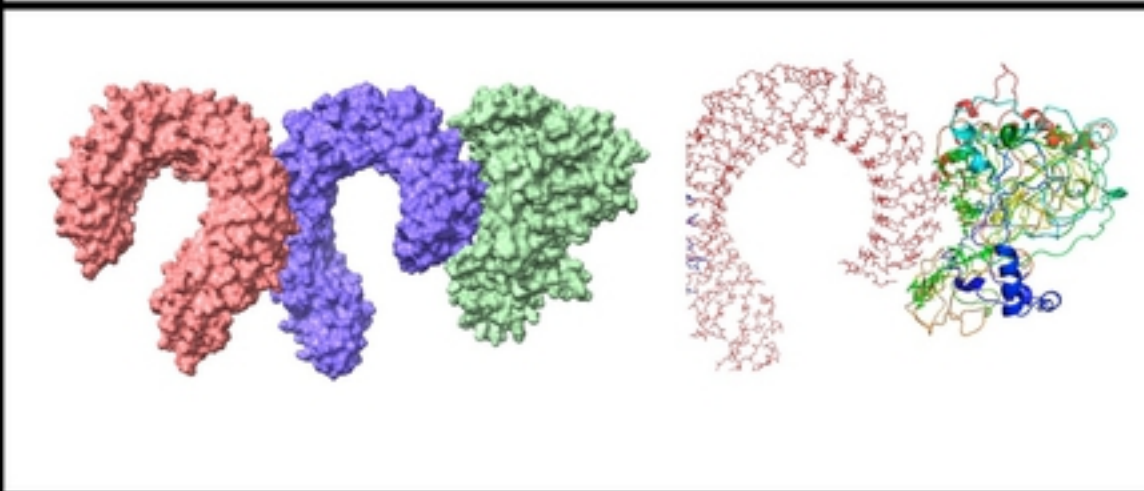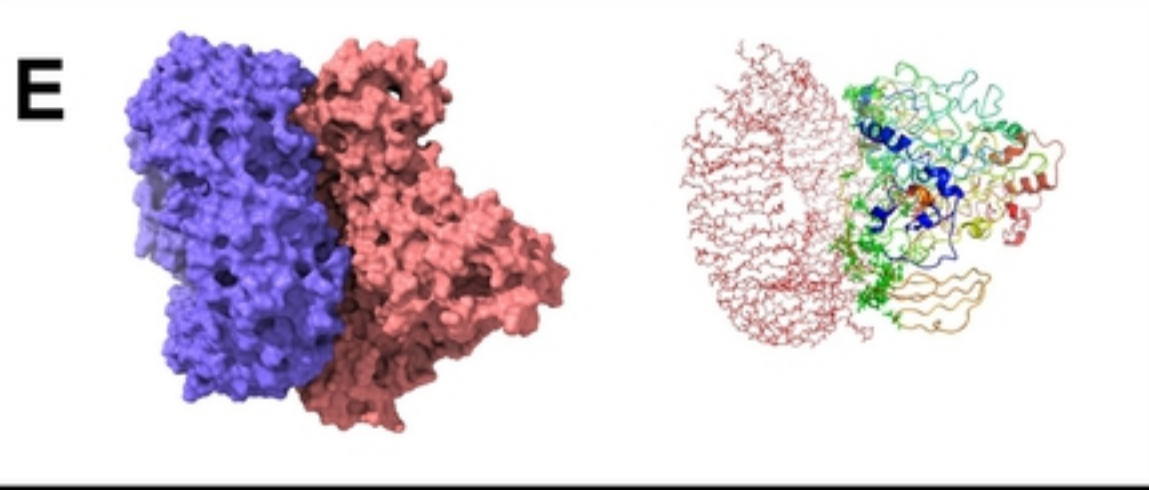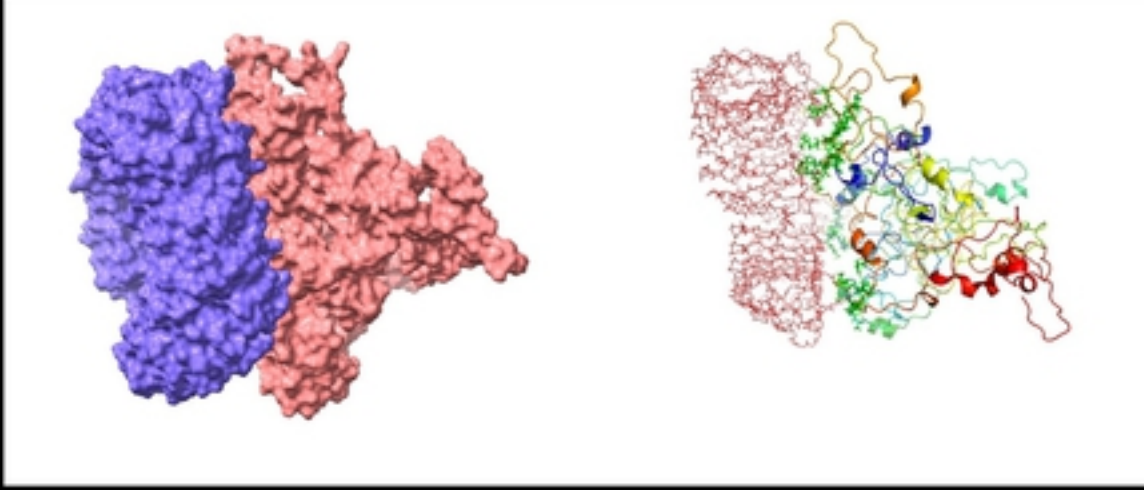

Fig 7

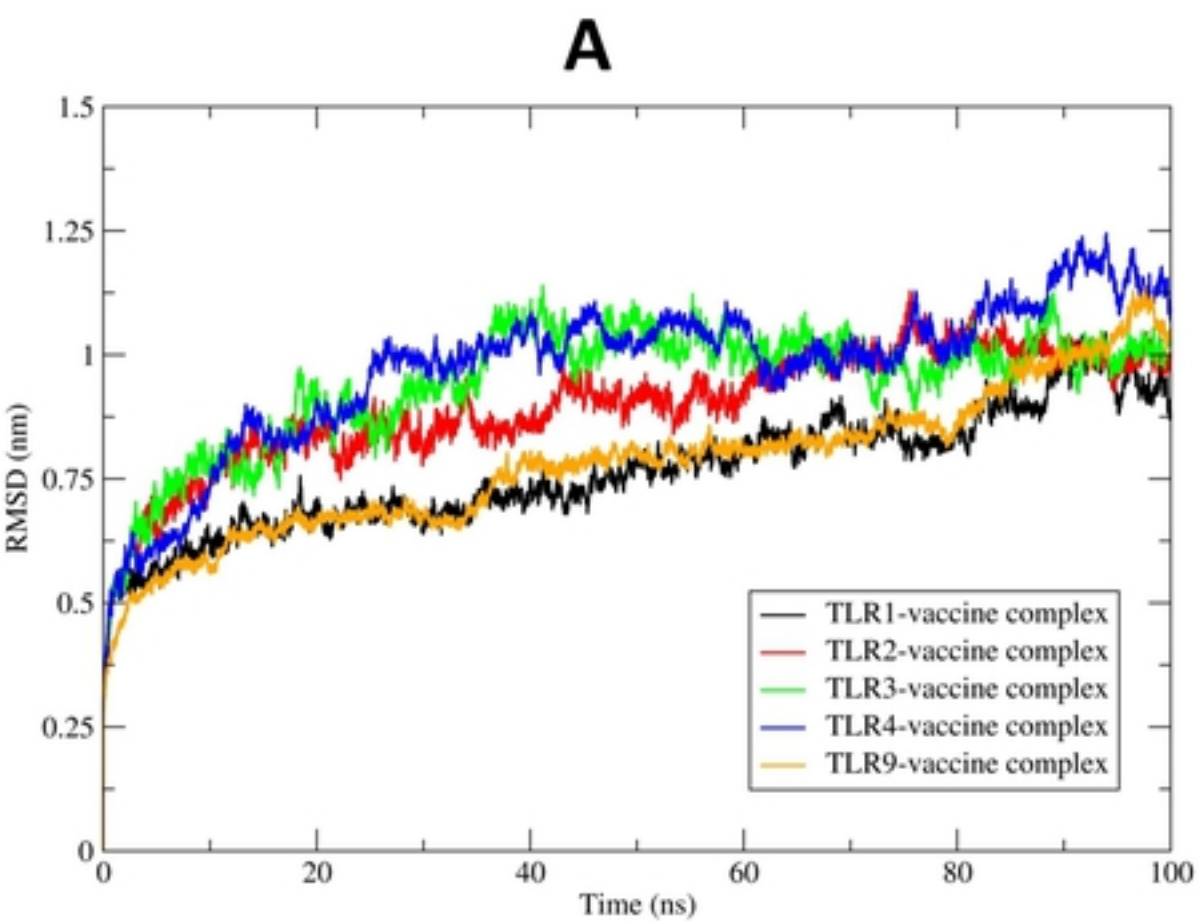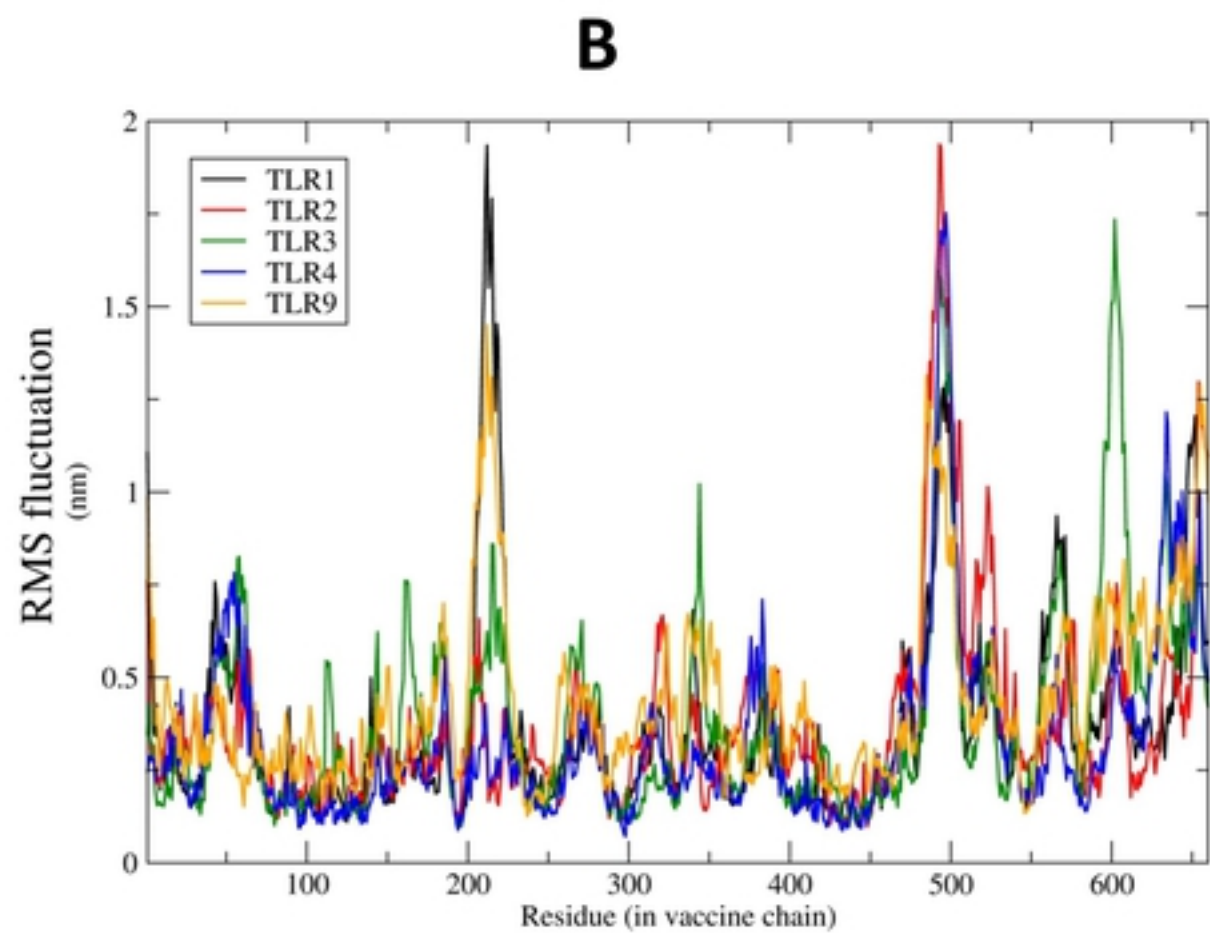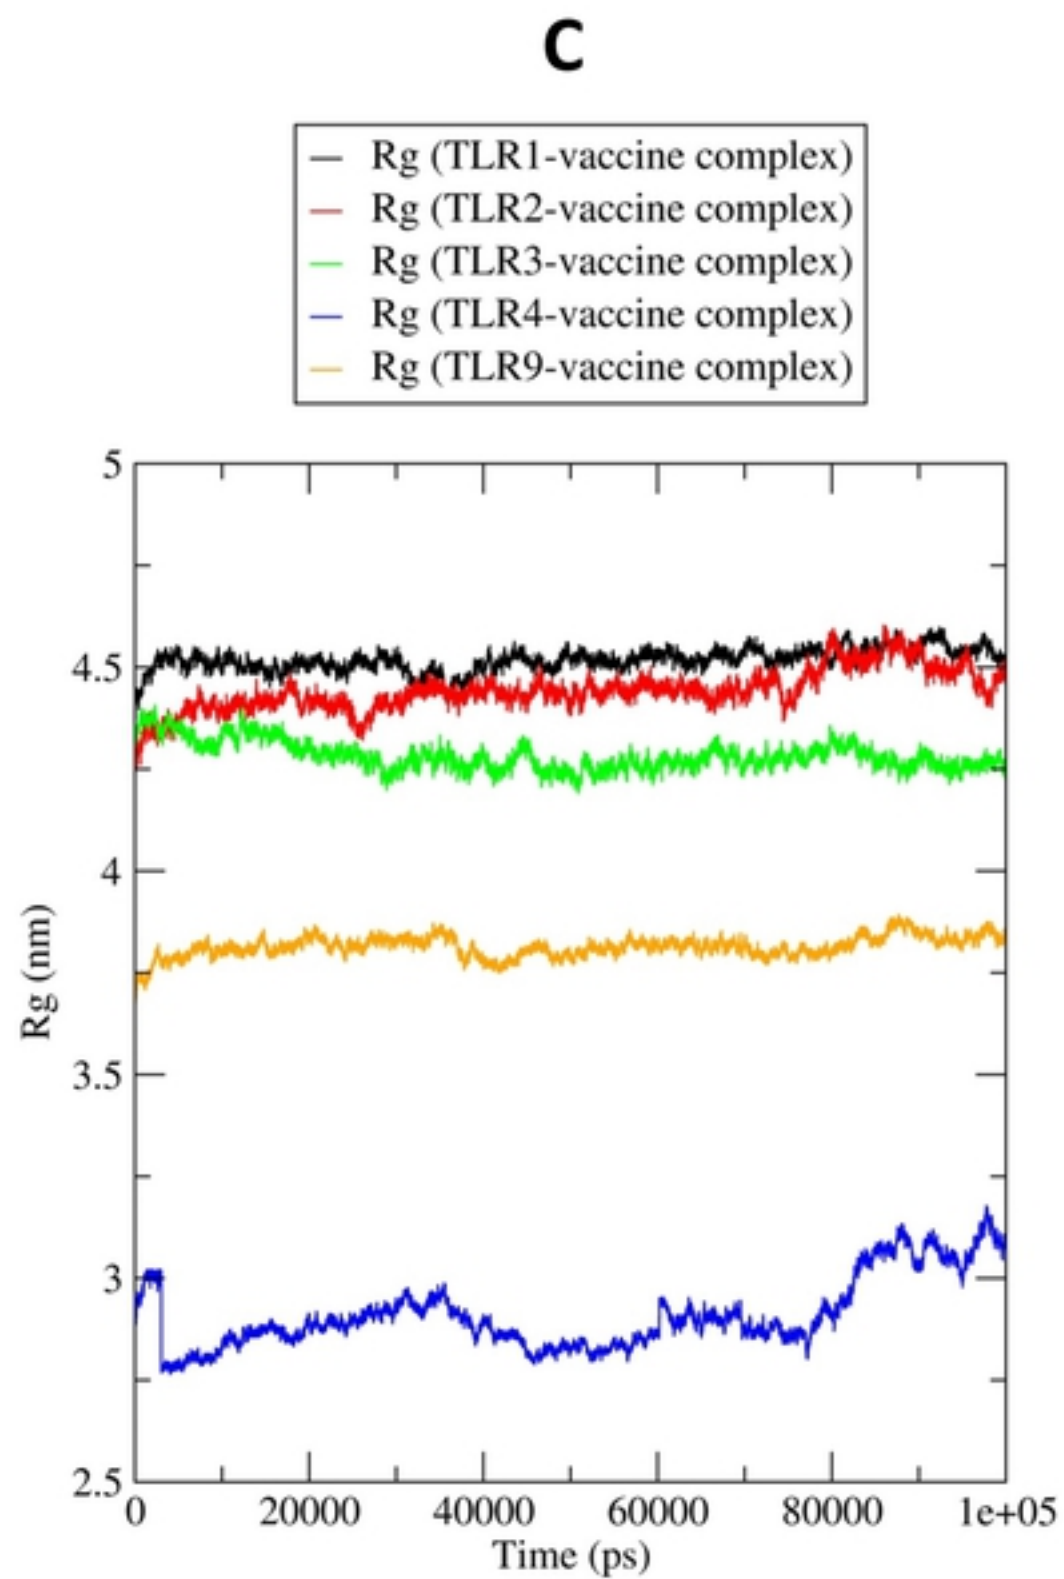

Fig 8

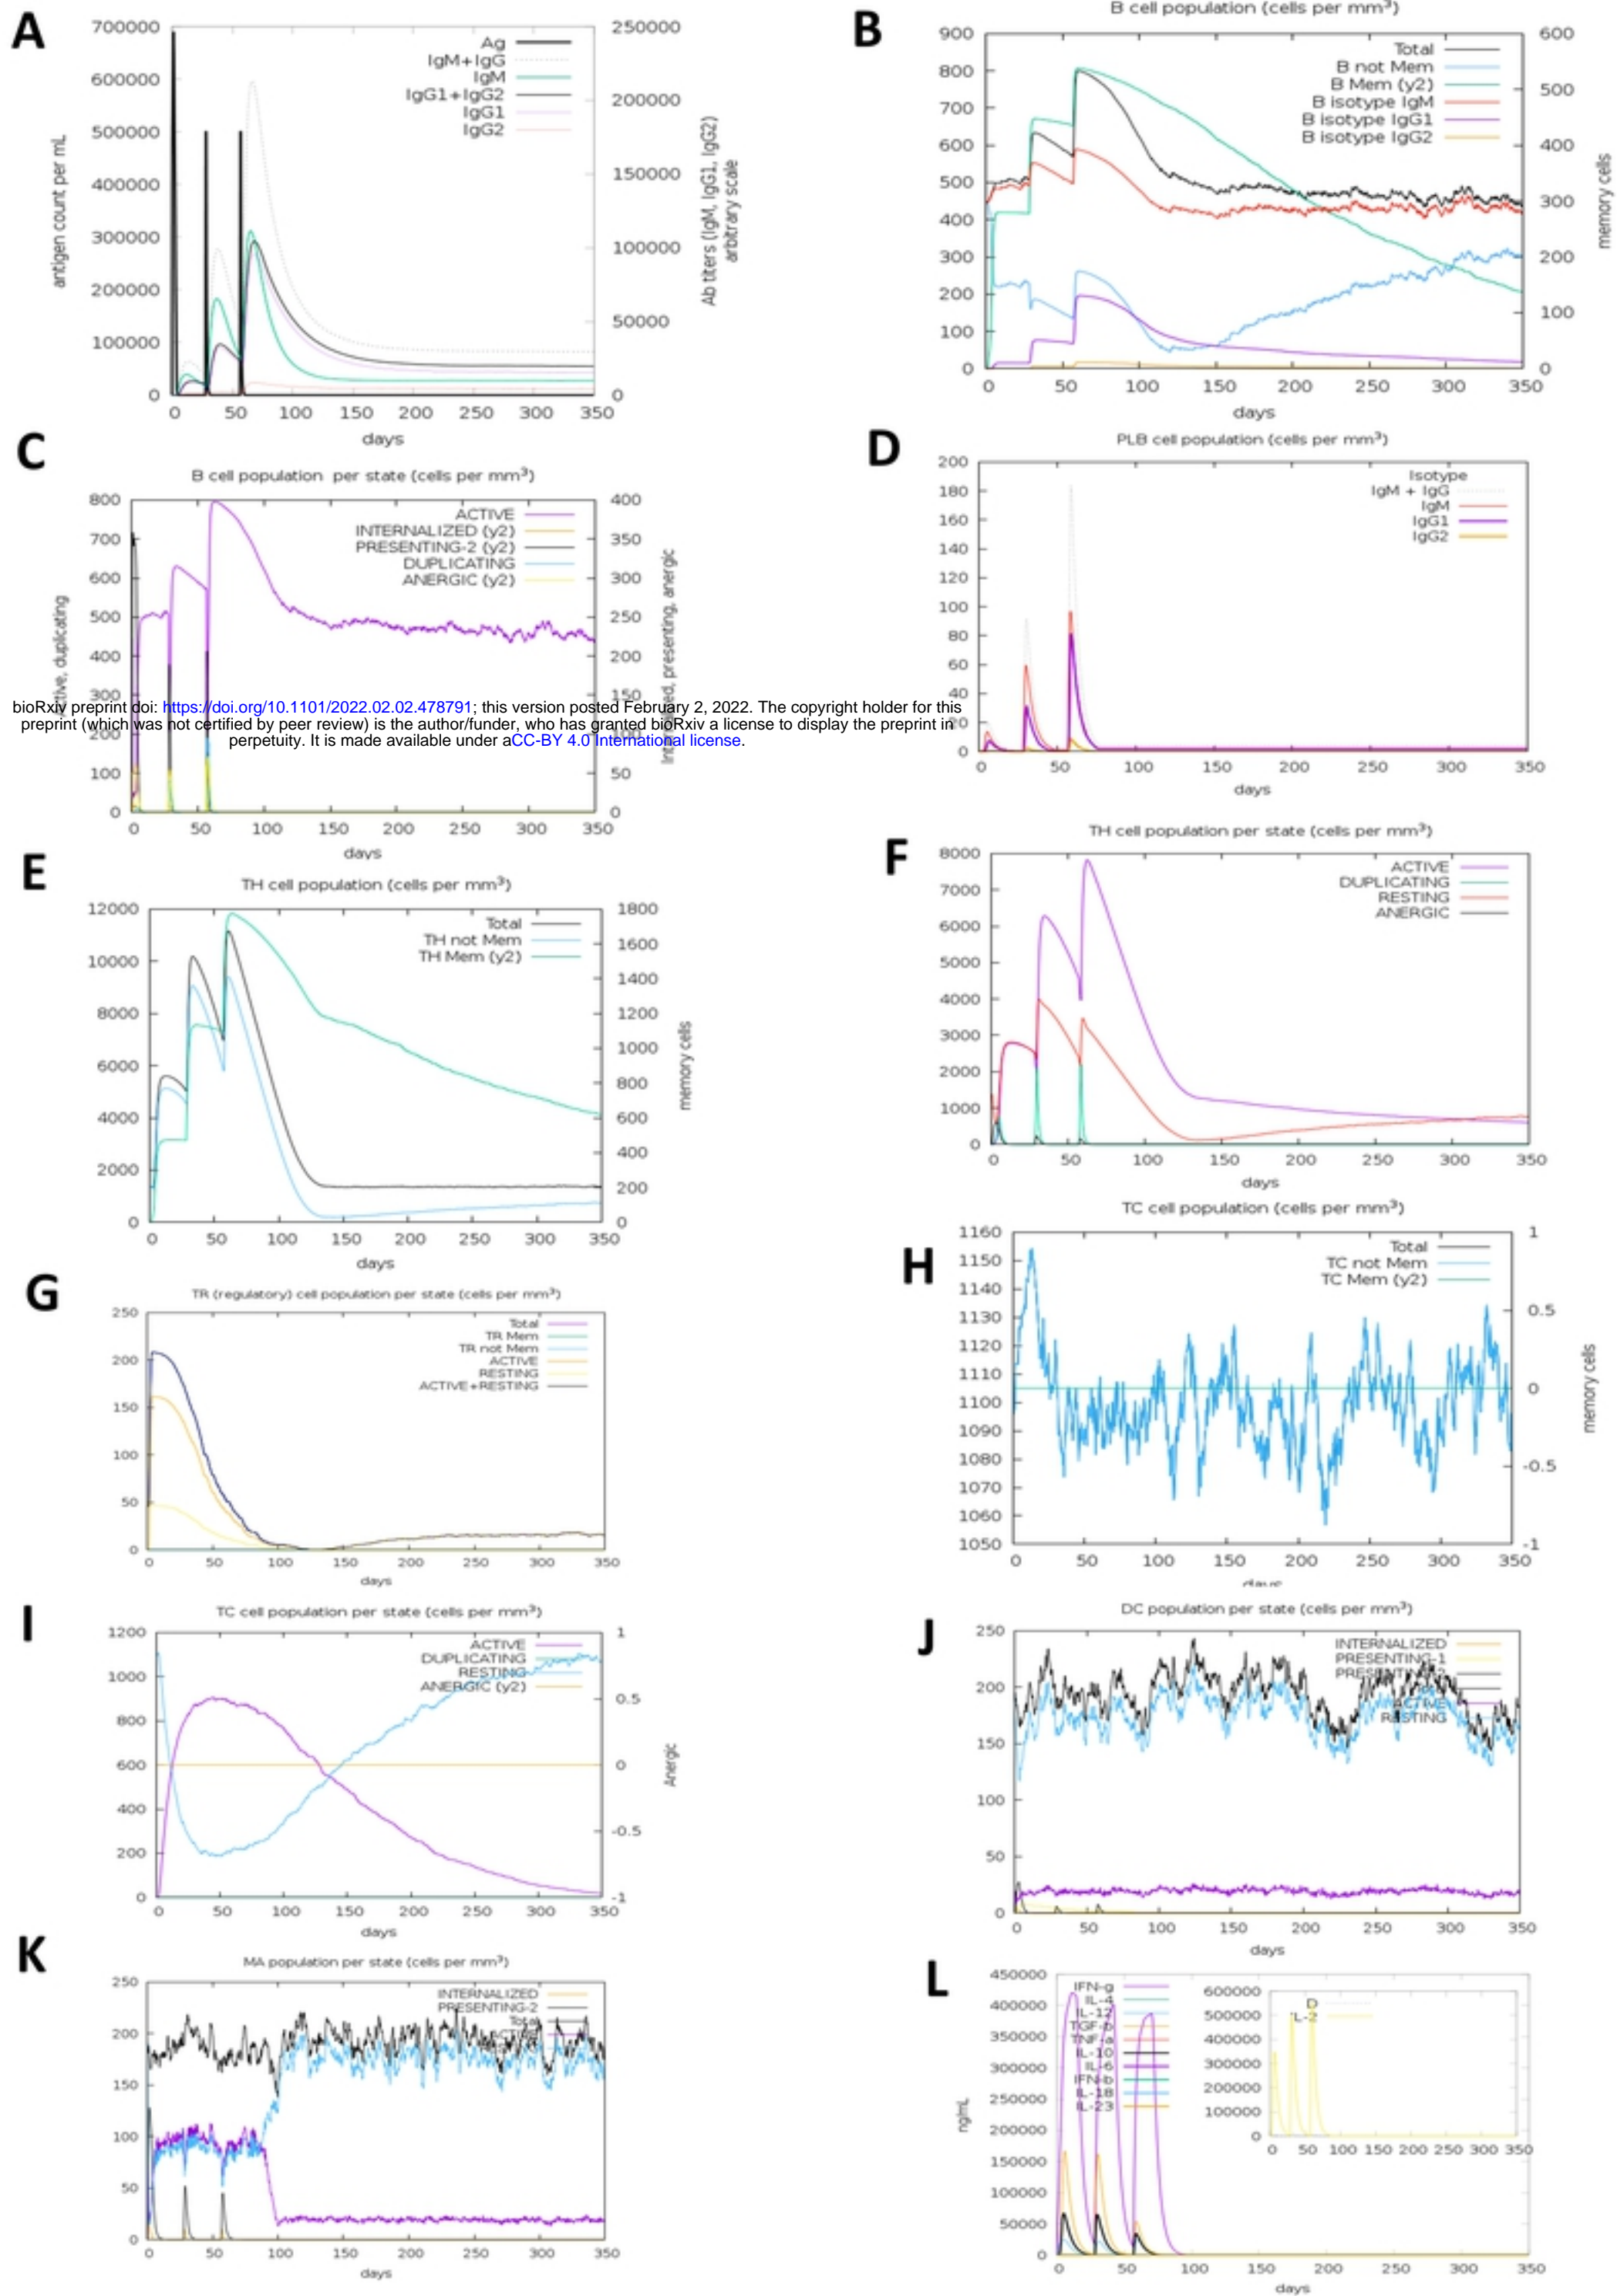

bioRxiv preprint doi: <https://doi.org/10.1101/2022.02.02.478791>; this version posted February 2, 2022. The copyright holder for this preprint (which was not certified by peer review) is the author/funder, who has granted bioRxiv a license to display the preprint in perpetuity. It is made available under aCC-BY 4.0 International license.

Fig 9
